# Supplementary material for: Coupling of palaeontological and neontological reef coral data improves forecasts of biodiversity responses under global climatic change
Source: R Soc Open Sci. 2019 Apr 24;6(4):182111. doi: 10.1098/rsos.182111 (PMC6502368; doi:10.1098/rsos.182111)
Supplement: Supplementary Material 1 [file rsos182111supp1.xlsx]

## Sheet: Modern occurrences
Supplementary Material 1: Occurrence data for modern and LIG reef corals, as well as the training data for ecological niche modelling. Training data is subsampled to 1.25° x 1.25° and clipped to cells with available environmental data.
Species	Longitude	Latitude	Reference
Acanthastrea brevis	39.73	-4.02	Milne Edwards & Haime, 1849
Acanthastrea brevis	40.5397	-12.9407	Milne Edwards & Haime, 1849
Acanthastrea brevis	71.5	-6.2	Milne Edwards & Haime, 1849
Acanthastrea brevis	40.92	-2.36	Milne Edwards & Haime, 1849
Acanthastrea brevis	40.6851	-11.015	Milne Edwards & Haime, 1849
Acanthastrea brevis	59.63	-16.61	Milne Edwards & Haime, 1849
Acanthastrea brevis	43.33	11.5	Milne Edwards & Haime, 1849
Acanthastrea brevis	49.07	-12.13	Milne Edwards & Haime, 1849
Acanthastrea brevis	49.72	-12.76	Milne Edwards & Haime, 1849
Acanthastrea brevis	40.7055	-14.3762	Milne Edwards & Haime, 1849
Acanthastrea brevis	49.0675	-12.1075	Milne Edwards & Haime, 1849
Acanthastrea brevis	47.9533	-13.5069	Milne Edwards & Haime, 1849
Acanthastrea brevis	48.5525	-13.0383	Milne Edwards & Haime, 1849
Acanthastrea brevis	48.5953	-12.8269	Milne Edwards & Haime, 1849
Acanthastrea brevis	48.5775	-12.855	Milne Edwards & Haime, 1849
Acanthastrea brevis	48.9714	-12.2706	Milne Edwards & Haime, 1849
Acanthastrea brevis	48.1017	-13.5694	Milne Edwards & Haime, 1849
Acanthastrea brevis	48.1617	-13.3228	Milne Edwards & Haime, 1849
Acanthastrea brevis	48.1847	-13.3092	Milne Edwards & Haime, 1849
Acanthastrea brevis	49.0675	-12.1075	Milne Edwards & Haime, 1849
Acanthastrea brevis	47.9533	-13.5069	Milne Edwards & Haime, 1849
Acanthastrea brevis	48.5525	-13.0383	Milne Edwards & Haime, 1849
Acanthastrea brevis	48.5953	-12.8269	Milne Edwards & Haime, 1849
Acanthastrea brevis	48.5775	-12.855	Milne Edwards & Haime, 1849
Acanthastrea brevis	48.9714	-12.2706	Milne Edwards & Haime, 1849
Acanthastrea brevis	48.1017	-13.5694	Milne Edwards & Haime, 1849
Acanthastrea brevis	48.1617	-13.3228	Milne Edwards & Haime, 1849
Acanthastrea brevis	48.1847	-13.3092	Milne Edwards & Haime, 1849
Acanthastrea echinata	93.7361	7.23778	(Dana, 1846)
Acanthastrea echinata	146.48	-18.567	(Dana, 1846)
Acanthastrea echinata	144.048	-9.926	(Dana, 1846)
Acanthastrea echinata	144.023	-9.939	(Dana, 1846)
Acanthastrea echinata	146.483	-18.6	(Dana, 1846)
Acanthastrea echinata	144.817	-14.4255	(Dana, 1846)
Acanthastrea echinata	142.2	-10.483	(Dana, 1846)
Acanthastrea echinata	146.503	-18.657	(Dana, 1846)
Acanthastrea echinata	146.511	-18.659	(Dana, 1846)
Acanthastrea echinata	146.69	-18.73	(Dana, 1846)
Acanthastrea echinata	146.533	-18.766	(Dana, 1846)
Acanthastrea echinata	146.59	-18.68	(Dana, 1846)
Acanthastrea echinata	31.07	-29.82
Acanthastrea echinata	119.17	-4.8	(Dana, 1846)
Acanthastrea echinata	120.5	-6.3	(Dana, 1846)
Acanthastrea echinata	145.772	-16.118	(Dana, 1846)
Acanthastrea echinata	145.672	-16.214	(Dana, 1846)
Acanthastrea echinata	145.637	-16.1143	(Dana, 1846)
Acanthastrea echinata	145.643	-16.1188	(Dana, 1846)
Acanthastrea echinata	145.665	-16.267	(Dana, 1846)
Acanthastrea echinata	145.841	-16.0863	(Dana, 1846)
Acanthastrea echinata	148.628	-20.0212	(Dana, 1846)
Acanthastrea echinata	148.624	-20.0153	(Dana, 1846)
Acanthastrea echinata	145.462	-15.7433	(Dana, 1846)
Acanthastrea echinata	148.658	-20.1085	(Dana, 1846)
Acanthastrea echinata	148.653	-20.1107	(Dana, 1846)
Acanthastrea echinata	145.506	-16.3048	(Dana, 1846)
Acanthastrea echinata	148.609	-20.102	(Dana, 1846)
Acanthastrea echinata	148.906	-20.1455	(Dana, 1846)
Acanthastrea echinata	146.388	-17.7095	(Dana, 1846)
Acanthastrea echinata	149.074	-20.1613	(Dana, 1846)
Acanthastrea echinata	149.106	-20.266	(Dana, 1846)
Acanthastrea echinata	149.035	-20.157	(Dana, 1846)
Acanthastrea echinata	149.01	-20.1723	(Dana, 1846)
Acanthastrea echinata	149.055	-20.2927	(Dana, 1846)
Acanthastrea echinata	149.04	-20.2357	(Dana, 1846)
Acanthastrea echinata	145.66	-16.2623	(Dana, 1846)
Acanthastrea echinata	145.554	-15.7845	(Dana, 1846)
Acanthastrea echinata	146.196	-17.0607	(Dana, 1846)
Acanthastrea echinata	145.417	-15.1333	(Dana, 1846)
Acanthastrea echinata	145.997	-16.7663	(Dana, 1846)
Acanthastrea echinata	145.948	-16.6373	(Dana, 1846)
Acanthastrea echinata	145.963	-16.7503	(Dana, 1846)
Acanthastrea echinata	146.292	-18.1492	(Dana, 1846)
Acanthastrea echinata	145.431	-15.6382	(Dana, 1846)
Acanthastrea echinata	146.046	-16.5513	(Dana, 1846)
Acanthastrea echinata	145.766	-16.1138	(Dana, 1846)
Acanthastrea echinata	145.66	-16.2878	(Dana, 1846)
Acanthastrea echinata	148.887	-20.1657	(Dana, 1846)
Acanthastrea echinata	148.975	-20.1755	(Dana, 1846)
Acanthastrea echinata	149.032	-20.3065	(Dana, 1846)
Acanthastrea echinata	149.019	-20.2402	(Dana, 1846)
Acanthastrea echinata	146.385	-17.7137	(Dana, 1846)
Acanthastrea echinata	145.393	-14.7053	(Dana, 1846)
Acanthastrea echinata	145.843	-16.0732	(Dana, 1846)
Acanthastrea echinata	146.201	-17.092	(Dana, 1846)
Acanthastrea echinata	145.997	-16.7572	(Dana, 1846)
Acanthastrea echinata	146.432	-18.8115	(Dana, 1846)
Acanthastrea echinata	150.975	-23.2074	(Dana, 1846)
Acanthastrea echinata	145.496	-16.2997	(Dana, 1846)
Acanthastrea echinata	148.886	-20.3754	(Dana, 1846)
Acanthastrea echinata	148.481	-20.0657	(Dana, 1846)
Acanthastrea echinata	148.497	-20.0802	(Dana, 1846)
Acanthastrea echinata	146.077	-17.2041	(Dana, 1846)
Acanthastrea echinata	146.091	-17.2199	(Dana, 1846)
Acanthastrea echinata	146.015	-17.1581	(Dana, 1846)
Acanthastrea echinata	146.012	-17.1632	(Dana, 1846)
Acanthastrea echinata	146.137	-17.9233	(Dana, 1846)
Acanthastrea echinata	146.006	-17.16	(Dana, 1846)
Acanthastrea echinata	146.007	-17.1621	(Dana, 1846)
Acanthastrea echinata	150.902	-23.0852	(Dana, 1846)
Acanthastrea echinata	150.905	-23.0865	(Dana, 1846)
Acanthastrea echinata	150.963	-23.2163	(Dana, 1846)
Acanthastrea echinata	150.879	-23.2416	(Dana, 1846)
Acanthastrea echinata	150.921	-23.1623	(Dana, 1846)
Acanthastrea echinata	145.502	-16.3021	(Dana, 1846)
Acanthastrea echinata	145.526	-16.5152	(Dana, 1846)
Acanthastrea echinata	148.812	-20.2534	(Dana, 1846)
Acanthastrea echinata	148.803	-20.3017	(Dana, 1846)
Acanthastrea echinata	146.092	-17.2195	(Dana, 1846)
Acanthastrea echinata	146.077	-17.2033	(Dana, 1846)
Acanthastrea echinata	146.144	-17.9573	(Dana, 1846)
Acanthastrea echinata	146.015	-17.1584	(Dana, 1846)
Acanthastrea echinata	39.73	-4.02	(Dana, 1846)
Acanthastrea echinata	40.5397	-12.9407	(Dana, 1846)
Acanthastrea echinata	71.5	-6.2	(Dana, 1846)
Acanthastrea echinata	40.92	-2.36	(Dana, 1846)
Acanthastrea echinata	40.6851	-11.015	(Dana, 1846)
Acanthastrea echinata	59.63	-16.61	(Dana, 1846)
Acanthastrea echinata	43.33	11.5	(Dana, 1846)
Acanthastrea echinata	49.07	-12.13	(Dana, 1846)
Acanthastrea echinata	49.72	-12.76	(Dana, 1846)
Acanthastrea echinata	40.7055	-14.3762	(Dana, 1846)
Acanthastrea echinata	142.17	26.61	(Dana, 1846)
Acanthastrea echinata	144.8	-14.42	(Dana, 1846)
Acanthastrea echinata	34.9	-24.72	(Dana, 1846)
Acanthastrea echinata	130.03	32.5	(Dana, 1846)
Acanthastrea echinata	133.3	33.37	(Dana, 1846)
Acanthastrea echinata	131.8	32.67	(Dana, 1846)
Acanthastrea echinata	132.88	32.78	(Dana, 1846)
Acanthastrea echinata	144	-11.75	(Dana, 1846)
Acanthastrea echinata	113.1	-25.05	(Dana, 1846)
Acanthastrea echinata	113.77	-28.73	(Dana, 1846)
Acanthastrea echinata	146.62	-18.73	(Dana, 1846)
Acanthastrea echinata	116.63	-20.53	(Dana, 1846)
Acanthastrea echinata	152.42	-21.5	(Dana, 1846)
Acanthastrea echinata	144.07	-9.92	(Dana, 1846)
Acanthastrea echinata	146.5	-18.6	(Dana, 1846)
Acanthastrea echinata	146.5	-18.58	(Dana, 1846)
Acanthastrea echinata	146.5	-18.67	(Dana, 1846)
Acanthastrea echinata	148.92	-20.12	(Dana, 1846)
Acanthastrea echinata	150.67	-20.97	(Dana, 1846)
Acanthastrea echinata	145.48	-14.65	(Dana, 1846)
Acanthastrea echinata	146.6	-18.68	(Dana, 1846)
Acanthastrea echinata	145.4	-14.7	(Dana, 1846)
Acanthastrea echinata	151.8	-21.83	(Dana, 1846)
Acanthastrea echinata	145.55	-14.6	(Dana, 1846)
Acanthastrea echinata	151.87	-23.47	(Dana, 1846)
Acanthastrea echinata	146.5	-18.55	(Dana, 1846)
Acanthastrea echinata	152.42	-21.73	(Dana, 1846)
Acanthastrea echinata	113.7	-28.47	(Dana, 1846)
Acanthastrea echinata	48.0578	-13.3997	(Dana, 1846)
Acanthastrea echinata	48.5525	-13.0383	(Dana, 1846)
Acanthastrea echinata	48.2347	-13.1914	(Dana, 1846)
Acanthastrea echinata	48.9733	-12.2572	(Dana, 1846)
Acanthastrea echinata	48.6175	-12.8264	(Dana, 1846)
Acanthastrea echinata	48.5953	-12.8269	(Dana, 1846)
Acanthastrea echinata	48.5775	-12.855	(Dana, 1846)
Acanthastrea echinata	48.55	-12.8917	(Dana, 1846)
Acanthastrea echinata	48.7033	-12.4583	(Dana, 1846)
Acanthastrea echinata	48.1017	-13.5694	(Dana, 1846)
Acanthastrea echinata	47.9956	-13.555	(Dana, 1846)
Acanthastrea echinata	48.1617	-13.3228	(Dana, 1846)
Acanthastrea echinata	48.1847	-13.3092	(Dana, 1846)
Acanthastrea echinata	63.4203	-19.6783	(Dana, 1846)
Acanthastrea echinata	48.0578	-13.3997	(Dana, 1846)
Acanthastrea echinata	48.5525	-13.0383	(Dana, 1846)
Acanthastrea echinata	48.2347	-13.1914	(Dana, 1846)
Acanthastrea echinata	48.9733	-12.2572	(Dana, 1846)
Acanthastrea echinata	48.6175	-12.8264	(Dana, 1846)
Acanthastrea echinata	48.5953	-12.8269	(Dana, 1846)
Acanthastrea echinata	48.5775	-12.855	(Dana, 1846)
Acanthastrea echinata	48.55	-12.8917	(Dana, 1846)
Acanthastrea echinata	48.7033	-12.4583	(Dana, 1846)
Acanthastrea echinata	48.1017	-13.5694	(Dana, 1846)
Acanthastrea echinata	47.9956	-13.555	(Dana, 1846)
Acanthastrea echinata	48.1617	-13.3228	(Dana, 1846)
Acanthastrea echinata	48.1847	-13.3092	(Dana, 1846)
Acanthastrea echinata	63.4203	-19.6783	(Dana, 1846)
Acanthastrea echinata	119.286	-5.10472	(Dana, 1846)
Acanthastrea echinata	119.272	-5.03333	(Dana, 1846)
Acanthastrea echinata	119.344	-5.12361	(Dana, 1846)
Acanthastrea echinata	119.343	-4.95806	(Dana, 1846)
Acanthastrea echinata	103	5.783	(Dana, 1846)
Acanthastrea echinata	125.582	3.735	(Dana, 1846)
Acanthastrea echinata	144.17	-9.89	(Dana, 1846)
Acanthastrea echinata	151.8	-21.833	(Dana, 1846)
Acanthastrea echinata	151.905	-23.449	(Dana, 1846)
Acanthastrea echinata	151.963	-23.47	(Dana, 1846)
Acanthastrea echinata	145.491	-14.651	(Dana, 1846)
Acanthastrea echinata	145.462	-14.65	(Dana, 1846)
Acanthastrea echinata	150.508	-21.013	(Dana, 1846)
Acanthastrea echinata	150.515	-20.975	(Dana, 1846)
Acanthastrea echinata	145.468	-14.688	(Dana, 1846)
Acanthastrea echinata	144.066	-9.912	(Dana, 1846)
Acanthastrea echinata	152.416	-21.5	(Dana, 1846)
Acanthastrea echinata	142.81	-10.2	(Dana, 1846)
Acanthastrea echinata	143.02	-9.8	(Dana, 1846)
Acanthastrea echinata	152.415	-21.737	(Dana, 1846)
Acanthastrea echinata	144.815	-14.4251	(Dana, 1846)
Acanthastrea echinata	146.513	-18.682	(Dana, 1846)
Acanthastrea echinata	146.566	-18.686	(Dana, 1846)
Acanthastrea echinata	146.596	-18.693	(Dana, 1846)
Acanthastrea echinata	148.904	-20.147	(Dana, 1846)
Acanthastrea hemprichi	150.975	-23.2074	(Ehrenberg, 1834)
Acanthastrea hemprichi	148.888	-20.378	(Ehrenberg, 1834)
Acanthastrea hemprichi	148.515	-20.0795	(Ehrenberg, 1834)
Acanthastrea hemprichi	149.424	-20.9259	(Ehrenberg, 1834)
Acanthastrea hemprichi	149.389	-20.9112	(Ehrenberg, 1834)
Acanthastrea hemprichi	150.905	-23.0865	(Ehrenberg, 1834)
Acanthastrea hemprichi	150.963	-23.2163	(Ehrenberg, 1834)
Acanthastrea hemprichi	146.849	-19.1715	(Ehrenberg, 1834)
Acanthastrea hemprichi	146.855	-19.1637	(Ehrenberg, 1834)
Acanthastrea hemprichi	39.73	-4.02	(Ehrenberg, 1834)
Acanthastrea hemprichi	40.5397	-12.9407	(Ehrenberg, 1834)
Acanthastrea hemprichi	71.5	-6.2	(Ehrenberg, 1834)
Acanthastrea hemprichi	40.92	-2.36	(Ehrenberg, 1834)
Acanthastrea hemprichi	40.6851	-11.015	(Ehrenberg, 1834)
Acanthastrea hemprichi	59.63	-16.61	(Ehrenberg, 1834)
Acanthastrea hemprichi	43.33	11.5	(Ehrenberg, 1834)
Acanthastrea hemprichi	49.07	-12.13	(Ehrenberg, 1834)
Acanthastrea hemprichi	49.72	-12.76	(Ehrenberg, 1834)
Acanthastrea hemprichi	40.7055	-14.3762	(Ehrenberg, 1834)
Acanthastrea hemprichi	151.73	7.33	(Ehrenberg, 1834)
Acanthastrea hemprichi	132.88	32.78	(Ehrenberg, 1834)
Acanthastrea hemprichi	49.0675	-12.1075	(Ehrenberg, 1834)
Acanthastrea hemprichi	48.0578	-13.3997	(Ehrenberg, 1834)
Acanthastrea hemprichi	47.9533	-13.5069	(Ehrenberg, 1834)
Acanthastrea hemprichi	48.2442	-13.4856	(Ehrenberg, 1834)
Acanthastrea hemprichi	48.6625	-12.4261	(Ehrenberg, 1834)
Acanthastrea hemprichi	48.5525	-13.0383	(Ehrenberg, 1834)
Acanthastrea hemprichi	48.5447	-13.0397	(Ehrenberg, 1834)
Acanthastrea hemprichi	48.2347	-13.1914	(Ehrenberg, 1834)
Acanthastrea hemprichi	48.9575	-12.2661	(Ehrenberg, 1834)
Acanthastrea hemprichi	48.9894	-12.2397	(Ehrenberg, 1834)
Acanthastrea hemprichi	48.9733	-12.2572	(Ehrenberg, 1834)
Acanthastrea hemprichi	48.6175	-12.8264	(Ehrenberg, 1834)
Acanthastrea hemprichi	48.5953	-12.8269	(Ehrenberg, 1834)
Acanthastrea hemprichi	48.5411	-12.9358	(Ehrenberg, 1834)
Acanthastrea hemprichi	48.5775	-12.855	(Ehrenberg, 1834)
Acanthastrea hemprichi	48.55	-12.8917	(Ehrenberg, 1834)
Acanthastrea hemprichi	48.9714	-12.2706	(Ehrenberg, 1834)
Acanthastrea hemprichi	48.7033	-12.4583	(Ehrenberg, 1834)
Acanthastrea hemprichi	48.1017	-13.5694	(Ehrenberg, 1834)
Acanthastrea hemprichi	47.9956	-13.555	(Ehrenberg, 1834)
Acanthastrea hemprichi	48.1617	-13.3228	(Ehrenberg, 1834)
Acanthastrea hemprichi	48.1847	-13.3092	(Ehrenberg, 1834)
Acanthastrea hemprichi	49.0675	-12.1075	(Ehrenberg, 1834)
Acanthastrea hemprichi	48.0578	-13.3997	(Ehrenberg, 1834)
Acanthastrea hemprichi	47.9533	-13.5069	(Ehrenberg, 1834)
Acanthastrea hemprichi	48.2442	-13.4856	(Ehrenberg, 1834)
Acanthastrea hemprichi	48.6625	-12.4261	(Ehrenberg, 1834)
Acanthastrea hemprichi	48.5525	-13.0383	(Ehrenberg, 1834)
Acanthastrea hemprichi	48.5447	-13.0397	(Ehrenberg, 1834)
Acanthastrea hemprichi	48.2347	-13.1914	(Ehrenberg, 1834)
Acanthastrea hemprichi	48.9575	-12.2661	(Ehrenberg, 1834)
Acanthastrea hemprichi	48.9894	-12.2397	(Ehrenberg, 1834)
Acanthastrea hemprichi	48.9733	-12.2572	(Ehrenberg, 1834)
Acanthastrea hemprichi	48.6175	-12.8264	(Ehrenberg, 1834)
Acanthastrea hemprichi	48.5953	-12.8269	(Ehrenberg, 1834)
Acanthastrea hemprichi	48.5411	-12.9358	(Ehrenberg, 1834)
Acanthastrea hemprichi	48.5775	-12.855	(Ehrenberg, 1834)
Acanthastrea hemprichi	48.55	-12.8917	(Ehrenberg, 1834)
Acanthastrea hemprichi	48.9714	-12.2706	(Ehrenberg, 1834)
Acanthastrea hemprichi	48.7033	-12.4583	(Ehrenberg, 1834)
Acanthastrea hemprichi	48.1017	-13.5694	(Ehrenberg, 1834)
Acanthastrea hemprichi	47.9956	-13.555	(Ehrenberg, 1834)
Acanthastrea hemprichi	48.1617	-13.3228	(Ehrenberg, 1834)
Acanthastrea hemprichi	48.1847	-13.3092	(Ehrenberg, 1834)
Acanthastrea ishigakiensis	39.73	-4.02	Veron, 1990
Acanthastrea ishigakiensis	40.5397	-12.9407	Veron, 1990
Acanthastrea ishigakiensis	71.5	-6.2	Veron, 1990
Acanthastrea ishigakiensis	40.92	-2.36	Veron, 1990
Acanthastrea ishigakiensis	40.6851	-11.015	Veron, 1990
Acanthastrea ishigakiensis	59.63	-16.61	Veron, 1990
Acanthastrea ishigakiensis	43.33	11.5	Veron, 1990
Acanthastrea ishigakiensis	49.07	-12.13	Veron, 1990
Acanthastrea ishigakiensis	49.72	-12.76	Veron, 1990
Acanthastrea ishigakiensis	40.7055	-14.3762	Veron, 1990
Acanthastrea ishigakiensis	49.0675	-12.1075	Veron, 1990
Acanthastrea ishigakiensis	49.0578	-12.1214	Veron, 1990
Acanthastrea ishigakiensis	48.0578	-13.3997	Veron, 1990
Acanthastrea ishigakiensis	47.9533	-13.5069	Veron, 1990
Acanthastrea ishigakiensis	48.2442	-13.4856	Veron, 1990
Acanthastrea ishigakiensis	48.6625	-12.4261	Veron, 1990
Acanthastrea ishigakiensis	48.9894	-12.2397	Veron, 1990
Acanthastrea ishigakiensis	48.55	-12.8917	Veron, 1990
Acanthastrea ishigakiensis	48.7033	-12.4583	Veron, 1990
Acanthastrea ishigakiensis	48.1017	-13.5694	Veron, 1990
Acanthastrea ishigakiensis	48.1847	-13.3092	Veron, 1990
Acanthastrea ishigakiensis	49.0675	-12.1075	Veron, 1990
Acanthastrea ishigakiensis	49.0578	-12.1214	Veron, 1990
Acanthastrea ishigakiensis	48.0578	-13.3997	Veron, 1990
Acanthastrea ishigakiensis	47.9533	-13.5069	Veron, 1990
Acanthastrea ishigakiensis	48.2442	-13.4856	Veron, 1990
Acanthastrea ishigakiensis	48.6625	-12.4261	Veron, 1990
Acanthastrea ishigakiensis	48.9894	-12.2397	Veron, 1990
Acanthastrea ishigakiensis	48.55	-12.8917	Veron, 1990
Acanthastrea ishigakiensis	48.7033	-12.4583	Veron, 1990
Acanthastrea ishigakiensis	48.1017	-13.5694	Veron, 1990
Acanthastrea ishigakiensis	48.1847	-13.3092	Veron, 1990
Acanthastrea minuta	119.17	-4.8	Moll & Best, 1984
Acanthastrea minuta	119.272	-5.03333	Moll & Best, 1984
Acanthastrea regularis	148.813	-20.2522	Veron, 2000
Acanthastrea regularis	148.515	-20.0795	Veron, 2000
Acanthastrea regularis	146.156	-17.7787	Veron, 2000
Acanthastrea regularis	146.144	-17.9573	Veron, 2000
Acanthastrea regularis	146.146	-17.9261	Veron, 2000
Acanthastrea regularis	146.015	-17.1581	Veron, 2000
Acanthastrea regularis	146.137	-17.9233	Veron, 2000
Acanthastrea regularis	146.006	-17.16	Veron, 2000
Acanthastrea regularis	146.007	-17.1621	Veron, 2000
Acanthastrea regularis	149.424	-20.9259	Veron, 2000
Acanthastrea regularis	149.389	-20.9112	Veron, 2000
Acanthastrea regularis	146.849	-19.1715	Veron, 2000
Acanthastrea regularis	146.855	-19.1637	Veron, 2000
Acanthastrea regularis	149.421	-20.9273	Veron, 2000
Acanthastrea regularis	149.417	-20.9074	Veron, 2000
Acanthastrea regularis	146.092	-17.2195	Veron, 2000
Acanthastrea regularis	146.159	-17.7745	Veron, 2000
Acanthastrea regularis	146.015	-17.1584	Veron, 2000
Acanthastrea regularis	39.73	-4.02	Veron, 2000
Acanthastrea regularis	40.5397	-12.9407	Veron, 2000
Acanthastrea regularis	71.5	-6.2	Veron, 2000
Acanthastrea regularis	40.92	-2.36	Veron, 2000
Acanthastrea regularis	40.6851	-11.015	Veron, 2000
Acanthastrea regularis	59.63	-16.61	Veron, 2000
Acanthastrea regularis	43.33	11.5	Veron, 2000
Acanthastrea regularis	49.07	-12.13	Veron, 2000
Acanthastrea regularis	49.72	-12.76	Veron, 2000
Acanthastrea regularis	40.7055	-14.3762	Veron, 2000
Acanthastrea regularis	150.5	-10.4	Veron, 2000
Acanthastrea rotundoflora	48.0578	-13.3997	Chevalier, 1975
Acanthastrea rotundoflora	48.5525	-13.0383	Chevalier, 1975
Acanthastrea rotundoflora	48.6175	-12.8264	Chevalier, 1975
Acanthastrea rotundoflora	48.5775	-12.855	Chevalier, 1975
Acanthastrea rotundoflora	48.55	-12.8917	Chevalier, 1975
Acanthastrea rotundoflora	48.9714	-12.2706	Chevalier, 1975
Acanthastrea rotundoflora	134.491	7.511	Chevalier, 1975
Acanthastrea rotundoflora	146.013	-17.1636	Chevalier, 1975
Acanthastrea subechinata	39.73	-4.02	Veron, 2000
Acanthastrea subechinata	40.5397	-12.9407	Veron, 2000
Acanthastrea subechinata	71.5	-6.2	Veron, 2000
Acanthastrea subechinata	40.92	-2.36	Veron, 2000
Acanthastrea subechinata	40.6851	-11.015	Veron, 2000
Acanthastrea subechinata	59.63	-16.61	Veron, 2000
Acanthastrea subechinata	43.33	11.5	Veron, 2000
Acanthastrea subechinata	49.07	-12.13	Veron, 2000
Acanthastrea subechinata	49.72	-12.76	Veron, 2000
Acanthastrea subechinata	40.7055	-14.3762	Veron, 2000
Acanthastrea subechinata	48.5525	-13.0383	Veron, 2000
Acanthastrea subechinata	48.5447	-13.0397	Veron, 2000
Acanthastrea subechinata	48.5525	-13.0383	Veron, 2000
Acanthastrea subechinata	48.5447	-13.0397	Veron, 2000
Acropora abrolhosensis	104.155	2.825	Veron, 1985
Acropora abrolhosensis	146.006	-17.16	Veron, 1985
Acropora abrolhosensis	122.93	-0.47	Veron, 1985
Acropora abrolhosensis	129.9	-0.47	Veron, 1985
Acropora abrolhosensis	129.92	-0.45	Veron, 1985
Acropora abrolhosensis	129.42	-0.08	Veron, 1985
Acropora abrolhosensis	124.8	1.77	Veron, 1985
Acropora abrolhosensis	150.1	-5.28	Veron, 1985
Acropora abrolhosensis	114	-28.5	Veron, 1985
Acropora abrolhosensis	113.79	-28.635	Veron, 1985
Acropora abrolhosensis	119.22	-5.02	Veron, 1985
Acropora abrolhosensis	119.28	-5.1	Veron, 1985
Acropora abrolhosensis	119.28	-4.97	Veron, 1985
Acropora abrolhosensis	106.53	-5.58	Veron, 1985
Acropora abrolhosensis	151.77	7.42	Veron, 1985
Acropora abrolhosensis	116.63	-20.53	Veron, 1985
Acropora abrolhosensis	118.63	4.62	Veron, 1985
Acropora abrolhosensis	119.75	-0.67	Veron, 1985
Acropora abrolhosensis	113.77	-28.73	Veron, 1985
Acropora abrotanoides	34.1	26.5
Acropora abrotanoides	-149.45	-17.63
Acropora abrotanoides	114.5	15.85
Acropora abrotanoides	-149.39	-17.68
Acropora abrotanoides	-149.4	-17.68	Dana, 1846
Acropora abrotanoides	63.4	-19.7	Brook, 1892
Acropora abrotanoides	-134.94	-23.12	Vaughan
Acropora abrotanoides	-134.95	-23.117	Vaughan
Acropora abrotanoides	119.096	-5.03167	(Gardiner, 1898)
Acropora abrotanoides	145.772	-16.118	(Lamarck, 1816)
Acropora abrotanoides	145.731	-15.6532	(Lamarck, 1816)
Acropora abrotanoides	145.417	-15.1333	(Lamarck, 1816)
Acropora abrotanoides	145.468	-15.7387	(Lamarck, 1816)
Acropora abrotanoides	145.945	-16.6517	(Lamarck, 1816)
Acropora abrotanoides	145.665	-16.267	(Lamarck, 1816)
Acropora abrotanoides	145.843	-16.406	(Lamarck, 1816)
Acropora abrotanoides	146.568	-17.575	(Lamarck, 1816)
Acropora abrotanoides	145.66	-16.2623	(Lamarck, 1816)
Acropora abrotanoides	145.672	-16.2715	(Lamarck, 1816)
Acropora abrotanoides	146.046	-16.5513	(Lamarck, 1816)
Acropora abrotanoides	145.721	-15.6587	(Lamarck, 1816)
Acropora abrotanoides	145.672	-16.214	(Lamarck, 1816)
Acropora abrotanoides	145.545	-15.7263	(Lamarck, 1816)
Acropora abrotanoides	145.948	-16.6373	(Lamarck, 1816)
Acropora abrotanoides	146.563	-17.5797	(Lamarck, 1816)
Acropora abrotanoides	146.095	-17.2253	(Lamarck, 1816)
Acropora abrotanoides	149.074	-20.1613	(Lamarck, 1816)
Acropora abrotanoides	149.055	-20.3083	(Lamarck, 1816)
Acropora abrotanoides	148.554	-19.9957	(Lamarck, 1816)
Acropora abrotanoides	145.331	-15.5052	(Lamarck, 1816)
Acropora abrotanoides	146.196	-17.0607	(Lamarck, 1816)
Acropora abrotanoides	146.578	-17.569	(Lamarck, 1816)
Acropora abrotanoides	146.201	-17.092	(Lamarck, 1816)
Acropora abrotanoides	145.545	-15.712	(Lamarck, 1816)
Acropora abrotanoides	145.833	-16.4	(Lamarck, 1816)
Acropora abrotanoides	150.975	-23.2074	(Lamarck, 1816)
Acropora abrotanoides	145.496	-16.2997	(Lamarck, 1816)
Acropora abrotanoides	149.424	-20.9259	(Lamarck, 1816)
Acropora abrotanoides	145.526	-16.5152	(Lamarck, 1816)
Acropora abrotanoides	39.73	-4.02	(Lamarck, 1816)
Acropora abrotanoides	40.5397	-12.9407	(Lamarck, 1816)
Acropora abrotanoides	71.5	-6.2	(Lamarck, 1816)
Acropora abrotanoides	40.92	-2.36	(Lamarck, 1816)
Acropora abrotanoides	40.6851	-11.015	(Lamarck, 1816)
Acropora abrotanoides	59.63	-16.61	(Lamarck, 1816)
Acropora abrotanoides	43.33	11.5	(Lamarck, 1816)
Acropora abrotanoides	49.07	-12.13	(Lamarck, 1816)
Acropora abrotanoides	49.72	-12.76	(Lamarck, 1816)
Acropora abrotanoides	40.7055	-14.3762	(Lamarck, 1816)
Acropora abrotanoides	144.03	-11.62	(Lamarck, 1816)
Acropora abrotanoides	160.42	-12.68	(Lamarck, 1816)
Acropora abrotanoides	122.35	-8.48	(Lamarck, 1816)
Acropora abrotanoides	143.9	-13.07	(Lamarck, 1816)
Acropora abrotanoides	158.67	-19.33	(Lamarck, 1816)
Acropora abrotanoides	158.25	7	(Lamarck, 1816)
Acropora abrotanoides	115.43	-8.67	(Lamarck, 1816)
Acropora abrotanoides	124.63	0.72	(Lamarck, 1816)
Acropora abrotanoides	153.5	-27	(Lamarck, 1816)
Acropora abrotanoides	127.42	26.2	(Lamarck, 1816)
Acropora abrotanoides	171.7	7.08	(Lamarck, 1816)
Acropora abrotanoides	118.4	2.08	(Lamarck, 1816)
Acropora abrotanoides	143.98	-10.77	(Lamarck, 1816)
Acropora abrotanoides	144	-11.7	(Lamarck, 1816)
Acropora abrotanoides	42.4	15.7	(Lamarck, 1816)
Acropora abrotanoides	124.98	1.75	(Lamarck, 1816)
Acropora abrotanoides	144.75	13.45	(Lamarck, 1816)
Acropora abrotanoides	152.15	-23.63	(Lamarck, 1816)
Acropora abrotanoides	113.98	-21.85	(Lamarck, 1816)
Acropora abrotanoides	55.67	-4.22	(Lamarck, 1816)
Acropora abrotanoides	153.4	-29.93	(Lamarck, 1816)
Acropora abrotanoides	152.4	-23.9	(Lamarck, 1816)
Acropora abrotanoides	146.73	-18.23	(Lamarck, 1816)
Acropora abrotanoides	166.5	-22.33	(Lamarck, 1816)
Acropora abrotanoides	122.47	-8.48	(Lamarck, 1816)
Acropora abrotanoides	146.43	-18.82	(Lamarck, 1816)
Acropora abrotanoides	55.82	-4.35	(Lamarck, 1816)
Acropora abrotanoides	143.47	-11.92	(Lamarck, 1816)
Acropora abrotanoides	151.77	7.42	(Lamarck, 1816)
Acropora abrotanoides	115.5	-8.67	(Lamarck, 1816)
Acropora abrotanoides	104.42	0.25	(Lamarck, 1816)
Acropora abrotanoides	55.55	-4.73	(Lamarck, 1816)
Acropora abrotanoides	122.17	-8.53	(Lamarck, 1816)
Acropora abrotanoides	55.47	-4.58	(Lamarck, 1816)
Acropora abrotanoides	-171.97	-13.93	(Lamarck, 1816)
Acropora abrotanoides	124.38	-8.22	(Lamarck, 1816)
Acropora abrotanoides	-171.75	-13.83	(Lamarck, 1816)
Acropora abrotanoides	124.37	-8.28	(Lamarck, 1816)
Acropora abrotanoides	147	-7	(Lamarck, 1816)
Acropora abrotanoides	48.5525	-13.0383	(Lamarck, 1816)
Acropora abrotanoides	48.5447	-13.0397	(Lamarck, 1816)
Acropora abrotanoides	49.0617	-12.1275	(Lamarck, 1816)
Acropora abrotanoides	48.9733	-12.2572	(Lamarck, 1816)
Acropora abrotanoides	48.5953	-12.8269	(Lamarck, 1816)
Acropora abrotanoides	48.5411	-12.9358	(Lamarck, 1816)
Acropora abrotanoides	48.5775	-12.855	(Lamarck, 1816)
Acropora abrotanoides	48.55	-12.8917	(Lamarck, 1816)
Acropora abrotanoides	48.7033	-12.4583	(Lamarck, 1816)
Acropora abrotanoides	48.5525	-13.0383	(Lamarck, 1816)
Acropora abrotanoides	48.5447	-13.0397	(Lamarck, 1816)
Acropora abrotanoides	49.0617	-12.1275	(Lamarck, 1816)
Acropora abrotanoides	48.9733	-12.2572	(Lamarck, 1816)
Acropora abrotanoides	48.5953	-12.8269	(Lamarck, 1816)
Acropora abrotanoides	48.5411	-12.9358	(Lamarck, 1816)
Acropora abrotanoides	48.5775	-12.855	(Lamarck, 1816)
Acropora abrotanoides	48.55	-12.8917	(Lamarck, 1816)
Acropora abrotanoides	48.7033	-12.4583	(Lamarck, 1816)
Acropora abrotanoides	113.656	-22.7	(Lamarck, 1816)
Acropora abrotanoides	113.925	-21.9555	(Lamarck, 1816)
Acropora abrotanoides	113.867	-22.1416	(Lamarck, 1816)
Acropora abrotanoides	119.17	-4.8	(Milne Edwards, 1860)
Acropora abrotanoides	120.5	-6.3	(Milne Edwards, 1860)
Acropora abrotanoides	116.63	-20.53	(Milne Edwards, 1860)
Acropora abrotanoides	63.4203	-19.6783	(Milne Edwards, 1860)
Acropora abrotanoides	63.4203	-19.6783	(Milne Edwards, 1860)
Acropora abrotanoides	144.031	-11.592	(Milne Edwards, 1860)
Acropora abrotanoides	143.901	-13.069	(Milne Edwards, 1860)
Acropora abrotanoides	158.666	-19.333	(Milne Edwards, 1860)
Acropora abrotanoides	153.486	-26.978	(Milne Edwards, 1860)
Acropora abrotanoides	144.028	-11.694	(Milne Edwards, 1860)
Acropora abrotanoides	158.85	-19.4	(Milne Edwards, 1860)
Acropora abrotanoides	143.983	-10.766	(Milne Edwards, 1860)
Acropora abrotanoides	152.181	-23.627	(Milne Edwards, 1860)
Acropora abrotanoides	152.168	-23.619	(Milne Edwards, 1860)
Acropora abrotanoides	152.155	-23.635	(Milne Edwards, 1860)
Acropora abrotanoides	152.424	-23.886	(Milne Edwards, 1860)
Acropora abrotanoides	146.638	-18.232	(Milne Edwards, 1860)
Acropora abrotanoides	143.702	-12.783	(Milne Edwards, 1860)
Acropora aculeus	119.17	-4.8	(Dana, 1846)
Acropora aculeus	120.5	-6.3	(Dana, 1846)
Acropora aculeus	104.155	2.825	(Dana, 1846)
Acropora aculeus	145.47	-15.736	(Dana, 1846)
Acropora aculeus	145.97	-16.6073	(Dana, 1846)
Acropora aculeus	145.665	-16.267	(Dana, 1846)
Acropora aculeus	145.567	-15.7833	(Dana, 1846)
Acropora aculeus	145.843	-16.406	(Dana, 1846)
Acropora aculeus	145.833	-16.4	(Dana, 1846)
Acropora aculeus	145.446	-15.643	(Dana, 1846)
Acropora aculeus	145.327	-15.5003	(Dana, 1846)
Acropora aculeus	146.385	-17.7137	(Dana, 1846)
Acropora aculeus	146.09	-17.2265	(Dana, 1846)
Acropora aculeus	146.008	-17.1518	(Dana, 1846)
Acropora aculeus	145.762	-16.1272	(Dana, 1846)
Acropora aculeus	145.687	-16.1763	(Dana, 1846)
Acropora aculeus	145.76	-16.1245	(Dana, 1846)
Acropora aculeus	145.766	-16.1138	(Dana, 1846)
Acropora aculeus	145.801	-16.394	(Dana, 1846)
Acropora aculeus	145.66	-16.2623	(Dana, 1846)
Acropora aculeus	145.56	-16.3833	(Dana, 1846)
Acropora aculeus	145.939	-16.6698	(Dana, 1846)
Acropora aculeus	145.937	-16.6858	(Dana, 1846)
Acropora aculeus	146.277	-18.1375	(Dana, 1846)
Acropora aculeus	145.523	-16.5568	(Dana, 1846)
Acropora aculeus	145.521	-16.564	(Dana, 1846)
Acropora aculeus	145.531	-16.5932	(Dana, 1846)
Acropora aculeus	149.279	-20.7995	(Dana, 1846)
Acropora aculeus	145.841	-16.0863	(Dana, 1846)
Acropora aculeus	145.774	-16.3768	(Dana, 1846)
Acropora aculeus	145.695	-16.375	(Dana, 1846)
Acropora aculeus	145.433	-15.6415	(Dana, 1846)
Acropora aculeus	145.563	-16.3875	(Dana, 1846)
Acropora aculeus	145.948	-16.6373	(Dana, 1846)
Acropora aculeus	145.383	-15.1	(Dana, 1846)
Acropora aculeus	145.327	-15.1402	(Dana, 1846)
Acropora aculeus	148.609	-20.102	(Dana, 1846)
Acropora aculeus	148.443	-20.0072	(Dana, 1846)
Acropora aculeus	148.887	-20.1657	(Dana, 1846)
Acropora aculeus	145.267	-15.1667	(Dana, 1846)
Acropora aculeus	148.932	-20.3253	(Dana, 1846)
Acropora aculeus	148.571	-20.0957	(Dana, 1846)
Acropora aculeus	148.906	-20.1455	(Dana, 1846)
Acropora aculeus	148.514	-20.0813	(Dana, 1846)
Acropora aculeus	145.544	-16.5515	(Dana, 1846)
Acropora aculeus	148.606	-20.133	(Dana, 1846)
Acropora aculeus	148.995	-20.2178	(Dana, 1846)
Acropora aculeus	145.4	-15.7138	(Dana, 1846)
Acropora aculeus	146.388	-17.7095	(Dana, 1846)
Acropora aculeus	146.423	-17.7068	(Dana, 1846)
Acropora aculeus	146.095	-17.2253	(Dana, 1846)
Acropora aculeus	146.009	-17.1652	(Dana, 1846)
Acropora aculeus	149.071	-20.1548	(Dana, 1846)
Acropora aculeus	149.074	-20.1613	(Dana, 1846)
Acropora aculeus	149.266	-20.8178	(Dana, 1846)
Acropora aculeus	149.035	-20.157	(Dana, 1846)
Acropora aculeus	149.025	-20.1672	(Dana, 1846)
Acropora aculeus	149.01	-20.1723	(Dana, 1846)
Acropora aculeus	149.043	-20.3083	(Dana, 1846)
Acropora aculeus	149.04	-20.2357	(Dana, 1846)
Acropora aculeus	149.019	-20.2402	(Dana, 1846)
Acropora aculeus	148.554	-19.9957	(Dana, 1846)
Acropora aculeus	145.643	-16.1093	(Dana, 1846)
Acropora aculeus	145.672	-16.2715	(Dana, 1846)
Acropora aculeus	145.66	-16.2878	(Dana, 1846)
Acropora aculeus	145.848	-16.4063	(Dana, 1846)
Acropora aculeus	145.417	-15.4833	(Dana, 1846)
Acropora aculeus	145.526	-16.5572	(Dana, 1846)
Acropora aculeus	146.046	-16.5513	(Dana, 1846)
Acropora aculeus	146.568	-17.575	(Dana, 1846)
Acropora aculeus	146.079	-17.2035	(Dana, 1846)
Acropora aculeus	146.074	-17.2083	(Dana, 1846)
Acropora aculeus	146.167	-17.6742	(Dana, 1846)
Acropora aculeus	149.268	-20.7968	(Dana, 1846)
Acropora aculeus	145.554	-15.7845	(Dana, 1846)
Acropora aculeus	145.417	-15.1333	(Dana, 1846)
Acropora aculeus	145.317	-15.1333	(Dana, 1846)
Acropora aculeus	145.534	-16.5932	(Dana, 1846)
Acropora aculeus	146.201	-17.092	(Dana, 1846)
Acropora aculeus	146.167	-17.6672	(Dana, 1846)
Acropora aculeus	146.015	-17.1537	(Dana, 1846)
Acropora aculeus	145.545	-15.712	(Dana, 1846)
Acropora aculeus	145.468	-15.7387	(Dana, 1846)
Acropora aculeus	145.462	-15.7433	(Dana, 1846)
Acropora aculeus	146.292	-18.1492	(Dana, 1846)
Acropora aculeus	146.283	-18.1485	(Dana, 1846)
Acropora aculeus	145.331	-15.5052	(Dana, 1846)
Acropora aculeus	145.506	-16.3048	(Dana, 1846)
Acropora aculeus	145.492	-16.2968	(Dana, 1846)
Acropora aculeus	148.951	-20.3083	(Dana, 1846)
Acropora aculeus	149.002	-20.2383	(Dana, 1846)
Acropora aculeus	148.47	-19.9943	(Dana, 1846)
Acropora aculeus	146.578	-17.569	(Dana, 1846)
Acropora aculeus	145.731	-15.6532	(Dana, 1846)
Acropora aculeus	145.545	-15.7263	(Dana, 1846)
Acropora aculeus	145.689	-16.4422	(Dana, 1846)
Acropora aculeus	145.431	-15.6382	(Dana, 1846)
Acropora aculeus	145.43	-15.6352	(Dana, 1846)
Acropora aculeus	145.997	-16.7572	(Dana, 1846)
Acropora aculeus	145.551	-16.5498	(Dana, 1846)
Acropora aculeus	146.006	-17.1593	(Dana, 1846)
Acropora aculeus	145.656	-16.2838	(Dana, 1846)
Acropora aculeus	148.624	-20.0153	(Dana, 1846)
Acropora aculeus	148.713	-20.1127	(Dana, 1846)
Acropora aculeus	145.945	-16.6517	(Dana, 1846)
Acropora aculeus	148.653	-20.1107	(Dana, 1846)
Acropora aculeus	148.934	-20.338	(Dana, 1846)
Acropora aculeus	148.987	-20.3167	(Dana, 1846)
Acropora aculeus	148.508	-20.0782	(Dana, 1846)
Acropora aculeus	148.975	-20.1755	(Dana, 1846)
Acropora aculeus	149.106	-20.266	(Dana, 1846)
Acropora aculeus	149.055	-20.3083	(Dana, 1846)
Acropora aculeus	149.032	-20.3065	(Dana, 1846)
Acropora aculeus	146.196	-17.0607	(Dana, 1846)
Acropora aculeus	146.563	-17.5797	(Dana, 1846)
Acropora aculeus	146.072	-17.2117	(Dana, 1846)
Acropora aculeus	145.497	-16.2923	(Dana, 1846)
Acropora aculeus	146.189	-17.0567	(Dana, 1846)
Acropora aculeus	146.855	-19.1637	(Dana, 1846)
Acropora aculeus	146.849	-19.1713	(Dana, 1846)
Acropora aculeus	148.886	-20.3754	(Dana, 1846)
Acropora aculeus	145.442	-15.9979	(Dana, 1846)
Acropora aculeus	146.163	-17.9611	(Dana, 1846)
Acropora aculeus	146.146	-17.9261	(Dana, 1846)
Acropora aculeus	146.015	-17.1581	(Dana, 1846)
Acropora aculeus	146.137	-17.9233	(Dana, 1846)
Acropora aculeus	150.902	-23.0852	(Dana, 1846)
Acropora aculeus	145.502	-16.3021	(Dana, 1846)
Acropora aculeus	146.868	-19.155	(Dana, 1846)
Acropora aculeus	146.849	-19.1715	(Dana, 1846)
Acropora aculeus	148.888	-20.378	(Dana, 1846)
Acropora aculeus	148.515	-20.0795	(Dana, 1846)
Acropora aculeus	146.092	-17.2195	(Dana, 1846)
Acropora aculeus	146.013	-17.1636	(Dana, 1846)
Acropora aculeus	39.73	-4.02	(Dana, 1846)
Acropora aculeus	40.5397	-12.9407	(Dana, 1846)
Acropora aculeus	71.5	-6.2	(Dana, 1846)
Acropora aculeus	40.92	-2.36	(Dana, 1846)
Acropora aculeus	40.6851	-11.015	(Dana, 1846)
Acropora aculeus	59.63	-16.61	(Dana, 1846)
Acropora aculeus	43.33	11.5	(Dana, 1846)
Acropora aculeus	49.07	-12.13	(Dana, 1846)
Acropora aculeus	49.72	-12.76	(Dana, 1846)
Acropora aculeus	40.7055	-14.3762	(Dana, 1846)
Acropora aculeus	150.12	-5.3	(Dana, 1846)
Acropora aculeus	129.9	-0.47	(Dana, 1846)
Acropora aculeus	144.03	-11.62	(Dana, 1846)
Acropora aculeus	147.28	-9.57	(Dana, 1846)
Acropora aculeus	100.23	-0.93	(Dana, 1846)
Acropora aculeus	160.42	-12.68	(Dana, 1846)
Acropora aculeus	122.07	-0.47	(Dana, 1846)
Acropora aculeus	121.62	-0.43	(Dana, 1846)
Acropora aculeus	114.8	16.2	(Dana, 1846)
Acropora aculeus	122.35	-8.48	(Dana, 1846)
Acropora aculeus	124.78	1.57	(Dana, 1846)
Acropora aculeus	158.67	-19.33	(Dana, 1846)
Acropora aculeus	158.25	7	(Dana, 1846)
Acropora aculeus	153.5	-27	(Dana, 1846)
Acropora aculeus	122.4	-8.5	(Dana, 1846)
Acropora aculeus	118.4	2.1	(Dana, 1846)
Acropora aculeus	122.33	-8.45	(Dana, 1846)
Acropora aculeus	127.42	26.2	(Dana, 1846)
Acropora aculeus	122.63	-0.42	(Dana, 1846)
Acropora aculeus	118.4	2.08	(Dana, 1846)
Acropora aculeus	150.1	-5.28	(Dana, 1846)
Acropora aculeus	158.42	-19.83	(Dana, 1846)
Acropora aculeus	147.28	-9.55	(Dana, 1846)
Acropora aculeus	147.65	-18.83	(Dana, 1846)
Acropora aculeus	144	-11.7	(Dana, 1846)
Acropora aculeus	177.05	-17.6	(Dana, 1846)
Acropora aculeus	118.27	2.27	(Dana, 1846)
Acropora aculeus	124.98	1.75	(Dana, 1846)
Acropora aculeus	118.23	2.28	(Dana, 1846)
Acropora aculeus	151.95	-23.45	(Dana, 1846)
Acropora aculeus	146.73	-18.23	(Dana, 1846)
Acropora aculeus	120.42	-8.25	(Dana, 1846)
Acropora aculeus	144.08	-9.92	(Dana, 1846)
Acropora aculeus	118.23	2.27	(Dana, 1846)
Acropora aculeus	113.79	-28.635	(Dana, 1846)
Acropora aculeus	166.5	-22.33	(Dana, 1846)
Acropora aculeus	119.22	-5.02	(Dana, 1846)
Acropora aculeus	122.08	-0.43	(Dana, 1846)
Acropora aculeus	119.28	-5.1	(Dana, 1846)
Acropora aculeus	114.05	-28.85	(Dana, 1846)
Acropora aculeus	92.37	20.58	(Dana, 1846)
Acropora aculeus	146.7	-18.78	(Dana, 1846)
Acropora aculeus	121.82	-0.33	(Dana, 1846)
Acropora aculeus	145.2	-14.72	(Dana, 1846)
Acropora aculeus	146.5	-18.6	(Dana, 1846)
Acropora aculeus	115.98	5.97	(Dana, 1846)
Acropora aculeus	143.17	-9.87	(Dana, 1846)
Acropora aculeus	143.62	-13.03	(Dana, 1846)
Acropora aculeus	146.43	-18.82	(Dana, 1846)
Acropora aculeus	119.55	23.55	(Dana, 1846)
Acropora aculeus	146.48	-18.6	(Dana, 1846)
Acropora aculeus	119.33	-5.13	(Dana, 1846)
Acropora aculeus	103.73	1.23	(Dana, 1846)
Acropora aculeus	106.53	-5.58	(Dana, 1846)
Acropora aculeus	103.85	1.22	(Dana, 1846)
Acropora aculeus	150.15	-5.5	(Dana, 1846)
Acropora aculeus	116.02	5.97	(Dana, 1846)
Acropora aculeus	118.65	4.65	(Dana, 1846)
Acropora aculeus	147.28	-9.53	(Dana, 1846)
Acropora aculeus	115.5	-8.67	(Dana, 1846)
Acropora aculeus	146.5	-18.67	(Dana, 1846)
Acropora aculeus	116.02	5.95	(Dana, 1846)
Acropora aculeus	118.77	4.6	(Dana, 1846)
Acropora aculeus	116.63	-20.53	(Dana, 1846)
Acropora aculeus	118.72	4.58	(Dana, 1846)
Acropora aculeus	122.23	-0.2	(Dana, 1846)
Acropora aculeus	146.52	-18.68	(Dana, 1846)
Acropora aculeus	146.53	-18.78	(Dana, 1846)
Acropora aculeus	114.23	-28.2	(Dana, 1846)
Acropora aculeus	146.88	-19.12	(Dana, 1846)
Acropora aculeus	119.75	-0.67	(Dana, 1846)
Acropora aculeus	149.02	-20.18	(Dana, 1846)
Acropora aculeus	146.82	-19.18	(Dana, 1846)
Acropora aculeus	125.23	1.47	(Dana, 1846)
Acropora aculeus	-171.97	-13.93	(Dana, 1846)
Acropora aculeus	125.23	1.48	(Dana, 1846)
Acropora aculeus	-171.75	-13.83	(Dana, 1846)
Acropora aculeus	147	-7	(Dana, 1846)
Acropora aculeus	124.32	-8.32	(Dana, 1846)
Acropora aculeus	-149.5	-17.67	(Dana, 1846)
Acropora aculeus	49.0675	-12.1075	(Dana, 1846)
Acropora aculeus	48.9211	-12.1869	(Dana, 1846)
Acropora aculeus	49.0578	-12.1214	(Dana, 1846)
Acropora aculeus	48.2442	-13.4856	(Dana, 1846)
Acropora aculeus	48.6625	-12.4261	(Dana, 1846)
Acropora aculeus	48.5525	-13.0383	(Dana, 1846)
Acropora aculeus	48.5447	-13.0397	(Dana, 1846)
Acropora aculeus	49.0617	-12.1275	(Dana, 1846)
Acropora aculeus	48.9575	-12.2661	(Dana, 1846)
Acropora aculeus	48.9894	-12.2397	(Dana, 1846)
Acropora aculeus	48.9733	-12.2572	(Dana, 1846)
Acropora aculeus	48.6175	-12.8264	(Dana, 1846)
Acropora aculeus	48.5953	-12.8269	(Dana, 1846)
Acropora aculeus	48.5775	-12.855	(Dana, 1846)
Acropora aculeus	48.55	-12.8917	(Dana, 1846)
Acropora aculeus	48.9714	-12.2706	(Dana, 1846)
Acropora aculeus	103.75	1.22667	(Dana, 1846)
Acropora aculeus	48.7033	-12.4583	(Dana, 1846)
Acropora aculeus	48.1017	-13.5694	(Dana, 1846)
Acropora aculeus	48.1617	-13.3228	(Dana, 1846)
Acropora aculeus	49.0675	-12.1075	(Dana, 1846)
Acropora aculeus	48.9211	-12.1869	(Dana, 1846)
Acropora aculeus	49.0578	-12.1214	(Dana, 1846)
Acropora aculeus	48.2442	-13.4856	(Dana, 1846)
Acropora aculeus	48.6625	-12.4261	(Dana, 1846)
Acropora aculeus	48.5525	-13.0383	(Dana, 1846)
Acropora aculeus	48.5447	-13.0397	(Dana, 1846)
Acropora aculeus	49.0617	-12.1275	(Dana, 1846)
Acropora aculeus	48.9575	-12.2661	(Dana, 1846)
Acropora aculeus	48.9894	-12.2397	(Dana, 1846)
Acropora aculeus	48.9733	-12.2572	(Dana, 1846)
Acropora aculeus	48.6175	-12.8264	(Dana, 1846)
Acropora aculeus	48.5953	-12.8269	(Dana, 1846)
Acropora aculeus	48.5775	-12.855	(Dana, 1846)
Acropora aculeus	48.55	-12.8917	(Dana, 1846)
Acropora aculeus	48.9714	-12.2706	(Dana, 1846)
Acropora aculeus	103.75	1.22667	(Dana, 1846)
Acropora aculeus	48.7033	-12.4583	(Dana, 1846)
Acropora aculeus	48.1017	-13.5694	(Dana, 1846)
Acropora aculeus	48.1617	-13.3228	(Dana, 1846)
Acropora aculeus	119.286	-5.10472	(Dana, 1846)
Acropora aculeus	119.329	-5.0475	(Dana, 1846)
Acropora aculeus	119.264	-5.08611	(Dana, 1846)
Acropora aculeus	143.958	-13.246	(Dana, 1846)
Acropora aculeus	144.031	-11.592	(Dana, 1846)
Acropora aculeus	158.666	-19.333	(Dana, 1846)
Acropora aculeus	143.808	-12.132	(Dana, 1846)
Acropora aculeus	144.028	-11.694	(Dana, 1846)
Acropora aculeus	143.986	-10.728	(Dana, 1846)
Acropora aculeus	143.983	-10.766	(Dana, 1846)
Acropora aculeus	152.181	-23.627	(Dana, 1846)
Acropora aculeus	150.083	-20.966	(Dana, 1846)
Acropora aculeus	152.424	-23.886	(Dana, 1846)
Acropora aculeus	146.809	-18.199	(Dana, 1846)
Acropora aculeus	146.638	-18.232	(Dana, 1846)
Acropora aculeus	145.468	-14.688	(Dana, 1846)
Acropora aculeus	146.48	-18.567	(Dana, 1846)
Acropora aculeus	146.49	-18.56	(Dana, 1846)
Acropora aculeus	143.167	-9.867	(Dana, 1846)
Acropora aculeus	146.432	-18.814	(Dana, 1846)
Acropora aculeus	143.473	-11.914	(Dana, 1846)
Acropora aculeus	146.483	-18.6	(Dana, 1846)
Acropora aculeus	144.964	-14.524	(Dana, 1846)
Acropora aculeus	146.503	-18.657	(Dana, 1846)
Acropora aculeus	146.511	-18.659	(Dana, 1846)
Acropora aculeus	146.56	-18.661	(Dana, 1846)
Acropora aculeus	146.532	-18.772	(Dana, 1846)
Acropora aculeus	146.59	-18.68	(Dana, 1846)
Acropora acuminata	123.67	10.08
Acropora acuminata	119.17	-4.8	(Verrill, 1864)
Acropora acuminata	119.7	-8.5	(Verrill, 1864)
Acropora acuminata	145.468	-15.7387	(Verrill, 1864)
Acropora acuminata	145.548	-15.726	(Verrill, 1864)
Acropora acuminata	145.47	-15.736	(Verrill, 1864)
Acropora acuminata	145.66	-16.2878	(Verrill, 1864)
Acropora acuminata	148.36	-19.9878	(Verrill, 1864)
Acropora acuminata	145.545	-15.7263	(Verrill, 1864)
Acropora acuminata	149.04	-20.2357	(Verrill, 1864)
Acropora acuminata	39.73	-4.02	(Verrill, 1864)
Acropora acuminata	40.5397	-12.9407	(Verrill, 1864)
Acropora acuminata	71.5	-6.2	(Verrill, 1864)
Acropora acuminata	40.92	-2.36	(Verrill, 1864)
Acropora acuminata	40.6851	-11.015	(Verrill, 1864)
Acropora acuminata	59.63	-16.61	(Verrill, 1864)
Acropora acuminata	43.33	11.5	(Verrill, 1864)
Acropora acuminata	49.07	-12.13	(Verrill, 1864)
Acropora acuminata	49.72	-12.76	(Verrill, 1864)
Acropora acuminata	40.7055	-14.3762	(Verrill, 1864)
Acropora acuminata	146.25	-2.25	(Verrill, 1864)
Acropora acuminata	43.42	12.67	(Verrill, 1864)
Acropora acuminata	122.07	-0.47	(Verrill, 1864)
Acropora acuminata	114.8	16.2	(Verrill, 1864)
Acropora acuminata	122.35	-8.48	(Verrill, 1864)
Acropora acuminata	124.78	1.57	(Verrill, 1864)
Acropora acuminata	115.42	-8.67	(Verrill, 1864)
Acropora acuminata	158.67	-19.33	(Verrill, 1864)
Acropora acuminata	124.33	-8.18	(Verrill, 1864)
Acropora acuminata	122.4	-8.5	(Verrill, 1864)
Acropora acuminata	118.4	2.1	(Verrill, 1864)
Acropora acuminata	124.8	1.77	(Verrill, 1864)
Acropora acuminata	127.42	26.2	(Verrill, 1864)
Acropora acuminata	118.4	2.08	(Verrill, 1864)
Acropora acuminata	158.42	-19.83	(Verrill, 1864)
Acropora acuminata	123.57	-10.08	(Verrill, 1864)
Acropora acuminata	72.92	3.93	(Verrill, 1864)
Acropora acuminata	118.25	2.3	(Verrill, 1864)
Acropora acuminata	124.98	1.75	(Verrill, 1864)
Acropora acuminata	113.98	-21.85	(Verrill, 1864)
Acropora acuminata	151.95	-23.45	(Verrill, 1864)
Acropora acuminata	146.73	-18.23	(Verrill, 1864)
Acropora acuminata	120.42	-8.25	(Verrill, 1864)
Acropora acuminata	72.78	3.62	(Verrill, 1864)
Acropora acuminata	113.79	-28.635	(Verrill, 1864)
Acropora acuminata	166.5	-22.33	(Verrill, 1864)
Acropora acuminata	119.22	-5.02	(Verrill, 1864)
Acropora acuminata	116	6.02	(Verrill, 1864)
Acropora acuminata	122.47	-8.48	(Verrill, 1864)
Acropora acuminata	119.73	-0.65	(Verrill, 1864)
Acropora acuminata	143.87	-9.78	(Verrill, 1864)
Acropora acuminata	113.75	-23.12	(Verrill, 1864)
Acropora acuminata	116	6	(Verrill, 1864)
Acropora acuminata	143.6	-12.8	(Verrill, 1864)
Acropora acuminata	42.77	13.78	(Verrill, 1864)
Acropora acuminata	116.53	-20.48	(Verrill, 1864)
Acropora acuminata	97.92	9.5	(Verrill, 1864)
Acropora acuminata	151.77	7.42	(Verrill, 1864)
Acropora acuminata	116.78	-20.45	(Verrill, 1864)
Acropora acuminata	118.72	4.58	(Verrill, 1864)
Acropora acuminata	119.75	-0.67	(Verrill, 1864)
Acropora acuminata	125.23	1.47	(Verrill, 1864)
Acropora acuminata	122.17	-8.53	(Verrill, 1864)
Acropora acuminata	-171.97	-13.93	(Verrill, 1864)
Acropora acuminata	125.23	1.48	(Verrill, 1864)
Acropora acuminata	124.37	-8.28	(Verrill, 1864)
Acropora acuminata	119.344	-5.12361	(Verrill, 1864)
Acropora acuminata	119.096	-5.03167	(Verrill, 1864)
Acropora acuminata	152.168	-23.619	(Verrill, 1864)
Acropora acuminata	146.638	-18.232	(Verrill, 1864)
Acropora acuminata	143.86	-9.775	(Verrill, 1864)
Acropora acuminata	143.626	-13.043	(Verrill, 1864)
Acropora acuminata	143.473	-11.914	(Verrill, 1864)
Acropora anthocercis	148.488	-20.0773	(Brook, 1893)
Acropora anthocercis	148.713	-20.1127	(Brook, 1893)
Acropora anthocercis	148.653	-20.1107	(Brook, 1893)
Acropora anthocercis	148.987	-20.3167	(Brook, 1893)
Acropora anthocercis	148.606	-20.133	(Brook, 1893)
Acropora anthocercis	149.106	-20.266	(Brook, 1893)
Acropora anthocercis	149.035	-20.157	(Brook, 1893)
Acropora anthocercis	149.04	-20.2357	(Brook, 1893)
Acropora anthocercis	145.643	-16.1093	(Brook, 1893)
Acropora anthocercis	145.66	-16.2623	(Brook, 1893)
Acropora anthocercis	148.571	-20.0957	(Brook, 1893)
Acropora anthocercis	146.578	-17.569	(Brook, 1893)
Acropora anthocercis	145.762	-16.1272	(Brook, 1893)
Acropora anthocercis	145.721	-15.6587	(Brook, 1893)
Acropora anthocercis	145.672	-16.2715	(Brook, 1893)
Acropora anthocercis	145.637	-16.1143	(Brook, 1893)
Acropora anthocercis	145.656	-16.2838	(Brook, 1893)
Acropora anthocercis	148.995	-20.2178	(Brook, 1893)
Acropora anthocercis	146.423	-17.7068	(Brook, 1893)
Acropora anthocercis	146.189	-17.0567	(Brook, 1893)
Acropora anthocercis	146.095	-17.2253	(Brook, 1893)
Acropora anthocercis	150.902	-23.0852	(Brook, 1893)
Acropora anthocercis	150.975	-23.2074	(Brook, 1893)
Acropora anthocercis	150.972	-23.1966	(Brook, 1893)
Acropora anthocercis	150.955	-23.2162	(Brook, 1893)
Acropora anthocercis	148.497	-20.0802	(Brook, 1893)
Acropora anthocercis	149.421	-20.9273	(Brook, 1893)
Acropora anthocercis	150.963	-23.2163	(Brook, 1893)
Acropora anthocercis	39.73	-4.02	(Brook, 1893)
Acropora anthocercis	40.5397	-12.9407	(Brook, 1893)
Acropora anthocercis	71.5	-6.2	(Brook, 1893)
Acropora anthocercis	40.92	-2.36	(Brook, 1893)
Acropora anthocercis	40.6851	-11.015	(Brook, 1893)
Acropora anthocercis	59.63	-16.61	(Brook, 1893)
Acropora anthocercis	43.33	11.5	(Brook, 1893)
Acropora anthocercis	49.07	-12.13	(Brook, 1893)
Acropora anthocercis	49.72	-12.76	(Brook, 1893)
Acropora anthocercis	40.7055	-14.3762	(Brook, 1893)
Acropora anthocercis	147.28	-9.57	(Brook, 1893)
Acropora anthocercis	160.42	-12.68	(Brook, 1893)
Acropora anthocercis	143.9	-13.07	(Brook, 1893)
Acropora anthocercis	128.33	-3.32	(Brook, 1893)
Acropora anthocercis	127.42	26.2	(Brook, 1893)
Acropora anthocercis	143.98	-10.77	(Brook, 1893)
Acropora anthocercis	144	-11.7	(Brook, 1893)
Acropora anthocercis	152.18	-23.7	(Brook, 1893)
Acropora anthocercis	113.98	-21.85	(Brook, 1893)
Acropora anthocercis	153.4	-29.93	(Brook, 1893)
Acropora anthocercis	146.73	-18.23	(Brook, 1893)
Acropora anthocercis	113.79	-28.635	(Brook, 1893)
Acropora anthocercis	145.47	-14.68	(Brook, 1893)
Acropora anthocercis	143.47	-11.92	(Brook, 1893)
Acropora anthocercis	144.82	-14.43	(Brook, 1893)
Acropora anthocercis	116.63	-20.53	(Brook, 1893)
Acropora anthocercis	150.1	-5.42	(Brook, 1893)
Acropora anthocercis	47.9533	-13.5069	(Brook, 1893)
Acropora anthocercis	48.2442	-13.4856	(Brook, 1893)
Acropora anthocercis	48.6625	-12.4261	(Brook, 1893)
Acropora anthocercis	48.5525	-13.0383	(Brook, 1893)
Acropora anthocercis	48.5447	-13.0397	(Brook, 1893)
Acropora anthocercis	48.9733	-12.2572	(Brook, 1893)
Acropora anthocercis	48.5411	-12.9358	(Brook, 1893)
Acropora anthocercis	48.9714	-12.2706	(Brook, 1893)
Acropora anthocercis	48.1617	-13.3228	(Brook, 1893)
Acropora anthocercis	48.1847	-13.3092	(Brook, 1893)
Acropora anthocercis	47.9533	-13.5069	(Brook, 1893)
Acropora anthocercis	48.2442	-13.4856	(Brook, 1893)
Acropora anthocercis	48.6625	-12.4261	(Brook, 1893)
Acropora anthocercis	48.5525	-13.0383	(Brook, 1893)
Acropora anthocercis	48.5447	-13.0397	(Brook, 1893)
Acropora anthocercis	48.9733	-12.2572	(Brook, 1893)
Acropora anthocercis	48.5411	-12.9358	(Brook, 1893)
Acropora anthocercis	48.9714	-12.2706	(Brook, 1893)
Acropora anthocercis	48.1617	-13.3228	(Brook, 1893)
Acropora anthocercis	48.1847	-13.3092	(Brook, 1893)
Acropora anthocercis	143.901	-13.069	(Brook, 1893)
Acropora anthocercis	144.028	-11.694	(Brook, 1893)
Acropora anthocercis	143.983	-10.766	(Brook, 1893)
Acropora anthocercis	152.201	-23.697	(Brook, 1893)
Acropora anthocercis	143.909	-13.246	(Brook, 1893)
Acropora anthocercis	153.386	-29.922	(Brook, 1893)
Acropora anthocercis	146.809	-18.199	(Brook, 1893)
Acropora anthocercis	146.638	-18.232	(Brook, 1893)
Acropora anthocercis	144	-9.918	(Brook, 1893)
Acropora anthocercis	143.473	-11.914	(Brook, 1893)
Acropora anthocercis	144.817	-14.4255	(Brook, 1893)
Acropora anthocercis	147.3	-18.5	Brook, 1892
Acropora appressa	39.73	-4.02	(Ehrenberg, 1834)
Acropora appressa	40.5397	-12.9407	(Ehrenberg, 1834)
Acropora appressa	71.5	-6.2	(Ehrenberg, 1834)
Acropora appressa	40.92	-2.36	(Ehrenberg, 1834)
Acropora appressa	40.6851	-11.015	(Ehrenberg, 1834)
Acropora appressa	59.63	-16.61	(Ehrenberg, 1834)
Acropora appressa	43.33	11.5	(Ehrenberg, 1834)
Acropora appressa	49.07	-12.13	(Ehrenberg, 1834)
Acropora appressa	49.72	-12.76	(Ehrenberg, 1834)
Acropora appressa	40.7055	-14.3762	(Ehrenberg, 1834)
Acropora appressa	49.0578	-12.1214	(Ehrenberg, 1834)
Acropora appressa	47.9533	-13.5069	(Ehrenberg, 1834)
Acropora appressa	48.6625	-12.4261	(Ehrenberg, 1834)
Acropora appressa	48.5447	-13.0397	(Ehrenberg, 1834)
Acropora appressa	48.2347	-13.1914	(Ehrenberg, 1834)
Acropora appressa	48.9575	-12.2661	(Ehrenberg, 1834)
Acropora appressa	48.9733	-12.2572	(Ehrenberg, 1834)
Acropora appressa	48.1847	-13.3092	(Ehrenberg, 1834)
Acropora appressa	49.0578	-12.1214	(Ehrenberg, 1834)
Acropora appressa	47.9533	-13.5069	(Ehrenberg, 1834)
Acropora appressa	48.6625	-12.4261	(Ehrenberg, 1834)
Acropora appressa	48.5447	-13.0397	(Ehrenberg, 1834)
Acropora appressa	48.2347	-13.1914	(Ehrenberg, 1834)
Acropora appressa	48.9575	-12.2661	(Ehrenberg, 1834)
Acropora appressa	48.9733	-12.2572	(Ehrenberg, 1834)
Acropora appressa	48.1847	-13.3092	(Ehrenberg, 1834)
Acropora arabensis	50.93	27.1	Hodgson & Carpenter, 1995
Acropora arabensis	50.17	27.6	Hodgson & Carpenter, 1995
Acropora arabensis	49.9	27.37	Hodgson & Carpenter, 1995
Acropora arabensis	48.77	28.83	Hodgson & Carpenter, 1995
Acropora arabensis	49.83	27.33	Hodgson & Carpenter, 1995
Acropora arabensis	49.83	27.73	Hodgson & Carpenter, 1995
Acropora arabensis	48.6	29.03	Hodgson & Carpenter, 1995
Acropora arabensis	48.47	29.07	Hodgson & Carpenter, 1995
Acropora arabensis	48.5	29.08	Hodgson & Carpenter, 1995
Acropora arabensis	49.03	27.73	Hodgson & Carpenter, 1995
Acropora arabensis	49.0675	-12.1075	Hodgson & Carpenter, 1995
Acropora arabensis	49.0578	-12.1214	Hodgson & Carpenter, 1995
Acropora arabensis	47.9533	-13.5069	Hodgson & Carpenter, 1995
Acropora arabensis	48.2442	-13.4856	Hodgson & Carpenter, 1995
Acropora arabensis	48.6625	-12.4261	Hodgson & Carpenter, 1995
Acropora arabensis	48.5525	-13.0383	Hodgson & Carpenter, 1995
Acropora arabensis	48.5447	-13.0397	Hodgson & Carpenter, 1995
Acropora arabensis	49.0617	-12.1275	Hodgson & Carpenter, 1995
Acropora arabensis	48.2347	-13.1914	Hodgson & Carpenter, 1995
Acropora arabensis	48.6175	-12.8264	Hodgson & Carpenter, 1995
Acropora arabensis	48.5953	-12.8269	Hodgson & Carpenter, 1995
Acropora arabensis	48.5411	-12.9358	Hodgson & Carpenter, 1995
Acropora arabensis	48.5775	-12.855	Hodgson & Carpenter, 1995
Acropora arabensis	48.55	-12.8917	Hodgson & Carpenter, 1995
Acropora arabensis	48.7033	-12.4583	Hodgson & Carpenter, 1995
Acropora arabensis	47.9956	-13.555	Hodgson & Carpenter, 1995
Acropora arabensis	48.1617	-13.3228	Hodgson & Carpenter, 1995
Acropora arabensis	49.0675	-12.1075	Hodgson & Carpenter, 1995
Acropora arabensis	49.0578	-12.1214	Hodgson & Carpenter, 1995
Acropora arabensis	47.9533	-13.5069	Hodgson & Carpenter, 1995
Acropora arabensis	48.2442	-13.4856	Hodgson & Carpenter, 1995
Acropora arabensis	48.6625	-12.4261	Hodgson & Carpenter, 1995
Acropora arabensis	48.5525	-13.0383	Hodgson & Carpenter, 1995
Acropora arabensis	48.5447	-13.0397	Hodgson & Carpenter, 1995
Acropora arabensis	49.0617	-12.1275	Hodgson & Carpenter, 1995
Acropora arabensis	48.2347	-13.1914	Hodgson & Carpenter, 1995
Acropora arabensis	48.6175	-12.8264	Hodgson & Carpenter, 1995
Acropora arabensis	48.5953	-12.8269	Hodgson & Carpenter, 1995
Acropora arabensis	48.5411	-12.9358	Hodgson & Carpenter, 1995
Acropora arabensis	48.5775	-12.855	Hodgson & Carpenter, 1995
Acropora arabensis	48.55	-12.8917	Hodgson & Carpenter, 1995
Acropora arabensis	48.7033	-12.4583	Hodgson & Carpenter, 1995
Acropora arabensis	47.9956	-13.555	Hodgson & Carpenter, 1995
Acropora arabensis	48.1617	-13.3228	Hodgson & Carpenter, 1995
Acropora aspera	34.1	26.5
Acropora aspera	146.58	-18.67	Dana, 1846
Acropora aspera	-149.45	-17.63	Dana, 1846
Acropora aspera	151.95	-23.45	Dana, 1846
Acropora aspera	120.95	13.52	(Dana, 1846)
Acropora aspera	120.91	13.51	(Dana, 1846)
Acropora aspera	98.4089	12.1731	(Dana, 1846)
Acropora aspera	98.4089	12.1731	(Dana, 1846)
Acropora aspera	119.17	-4.8	(Dana, 1846)
Acropora aspera	104.155	2.825	(Dana, 1846)
Acropora aspera	145.772	-16.118	(Dana, 1846)
Acropora aspera	145.766	-16.1138	(Dana, 1846)
Acropora aspera	145.555	-15.7263	(Dana, 1846)
Acropora aspera	145.548	-15.726	(Dana, 1846)
Acropora aspera	145.417	-15.1333	(Dana, 1846)
Acropora aspera	146.074	-17.2083	(Dana, 1846)
Acropora aspera	146.009	-17.1652	(Dana, 1846)
Acropora aspera	145.672	-16.214	(Dana, 1846)
Acropora aspera	146.09	-17.2265	(Dana, 1846)
Acropora aspera	146.008	-17.1518	(Dana, 1846)
Acropora aspera	145.762	-16.1272	(Dana, 1846)
Acropora aspera	145.695	-16.375	(Dana, 1846)
Acropora aspera	145.801	-16.394	(Dana, 1846)
Acropora aspera	145.431	-15.6382	(Dana, 1846)
Acropora aspera	145.567	-16.3795	(Dana, 1846)
Acropora aspera	145.56	-16.3833	(Dana, 1846)
Acropora aspera	145.561	-16.3925	(Dana, 1846)
Acropora aspera	145.327	-15.1402	(Dana, 1846)
Acropora aspera	146.079	-17.2035	(Dana, 1846)
Acropora aspera	145.563	-16.3875	(Dana, 1846)
Acropora aspera	145.558	-16.3863	(Dana, 1846)
Acropora aspera	146.283	-18.1485	(Dana, 1846)
Acropora aspera	148.514	-20.0813	(Dana, 1846)
Acropora aspera	148.508	-20.0782	(Dana, 1846)
Acropora aspera	146.423	-17.7068	(Dana, 1846)
Acropora aspera	146.095	-17.2253	(Dana, 1846)
Acropora aspera	149.074	-20.1613	(Dana, 1846)
Acropora aspera	149.281	-20.8193	(Dana, 1846)
Acropora aspera	149.287	-20.8087	(Dana, 1846)
Acropora aspera	145.66	-16.2623	(Dana, 1846)
Acropora aspera	148.488	-20.0773	(Dana, 1846)
Acropora aspera	145.843	-16.0732	(Dana, 1846)
Acropora aspera	145.937	-16.6858	(Dana, 1846)
Acropora aspera	145.372	-14.6942	(Dana, 1846)
Acropora aspera	148.713	-20.1127	(Dana, 1846)
Acropora aspera	145.191	-14.7128	(Dana, 1846)
Acropora aspera	145.257	-14.6505	(Dana, 1846)
Acropora aspera	145.186	-14.7155	(Dana, 1846)
Acropora aspera	146.849	-19.1713	(Dana, 1846)
Acropora aspera	146.855	-19.1637	(Dana, 1846)
Acropora aspera	146.077	-17.2041	(Dana, 1846)
Acropora aspera	39.73	-4.02	(Dana, 1846)
Acropora aspera	40.5397	-12.9407	(Dana, 1846)
Acropora aspera	71.5	-6.2	(Dana, 1846)
Acropora aspera	40.92	-2.36	(Dana, 1846)
Acropora aspera	40.6851	-11.015	(Dana, 1846)
Acropora aspera	59.63	-16.61	(Dana, 1846)
Acropora aspera	43.33	11.5	(Dana, 1846)
Acropora aspera	49.07	-12.13	(Dana, 1846)
Acropora aspera	49.72	-12.76	(Dana, 1846)
Acropora aspera	40.7055	-14.3762	(Dana, 1846)
Acropora aspera	150.12	-5.3	(Dana, 1846)
Acropora aspera	122.93	-0.47	(Dana, 1846)
Acropora aspera	158.67	-19.33	(Dana, 1846)
Acropora aspera	158.25	7	(Dana, 1846)
Acropora aspera	118.4	2.1	(Dana, 1846)
Acropora aspera	127.42	26.2	(Dana, 1846)
Acropora aspera	147.45	-18.42	(Dana, 1846)
Acropora aspera	158.42	-19.83	(Dana, 1846)
Acropora aspera	147.65	-18.83	(Dana, 1846)
Acropora aspera	144	-11.7	(Dana, 1846)
Acropora aspera	124.98	1.75	(Dana, 1846)
Acropora aspera	144.75	13.45	(Dana, 1846)
Acropora aspera	150.08	-20.97	(Dana, 1846)
Acropora aspera	152.08	-23.5	(Dana, 1846)
Acropora aspera	125.62	-13.93	(Dana, 1846)
Acropora aspera	151.92	-23.45	(Dana, 1846)
Acropora aspera	114.3	-22.1	(Dana, 1846)
Acropora aspera	145.45	-14.65	(Dana, 1846)
Acropora aspera	113.75	-23	(Dana, 1846)
Acropora aspera	113.79	-28.635	(Dana, 1846)
Acropora aspera	148.17	-19.22	(Dana, 1846)
Acropora aspera	145.47	-14.67	(Dana, 1846)
Acropora aspera	119.22	-5.02	(Dana, 1846)
Acropora aspera	145.45	-14.67	(Dana, 1846)
Acropora aspera	145.5	-14.7	(Dana, 1846)
Acropora aspera	119.28	-5.1	(Dana, 1846)
Acropora aspera	145.45	-15.75	(Dana, 1846)
Acropora aspera	132.08	-11.07	(Dana, 1846)
Acropora aspera	114.05	-28.85	(Dana, 1846)
Acropora aspera	103.75	1.17	(Dana, 1846)
Acropora aspera	145.2	-14.72	(Dana, 1846)
Acropora aspera	146.5	-18.6	(Dana, 1846)
Acropora aspera	124.97	-14.42	(Dana, 1846)
Acropora aspera	146.43	-18.82	(Dana, 1846)
Acropora aspera	142.83	-10.22	(Dana, 1846)
Acropora aspera	144.82	-14.43	(Dana, 1846)
Acropora aspera	144.97	-14.52	(Dana, 1846)
Acropora aspera	146.5	-18.62	(Dana, 1846)
Acropora aspera	100.93	12.57	(Dana, 1846)
Acropora aspera	104.42	0.25	(Dana, 1846)
Acropora aspera	146.53	-18.78	(Dana, 1846)
Acropora aspera	150.1	-5.42	(Dana, 1846)
Acropora aspera	146.57	-18.78	(Dana, 1846)
Acropora aspera	146.57	-18.72	(Dana, 1846)
Acropora aspera	146.82	-19.18	(Dana, 1846)
Acropora aspera	124	10	(Dana, 1846)
Acropora aspera	122.17	-8.53	(Dana, 1846)
Acropora aspera	-171.97	-13.93	(Dana, 1846)
Acropora aspera	-171.75	-13.83	(Dana, 1846)
Acropora aspera	113.17	-24.75	(Dana, 1846)
Acropora aspera	113.16	-26.13	(Dana, 1846)
Acropora aspera	116.63	-20.53	(Dana, 1846)
Acropora aspera	49.0617	-12.1275	(Dana, 1846)
Acropora aspera	48.2347	-13.1914	(Dana, 1846)
Acropora aspera	48.55	-12.8917	(Dana, 1846)
Acropora aspera	48.1017	-13.5694	(Dana, 1846)
Acropora aspera	49.0617	-12.1275	(Dana, 1846)
Acropora aspera	48.2347	-13.1914	(Dana, 1846)
Acropora aspera	48.55	-12.8917	(Dana, 1846)
Acropora aspera	48.1017	-13.5694	(Dana, 1846)
Acropora aspera	119.096	-5.03167	(Dana, 1846)
Acropora aspera	119.286	-5.10472	(Dana, 1846)
Acropora aspera	119.286	-4.96917	(Dana, 1846)
Acropora aspera	119.272	-5.03333	(Dana, 1846)
Acropora aspera	119.344	-5.12361	(Dana, 1846)
Acropora aspera	119.343	-4.95806	(Dana, 1846)
Acropora aspera	119.325	-5.01167	(Dana, 1846)
Acropora aspera	158.666	-19.333	(Dana, 1846)
Acropora aspera	144.028	-11.694	(Dana, 1846)
Acropora aspera	158.85	-19.4	(Dana, 1846)
Acropora aspera	150.083	-20.966	(Dana, 1846)
Acropora aspera	146.638	-18.232	(Dana, 1846)
Acropora aspera	145.448	-14.663	(Dana, 1846)
Acropora aspera	146.49	-18.56	(Dana, 1846)
Acropora aspera	145.194	-14.732	(Dana, 1846)
Acropora aspera	142.81	-10.2	(Dana, 1846)
Acropora aspera	143.473	-11.914	(Dana, 1846)
Acropora aspera	144.817	-14.4255	(Dana, 1846)
Acropora aspera	144.964	-14.524	(Dana, 1846)
Acropora aspera	146.513	-18.682	(Dana, 1846)
Acropora aspera	146.69	-18.73	(Dana, 1846)
Acropora aspera	146.56	-18.661	(Dana, 1846)
Acropora aspera	146.592	-18.761	(Dana, 1846)
Acropora aspera	113.925	-21.9555	(Dana, 1846)
Acropora aspera	113.769	-23.3194	(Dana, 1846)
Acropora austera	120.5	-6.3	(Dana, 1846)
Acropora austera	119.7	-8.5	(Dana, 1846)
Acropora austera	104.155	2.825	(Dana, 1846)
Acropora austera	145.731	-15.6532	(Dana, 1846)
Acropora austera	145.637	-16.1143	(Dana, 1846)
Acropora austera	145.843	-16.406	(Dana, 1846)
Acropora austera	145.848	-16.4063	(Dana, 1846)
Acropora austera	146.201	-17.092	(Dana, 1846)
Acropora austera	146.385	-17.7137	(Dana, 1846)
Acropora austera	146.09	-17.2265	(Dana, 1846)
Acropora austera	145.762	-16.1272	(Dana, 1846)
Acropora austera	145.766	-16.1138	(Dana, 1846)
Acropora austera	145.672	-16.2715	(Dana, 1846)
Acropora austera	145.937	-16.6858	(Dana, 1846)
Acropora austera	145.841	-16.0863	(Dana, 1846)
Acropora austera	145.774	-16.3768	(Dana, 1846)
Acropora austera	145.47	-15.736	(Dana, 1846)
Acropora austera	145.468	-15.7387	(Dana, 1846)
Acropora austera	145.948	-16.6373	(Dana, 1846)
Acropora austera	148.887	-20.1657	(Dana, 1846)
Acropora austera	148.514	-20.0813	(Dana, 1846)
Acropora austera	148.975	-20.1755	(Dana, 1846)
Acropora austera	146.563	-17.5797	(Dana, 1846)
Acropora austera	149.071	-20.1548	(Dana, 1846)
Acropora austera	149.074	-20.1613	(Dana, 1846)
Acropora austera	149.106	-20.266	(Dana, 1846)
Acropora austera	149.019	-20.2402	(Dana, 1846)
Acropora austera	145.665	-16.267	(Dana, 1846)
Acropora austera	145.656	-16.2838	(Dana, 1846)
Acropora austera	145.327	-15.1402	(Dana, 1846)
Acropora austera	146.568	-17.575	(Dana, 1846)
Acropora austera	145.687	-16.1763	(Dana, 1846)
Acropora austera	145.672	-16.214	(Dana, 1846)
Acropora austera	145.417	-15.1333	(Dana, 1846)
Acropora austera	145.772	-16.118	(Dana, 1846)
Acropora austera	145.545	-15.712	(Dana, 1846)
Acropora austera	145.554	-15.7845	(Dana, 1846)
Acropora austera	146.189	-17.0567	(Dana, 1846)
Acropora austera	146.074	-17.2067	(Dana, 1846)
Acropora austera	145.721	-15.6587	(Dana, 1846)
Acropora austera	145.643	-16.1093	(Dana, 1846)
Acropora austera	145.555	-15.7263	(Dana, 1846)
Acropora austera	145.548	-15.726	(Dana, 1846)
Acropora austera	145.689	-16.4422	(Dana, 1846)
Acropora austera	145.561	-16.3925	(Dana, 1846)
Acropora austera	145.401	-15.716	(Dana, 1846)
Acropora austera	148.713	-20.1127	(Dana, 1846)
Acropora austera	148.508	-20.0782	(Dana, 1846)
Acropora austera	149.04	-20.2357	(Dana, 1846)
Acropora austera	146.046	-16.5513	(Dana, 1846)
Acropora austera	145.257	-14.6505	(Dana, 1846)
Acropora austera	145.197	-14.731	(Dana, 1846)
Acropora austera	145.997	-16.7572	(Dana, 1846)
Acropora austera	151.93	-23.4605	(Dana, 1846)
Acropora austera	149.424	-20.9259	(Dana, 1846)
Acropora austera	146.077	-17.2033	(Dana, 1846)
Acropora austera	39.73	-4.02	(Dana, 1846)
Acropora austera	40.5397	-12.9407	(Dana, 1846)
Acropora austera	71.5	-6.2	(Dana, 1846)
Acropora austera	40.92	-2.36	(Dana, 1846)
Acropora austera	40.6851	-11.015	(Dana, 1846)
Acropora austera	59.63	-16.61	(Dana, 1846)
Acropora austera	43.33	11.5	(Dana, 1846)
Acropora austera	49.07	-12.13	(Dana, 1846)
Acropora austera	49.72	-12.76	(Dana, 1846)
Acropora austera	40.7055	-14.3762	(Dana, 1846)
Acropora austera	122.93	-0.47	(Dana, 1846)
Acropora austera	55.22	-3.72	(Dana, 1846)
Acropora austera	144.03	-11.62	(Dana, 1846)
Acropora austera	114.8	16.2	(Dana, 1846)
Acropora austera	122.35	-8.48	(Dana, 1846)
Acropora austera	124.78	1.57	(Dana, 1846)
Acropora austera	115.42	-8.67	(Dana, 1846)
Acropora austera	150.82	-17.43	(Dana, 1846)
Acropora austera	158.67	-19.33	(Dana, 1846)
Acropora austera	158.25	7	(Dana, 1846)
Acropora austera	124.33	-8.18	(Dana, 1846)
Acropora austera	160.33	-12.57	(Dana, 1846)
Acropora austera	124.63	0.72	(Dana, 1846)
Acropora austera	153.5	-27	(Dana, 1846)
Acropora austera	122.4	-8.5	(Dana, 1846)
Acropora austera	118.4	2.1	(Dana, 1846)
Acropora austera	124.8	1.77	(Dana, 1846)
Acropora austera	127.42	26.2	(Dana, 1846)
Acropora austera	122.63	-0.42	(Dana, 1846)
Acropora austera	171.7	7.08	(Dana, 1846)
Acropora austera	147.27	-18.75	(Dana, 1846)
Acropora austera	147.07	-18.63	(Dana, 1846)
Acropora austera	123.57	-10.08	(Dana, 1846)
Acropora austera	147.28	-9.55	(Dana, 1846)
Acropora austera	42.38	15.5	(Dana, 1846)
Acropora austera	143.98	-10.77	(Dana, 1846)
Acropora austera	147.65	-18.83	(Dana, 1846)
Acropora austera	144	-11.7	(Dana, 1846)
Acropora austera	118.25	2.3	(Dana, 1846)
Acropora austera	124.98	1.75	(Dana, 1846)
Acropora austera	117.67	-8.17	(Dana, 1846)
Acropora austera	144.75	13.45	(Dana, 1846)
Acropora austera	152.18	-23.7	(Dana, 1846)
Acropora austera	152.15	-23.63	(Dana, 1846)
Acropora austera	150.08	-20.97	(Dana, 1846)
Acropora austera	113.98	-21.85	(Dana, 1846)
Acropora austera	55.67	-4.22	(Dana, 1846)
Acropora austera	152.4	-23.9	(Dana, 1846)
Acropora austera	71.77	-5.27	(Dana, 1846)
Acropora austera	152.28	-19.08	(Dana, 1846)
Acropora austera	151.95	-23.45	(Dana, 1846)
Acropora austera	146.73	-18.23	(Dana, 1846)
Acropora austera	55.83	-4.38	(Dana, 1846)
Acropora austera	145.48	-14.65	(Dana, 1846)
Acropora austera	144.08	-9.92	(Dana, 1846)
Acropora austera	72.78	3.62	(Dana, 1846)
Acropora austera	145.45	-14.65	(Dana, 1846)
Acropora austera	118.23	2.27	(Dana, 1846)
Acropora austera	113.75	-23	(Dana, 1846)
Acropora austera	145.42	-14.65	(Dana, 1846)
Acropora austera	148.17	-19.22	(Dana, 1846)
Acropora austera	166.5	-22.33	(Dana, 1846)
Acropora austera	145.5	-14.7	(Dana, 1846)
Acropora austera	153.13	-26.63	(Dana, 1846)
Acropora austera	146.7	-18.78	(Dana, 1846)
Acropora austera	145.2	-14.72	(Dana, 1846)
Acropora austera	143.87	-9.78	(Dana, 1846)
Acropora austera	146.5	-18.6	(Dana, 1846)
Acropora austera	143.17	-9.87	(Dana, 1846)
Acropora austera	143.62	-13.03	(Dana, 1846)
Acropora austera	146.43	-18.82	(Dana, 1846)
Acropora austera	55.82	-4.35	(Dana, 1846)
Acropora austera	143.02	-11.55	(Dana, 1846)
Acropora austera	143.47	-11.92	(Dana, 1846)
Acropora austera	146.48	-18.6	(Dana, 1846)
Acropora austera	144.97	-14.5	(Dana, 1846)
Acropora austera	144.97	-14.52	(Dana, 1846)
Acropora austera	149.5	-21.47	(Dana, 1846)
Acropora austera	116.57	-20.45	(Dana, 1846)
Acropora austera	97.92	9.5	(Dana, 1846)
Acropora austera	106.53	-5.58	(Dana, 1846)
Acropora austera	106.52	-5.52	(Dana, 1846)
Acropora austera	119.92	16.38	(Dana, 1846)
Acropora austera	115.5	-8.67	(Dana, 1846)
Acropora austera	116.63	-20.53	(Dana, 1846)
Acropora austera	146.52	-18.68	(Dana, 1846)
Acropora austera	146.53	-18.78	(Dana, 1846)
Acropora austera	146.57	-18.67	(Dana, 1846)
Acropora austera	146.53	-18.77	(Dana, 1846)
Acropora austera	146.57	-18.72	(Dana, 1846)
Acropora austera	55.53	-4.73	(Dana, 1846)
Acropora austera	55.42	-4.6	(Dana, 1846)
Acropora austera	122.17	-8.53	(Dana, 1846)
Acropora austera	45.08	-12.83	(Dana, 1846)
Acropora austera	55.47	-4.58	(Dana, 1846)
Acropora austera	148.85	-20.33	(Dana, 1846)
Acropora austera	-171.97	-13.93	(Dana, 1846)
Acropora austera	125.23	1.48	(Dana, 1846)
Acropora austera	124.35	-8.22	(Dana, 1846)
Acropora austera	124.38	-8.22	(Dana, 1846)
Acropora austera	124.35	-8.27	(Dana, 1846)
Acropora austera	124.32	-8.32	(Dana, 1846)
Acropora austera	124.32	-8.3	(Dana, 1846)
Acropora austera	124.3	-8.33	(Dana, 1846)
Acropora austera	-149.5	-17.67	(Dana, 1846)
Acropora austera	47.9533	-13.5069	(Dana, 1846)
Acropora austera	48.5525	-13.0383	(Dana, 1846)
Acropora austera	48.5447	-13.0397	(Dana, 1846)
Acropora austera	49.0617	-12.1275	(Dana, 1846)
Acropora austera	48.2347	-13.1914	(Dana, 1846)
Acropora austera	48.9575	-12.2661	(Dana, 1846)
Acropora austera	48.9894	-12.2397	(Dana, 1846)
Acropora austera	48.9733	-12.2572	(Dana, 1846)
Acropora austera	48.5953	-12.8269	(Dana, 1846)
Acropora austera	48.5775	-12.855	(Dana, 1846)
Acropora austera	48.55	-12.8917	(Dana, 1846)
Acropora austera	48.9714	-12.2706	(Dana, 1846)
Acropora austera	48.1617	-13.3228	(Dana, 1846)
Acropora austera	48.1847	-13.3092	(Dana, 1846)
Acropora austera	47.9533	-13.5069	(Dana, 1846)
Acropora austera	48.5525	-13.0383	(Dana, 1846)
Acropora austera	48.5447	-13.0397	(Dana, 1846)
Acropora austera	49.0617	-12.1275	(Dana, 1846)
Acropora austera	48.2347	-13.1914	(Dana, 1846)
Acropora austera	48.9575	-12.2661	(Dana, 1846)
Acropora austera	48.9894	-12.2397	(Dana, 1846)
Acropora austera	48.9733	-12.2572	(Dana, 1846)
Acropora austera	48.5953	-12.8269	(Dana, 1846)
Acropora austera	48.5775	-12.855	(Dana, 1846)
Acropora austera	48.55	-12.8917	(Dana, 1846)
Acropora austera	48.9714	-12.2706	(Dana, 1846)
Acropora austera	48.1617	-13.3228	(Dana, 1846)
Acropora austera	48.1847	-13.3092	(Dana, 1846)
Acropora austera	119.329	-5.0475	(Dana, 1846)
Acropora austera	119.272	-5.03333	(Dana, 1846)
Acropora austera	144.031	-11.592	(Dana, 1846)
Acropora austera	158.666	-19.333	(Dana, 1846)
Acropora austera	153.486	-26.978	(Dana, 1846)
Acropora austera	143.983	-10.766	(Dana, 1846)
Acropora austera	152.181	-23.627	(Dana, 1846)
Acropora austera	152.168	-23.619	(Dana, 1846)
Acropora austera	152.201	-23.697	(Dana, 1846)
Acropora austera	143.909	-13.246	(Dana, 1846)
Acropora austera	152.155	-23.635	(Dana, 1846)
Acropora austera	150.083	-20.966	(Dana, 1846)
Acropora austera	150.087	-20.951	(Dana, 1846)
Acropora austera	152.4	-23.9	(Dana, 1846)
Acropora austera	146.638	-18.232	(Dana, 1846)
Acropora austera	152.278	-19.098	(Dana, 1846)
Acropora austera	146.48	-18.567	(Dana, 1846)
Acropora austera	143.86	-9.775	(Dana, 1846)
Acropora austera	145.194	-14.732	(Dana, 1846)
Acropora austera	143.167	-9.867	(Dana, 1846)
Acropora austera	143.626	-13.043	(Dana, 1846)
Acropora austera	143.473	-11.914	(Dana, 1846)
Acropora austera	144.974	-14.492	(Dana, 1846)
Acropora austera	144.964	-14.524	(Dana, 1846)
Acropora austera	146.511	-18.659	(Dana, 1846)
Acropora austera	146.69	-18.76	(Dana, 1846)
Acropora austera	146.56	-18.661	(Dana, 1846)
Acropora austera	146.532	-18.772	(Dana, 1846)
Acropora austera	148.85	-20.333	(Dana, 1846)
Acropora austera	113.744	-23.1194	(Dana, 1846)
Acropora austera	113.925	-21.9555	(Dana, 1846)
Acropora austera	113.922	-21.9777	(Dana, 1846)
Acropora awi	104.155	2.825	Wallace & Wolstenholme, 1998
Acropora awi	150.12	-5.3	Wallace & Wolstenholme, 1998
Acropora awi	124.8	1.77	Wallace & Wolstenholme, 1998
Acropora awi	118.4	2.08	Wallace & Wolstenholme, 1998
Acropora awi	123.57	-10.08	Wallace & Wolstenholme, 1998
Acropora awi	119.2	-4.97	Wallace & Wolstenholme, 1998
Acropora awi	118.23	2.27	Wallace & Wolstenholme, 1998
Acropora awi	119.22	-5.02	Wallace & Wolstenholme, 1998
Acropora awi	119.28	-5.1	Wallace & Wolstenholme, 1998
Acropora awi	122.23	-0.2	Wallace & Wolstenholme, 1998
Acropora awi	150.12	-5.47	Wallace & Wolstenholme, 1998
Acropora awi	119.75	-0.67	Wallace & Wolstenholme, 1998
Acropora batunai	122.07	-0.47	Wallace, 1997
Acropora batunai	121.62	-0.43	Wallace, 1997
Acropora batunai	122.08	-0.43	Wallace, 1997
Acropora batunai	147.28	-9.53	Wallace, 1997
Acropora bifurcata	39.73	-4.02	Nemenzo, 1971
Acropora bifurcata	40.5397	-12.9407	Nemenzo, 1971
Acropora bifurcata	71.5	-6.2	Nemenzo, 1971
Acropora bifurcata	40.92	-2.36	Nemenzo, 1971
Acropora bifurcata	40.6851	-11.015	Nemenzo, 1971
Acropora bifurcata	59.63	-16.61	Nemenzo, 1971
Acropora bifurcata	43.33	11.5	Nemenzo, 1971
Acropora bifurcata	49.07	-12.13	Nemenzo, 1971
Acropora bifurcata	49.72	-12.76	Nemenzo, 1971
Acropora bifurcata	40.7055	-14.3762	Nemenzo, 1971
Acropora bifurcata	49.0675	-12.1075	Nemenzo, 1971
Acropora bifurcata	48.0578	-13.3997	Nemenzo, 1971
Acropora bifurcata	48.2442	-13.4856	Nemenzo, 1971
Acropora bifurcata	48.2347	-13.1914	Nemenzo, 1971
Acropora bifurcata	48.1017	-13.5694	Nemenzo, 1971
Acropora bifurcata	49.0675	-12.1075	Nemenzo, 1971
Acropora bifurcata	48.0578	-13.3997	Nemenzo, 1971
Acropora bifurcata	48.2442	-13.4856	Nemenzo, 1971
Acropora bifurcata	48.2347	-13.1914	Nemenzo, 1971
Acropora bifurcata	48.1017	-13.5694	Nemenzo, 1971
Acropora branchi	39.73	-4.02	Riegl, 1995
Acropora branchi	40.5397	-12.9407	Riegl, 1995
Acropora branchi	71.5	-6.2	Riegl, 1995
Acropora branchi	40.92	-2.36	Riegl, 1995
Acropora branchi	40.6851	-11.015	Riegl, 1995
Acropora branchi	59.63	-16.61	Riegl, 1995
Acropora branchi	43.33	11.5	Riegl, 1995
Acropora branchi	49.07	-12.13	Riegl, 1995
Acropora branchi	49.72	-12.76	Riegl, 1995
Acropora branchi	40.7055	-14.3762	Riegl, 1995
Acropora bushyensis	39.73	-4.02	Veron & Wallace, 1984
Acropora bushyensis	40.5397	-12.9407	Veron & Wallace, 1984
Acropora bushyensis	71.5	-6.2	Veron & Wallace, 1984
Acropora bushyensis	40.92	-2.36	Veron & Wallace, 1984
Acropora bushyensis	40.6851	-11.015	Veron & Wallace, 1984
Acropora bushyensis	59.63	-16.61	Veron & Wallace, 1984
Acropora bushyensis	43.33	11.5	Veron & Wallace, 1984
Acropora bushyensis	49.07	-12.13	Veron & Wallace, 1984
Acropora bushyensis	49.72	-12.76	Veron & Wallace, 1984
Acropora bushyensis	40.7055	-14.3762	Veron & Wallace, 1984
Acropora bushyensis	152.15	-23.63	Veron & Wallace, 1984
Acropora bushyensis	150.08	-20.97	Veron & Wallace, 1984
Acropora bushyensis	152.08	-23.5	Veron & Wallace, 1984
Acropora bushyensis	151.92	-23.45	Veron & Wallace, 1984
Acropora bushyensis	151.95	-23.45	Veron & Wallace, 1984
Acropora bushyensis	166.5	-22.33	Veron & Wallace, 1984
Acropora bushyensis	113.17	-24.75	Veron & Wallace, 1984
Acropora bushyensis	132.17	-11.25	Veron & Wallace, 1984
Acropora bushyensis	150.083	-20.966	Veron & Wallace, 1984
Acropora cardenae	147.55	-18.467	Wells, 1985
Acropora carduus	150.87	-5.47	Dana, 1846
Acropora carduus	119.17	-4.8	(Dana, 1846)
Acropora carduus	119.7	-8.5	(Dana, 1846)
Acropora carduus	147.927	-19.052	(Dana, 1846)
Acropora carduus	145.497	-16.2923	(Dana, 1846)
Acropora carduus	145.506	-16.3048	(Dana, 1846)
Acropora carduus	148.443	-20.0072	(Dana, 1846)
Acropora carduus	145.4	-15.7138	(Dana, 1846)
Acropora carduus	145.843	-16.0732	(Dana, 1846)
Acropora carduus	145.468	-15.7387	(Dana, 1846)
Acropora carduus	146.292	-18.1492	(Dana, 1846)
Acropora carduus	146.283	-18.1485	(Dana, 1846)
Acropora carduus	148.609	-20.102	(Dana, 1846)
Acropora carduus	148.36	-19.9878	(Dana, 1846)
Acropora carduus	145.997	-16.7572	(Dana, 1846)
Acropora carduus	146.046	-16.5513	(Dana, 1846)
Acropora carduus	148.887	-20.1657	(Dana, 1846)
Acropora carduus	149.01	-20.1723	(Dana, 1846)
Acropora carduus	149.04	-20.2357	(Dana, 1846)
Acropora carduus	146.201	-17.092	(Dana, 1846)
Acropora carduus	146.388	-17.7095	(Dana, 1846)
Acropora carduus	146.072	-17.2117	(Dana, 1846)
Acropora carduus	145.841	-16.0863	(Dana, 1846)
Acropora carduus	145.948	-16.6373	(Dana, 1846)
Acropora carduus	146.008	-17.1518	(Dana, 1846)
Acropora carduus	146.578	-17.569	(Dana, 1846)
Acropora carduus	146.563	-17.5797	(Dana, 1846)
Acropora carduus	148.514	-20.0811	(Dana, 1846)
Acropora carduus	150.12	-5.3	(Dana, 1846)
Acropora carduus	144.03	-11.62	(Dana, 1846)
Acropora carduus	121.62	-0.43	(Dana, 1846)
Acropora carduus	124.8	1.77	(Dana, 1846)
Acropora carduus	122.33	-8.45	(Dana, 1846)
Acropora carduus	122.63	-0.42	(Dana, 1846)
Acropora carduus	118.4	2.08	(Dana, 1846)
Acropora carduus	150.1	-5.28	(Dana, 1846)
Acropora carduus	144	-11.7	(Dana, 1846)
Acropora carduus	146.73	-18.23	(Dana, 1846)
Acropora carduus	144.08	-9.92	(Dana, 1846)
Acropora carduus	119.22	-5.02	(Dana, 1846)
Acropora carduus	145.57	-16.38	(Dana, 1846)
Acropora carduus	146.7	-18.78	(Dana, 1846)
Acropora carduus	145.35	-14.77	(Dana, 1846)
Acropora carduus	146.48	-18.6	(Dana, 1846)
Acropora carduus	147.28	-9.53	(Dana, 1846)
Acropora carduus	146.5	-18.67	(Dana, 1846)
Acropora carduus	146.52	-18.68	(Dana, 1846)
Acropora carduus	146.53	-18.78	(Dana, 1846)
Acropora carduus	146.57	-18.67	(Dana, 1846)
Acropora carduus	150.1	-5.42	(Dana, 1846)
Acropora carduus	146.57	-18.72	(Dana, 1846)
Acropora carduus	125.23	1.48	(Dana, 1846)
Acropora carduus	-171.75	-13.83	(Dana, 1846)
Acropora carduus	119.286	-5.10472	(Dana, 1846)
Acropora carduus	144.031	-11.587	(Dana, 1846)
Acropora carduus	143.958	-13.246	(Dana, 1846)
Acropora carduus	144.031	-11.592	(Dana, 1846)
Acropora carduus	143.901	-13.069	(Dana, 1846)
Acropora carduus	144.028	-11.694	(Dana, 1846)
Acropora carduus	146.809	-18.199	(Dana, 1846)
Acropora carduus	145.462	-14.65	(Dana, 1846)
Acropora carduus	146.49	-18.56	(Dana, 1846)
Acropora carduus	144.023	-9.939	(Dana, 1846)
Acropora carduus	146.483	-18.6	(Dana, 1846)
Acropora carduus	146.503	-18.657	(Dana, 1846)
Acropora carduus	146.522	-18.774	(Dana, 1846)
Acropora carduus	146.59	-18.68	(Dana, 1846)
Acropora caroliniana	119.7	-8.5	Nemenzo, 1976
Acropora caroliniana	145.937	-16.6858	Nemenzo, 1976
Acropora caroliniana	145.43	-15.6352	Nemenzo, 1976
Acropora caroliniana	145.551	-16.5498	Nemenzo, 1976
Acropora caroliniana	149.04	-20.2357	Nemenzo, 1976
Acropora caroliniana	146.423	-17.7068	Nemenzo, 1976
Acropora caroliniana	145.841	-16.0863	Nemenzo, 1976
Acropora caroliniana	145.843	-16.0732	Nemenzo, 1976
Acropora caroliniana	146.568	-17.575	Nemenzo, 1976
Acropora caroliniana	145.257	-14.6505	Nemenzo, 1976
Acropora caroliniana	146.563	-17.5797	Nemenzo, 1976
Acropora caroliniana	146.009	-17.1652	Nemenzo, 1976
Acropora caroliniana	146.189	-17.0567	Nemenzo, 1976
Acropora caroliniana	122.07	-0.47	Nemenzo, 1976
Acropora caroliniana	121.62	-0.43	Nemenzo, 1976
Acropora caroliniana	122.33	-8.45	Nemenzo, 1976
Acropora caroliniana	118.4	2.08	Nemenzo, 1976
Acropora caroliniana	118.27	2.27	Nemenzo, 1976
Acropora caroliniana	124.98	1.75	Nemenzo, 1976
Acropora caroliniana	152.15	-23.63	Nemenzo, 1976
Acropora caroliniana	150.08	-20.97	Nemenzo, 1976
Acropora caroliniana	146.73	-18.23	Nemenzo, 1976
Acropora caroliniana	122.08	-0.43	Nemenzo, 1976
Acropora caroliniana	121.82	-0.33	Nemenzo, 1976
Acropora caroliniana	120.12	11.57	Nemenzo, 1976
Acropora caroliniana	118.78	4.63	Nemenzo, 1976
Acropora caroliniana	147.28	-9.53	Nemenzo, 1976
Acropora caroliniana	118.72	4.58	Nemenzo, 1976
Acropora caroliniana	122.23	-0.2	Nemenzo, 1976
Acropora caroliniana	150.1	-5.42	Nemenzo, 1976
Acropora caroliniana	143.958	-13.246	Nemenzo, 1976
Acropora caroliniana	152.168	-23.619	Nemenzo, 1976
Acropora caroliniana	150.087	-20.951	Nemenzo, 1976
Acropora caroliniana	146.638	-18.232	Nemenzo, 1976
Acropora cerealis	143.87	-12.1	Dana, 1846
Acropora cerealis	127.39	0.78	Dana, 1846
Acropora cerealis	34.1	26.5
Acropora cerealis	114.5	15.85	Brook, 1892
Acropora cerealis	166.446	-22.3167	(Brook, 1893)
Acropora cerealis	162.183	11.6686	(Dana)
Acropora cerealis	143.958	-13.246	(Dana)
Acropora cerealis	144.031	-11.592	(Dana)
Acropora cerealis	144.028	-11.694	(Dana)
Acropora cerealis	143.983	-10.766	(Dana)
Acropora cerealis	152.155	-23.635	(Dana)
Acropora cerealis	152.424	-23.886	(Dana)
Acropora cerealis	152.389	-23.905	(Dana)
Acropora cerealis	146.638	-18.232	(Dana)
Acropora cerealis	145.194	-14.732	(Dana)
Acropora cerealis	143.626	-13.043	(Dana)
Acropora cerealis	144.974	-14.492	(Dana)
Acropora cerealis	119.17	-4.8	(Dana, 1846)
Acropora cerealis	120.5	-6.3	(Dana, 1846)
Acropora cerealis	104.155	2.825	(Dana, 1846)
Acropora cerealis	145.548	-15.726	(Dana, 1846)
Acropora cerealis	145.97	-16.6073	(Dana, 1846)
Acropora cerealis	146.074	-17.2083	(Dana, 1846)
Acropora cerealis	146.006	-17.1593	(Dana, 1846)
Acropora cerealis	145.843	-16.0732	(Dana, 1846)
Acropora cerealis	145.672	-16.214	(Dana, 1846)
Acropora cerealis	145.637	-16.1143	(Dana, 1846)
Acropora cerealis	145.567	-15.7833	(Dana, 1846)
Acropora cerealis	145.848	-16.4063	(Dana, 1846)
Acropora cerealis	145.417	-15.1333	(Dana, 1846)
Acropora cerealis	146.201	-17.092	(Dana, 1846)
Acropora cerealis	146.385	-17.7137	(Dana, 1846)
Acropora cerealis	146.09	-17.2265	(Dana, 1846)
Acropora cerealis	146.015	-17.1537	(Dana, 1846)
Acropora cerealis	146.008	-17.1518	(Dana, 1846)
Acropora cerealis	145.643	-16.1188	(Dana, 1846)
Acropora cerealis	145.801	-16.394	(Dana, 1846)
Acropora cerealis	145.66	-16.2623	(Dana, 1846)
Acropora cerealis	145.672	-16.2715	(Dana, 1846)
Acropora cerealis	145.431	-15.6382	(Dana, 1846)
Acropora cerealis	145.937	-16.6858	(Dana, 1846)
Acropora cerealis	146.095	-17.2253	(Dana, 1846)
Acropora cerealis	146.079	-17.2035	(Dana, 1846)
Acropora cerealis	149.279	-20.7995	(Dana, 1846)
Acropora cerealis	145.721	-15.6587	(Dana, 1846)
Acropora cerealis	145.762	-16.1272	(Dana, 1846)
Acropora cerealis	145.695	-16.375	(Dana, 1846)
Acropora cerealis	145.843	-16.406	(Dana, 1846)
Acropora cerealis	145.545	-15.7263	(Dana, 1846)
Acropora cerealis	145.433	-15.6415	(Dana, 1846)
Acropora cerealis	145.462	-15.7433	(Dana, 1846)
Acropora cerealis	145.939	-16.6698	(Dana, 1846)
Acropora cerealis	145.948	-16.6373	(Dana, 1846)
Acropora cerealis	145.975	-16.6122	(Dana, 1846)
Acropora cerealis	145.997	-16.7572	(Dana, 1846)
Acropora cerealis	145.558	-16.3863	(Dana, 1846)
Acropora cerealis	145.327	-15.1402	(Dana, 1846)
Acropora cerealis	148.653	-20.1107	(Dana, 1846)
Acropora cerealis	145.506	-16.3048	(Dana, 1846)
Acropora cerealis	148.443	-20.0072	(Dana, 1846)
Acropora cerealis	148.887	-20.1657	(Dana, 1846)
Acropora cerealis	145.267	-15.1667	(Dana, 1846)
Acropora cerealis	148.934	-20.338	(Dana, 1846)
Acropora cerealis	148.571	-20.0957	(Dana, 1846)
Acropora cerealis	148.514	-20.0813	(Dana, 1846)
Acropora cerealis	145.551	-16.5498	(Dana, 1846)
Acropora cerealis	148.995	-20.2178	(Dana, 1846)
Acropora cerealis	148.975	-20.1755	(Dana, 1846)
Acropora cerealis	145.4	-15.7138	(Dana, 1846)
Acropora cerealis	146.388	-17.7095	(Dana, 1846)
Acropora cerealis	146.167	-17.6742	(Dana, 1846)
Acropora cerealis	146.009	-17.1652	(Dana, 1846)
Acropora cerealis	149.035	-20.157	(Dana, 1846)
Acropora cerealis	149.025	-20.1672	(Dana, 1846)
Acropora cerealis	149.01	-20.1723	(Dana, 1846)
Acropora cerealis	149.055	-20.3083	(Dana, 1846)
Acropora cerealis	149.032	-20.3065	(Dana, 1846)
Acropora cerealis	149.019	-20.2402	(Dana, 1846)
Acropora cerealis	148.36	-19.9878	(Dana, 1846)
Acropora cerealis	148.47	-19.9943	(Dana, 1846)
Acropora cerealis	145.643	-16.1093	(Dana, 1846)
Acropora cerealis	145.66	-16.2878	(Dana, 1846)
Acropora cerealis	145.833	-16.4	(Dana, 1846)
Acropora cerealis	145.656	-16.2838	(Dana, 1846)
Acropora cerealis	145.689	-16.4422	(Dana, 1846)
Acropora cerealis	145.554	-15.7845	(Dana, 1846)
Acropora cerealis	145.417	-15.4833	(Dana, 1846)
Acropora cerealis	146.283	-18.1485	(Dana, 1846)
Acropora cerealis	145.331	-15.5052	(Dana, 1846)
Acropora cerealis	148.488	-20.0773	(Dana, 1846)
Acropora cerealis	146.578	-17.569	(Dana, 1846)
Acropora cerealis	149.268	-20.7968	(Dana, 1846)
Acropora cerealis	145.45	-15.6498	(Dana, 1846)
Acropora cerealis	145.47	-15.736	(Dana, 1846)
Acropora cerealis	145.997	-16.7663	(Dana, 1846)
Acropora cerealis	145.945	-16.6517	(Dana, 1846)
Acropora cerealis	145.772	-16.118	(Dana, 1846)
Acropora cerealis	148.628	-20.0212	(Dana, 1846)
Acropora cerealis	145.446	-15.643	(Dana, 1846)
Acropora cerealis	145.468	-15.7387	(Dana, 1846)
Acropora cerealis	148.554	-19.9957	(Dana, 1846)
Acropora cerealis	146.046	-16.5513	(Dana, 1846)
Acropora cerealis	145.372	-14.6942	(Dana, 1846)
Acropora cerealis	145.844	-16.0755	(Dana, 1846)
Acropora cerealis	145.774	-16.3768	(Dana, 1846)
Acropora cerealis	145.731	-15.6532	(Dana, 1846)
Acropora cerealis	145.43	-15.6352	(Dana, 1846)
Acropora cerealis	145.401	-15.716	(Dana, 1846)
Acropora cerealis	145.687	-16.1763	(Dana, 1846)
Acropora cerealis	148.508	-20.0782	(Dana, 1846)
Acropora cerealis	149.106	-20.266	(Dana, 1846)
Acropora cerealis	149.043	-20.3083	(Dana, 1846)
Acropora cerealis	146.196	-17.0607	(Dana, 1846)
Acropora cerealis	146.563	-17.5797	(Dana, 1846)
Acropora cerealis	145.393	-14.7053	(Dana, 1846)
Acropora cerealis	145.841	-16.0863	(Dana, 1846)
Acropora cerealis	145.257	-14.6505	(Dana, 1846)
Acropora cerealis	146.189	-17.0567	(Dana, 1846)
Acropora cerealis	145.496	-16.2997	(Dana, 1846)
Acropora cerealis	145.507	-16.3018	(Dana, 1846)
Acropora cerealis	146.077	-17.2041	(Dana, 1846)
Acropora cerealis	146.007	-17.1621	(Dana, 1846)
Acropora cerealis	149.424	-20.9259	(Dana, 1846)
Acropora cerealis	146.092	-17.2195	(Dana, 1846)
Acropora cerealis	39.73	-4.02	(Dana, 1846)
Acropora cerealis	40.5397	-12.9407	(Dana, 1846)
Acropora cerealis	71.5	-6.2	(Dana, 1846)
Acropora cerealis	40.92	-2.36	(Dana, 1846)
Acropora cerealis	40.6851	-11.015	(Dana, 1846)
Acropora cerealis	59.63	-16.61	(Dana, 1846)
Acropora cerealis	43.33	11.5	(Dana, 1846)
Acropora cerealis	49.07	-12.13	(Dana, 1846)
Acropora cerealis	49.72	-12.76	(Dana, 1846)
Acropora cerealis	40.7055	-14.3762	(Dana, 1846)
Acropora cerealis	122.93	-0.47	(Dana, 1846)
Acropora cerealis	144.03	-11.62	(Dana, 1846)
Acropora cerealis	147.28	-9.57	(Dana, 1846)
Acropora cerealis	100.23	-0.93	(Dana, 1846)
Acropora cerealis	43.42	12.67	(Dana, 1846)
Acropora cerealis	122.07	-0.47	(Dana, 1846)
Acropora cerealis	121.62	-0.43	(Dana, 1846)
Acropora cerealis	122.35	-8.48	(Dana, 1846)
Acropora cerealis	124.78	1.57	(Dana, 1846)
Acropora cerealis	143.9	-13.07	(Dana, 1846)
Acropora cerealis	150.82	-17.43	(Dana, 1846)
Acropora cerealis	158.67	-19.33	(Dana, 1846)
Acropora cerealis	152.08	-17.13	(Dana, 1846)
Acropora cerealis	158.25	7	(Dana, 1846)
Acropora cerealis	153.5	-27	(Dana, 1846)
Acropora cerealis	122.4	-8.5	(Dana, 1846)
Acropora cerealis	128.33	-3.32	(Dana, 1846)
Acropora cerealis	118.4	2.1	(Dana, 1846)
Acropora cerealis	124.8	1.77	(Dana, 1846)
Acropora cerealis	122.33	-8.45	(Dana, 1846)
Acropora cerealis	127.42	26.2	(Dana, 1846)
Acropora cerealis	122.63	-0.42	(Dana, 1846)
Acropora cerealis	171.7	7.08	(Dana, 1846)
Acropora cerealis	118.4	2.08	(Dana, 1846)
Acropora cerealis	150.1	-5.28	(Dana, 1846)
Acropora cerealis	158.42	-19.83	(Dana, 1846)
Acropora cerealis	147.28	-9.55	(Dana, 1846)
Acropora cerealis	-166.29	23.85	(Dana, 1846)
Acropora cerealis	147.65	-18.83	(Dana, 1846)
Acropora cerealis	144	-11.7	(Dana, 1846)
Acropora cerealis	118.23	2.33	(Dana, 1846)
Acropora cerealis	118.27	2.27	(Dana, 1846)
Acropora cerealis	118.25	2.3	(Dana, 1846)
Acropora cerealis	124.98	1.75	(Dana, 1846)
Acropora cerealis	120.95	13.52	(Dana, 1846)
Acropora cerealis	152.15	-23.63	(Dana, 1846)
Acropora cerealis	150.08	-20.97	(Dana, 1846)
Acropora cerealis	-166.27	23.84	(Dana, 1846)
Acropora cerealis	152.4	-23.9	(Dana, 1846)
Acropora cerealis	146.73	-18.23	(Dana, 1846)
Acropora cerealis	-166.17	23.75	(Dana, 1846)
Acropora cerealis	113.79	-28.635	(Dana, 1846)
Acropora cerealis	148.17	-19.22	(Dana, 1846)
Acropora cerealis	166.5	-22.33	(Dana, 1846)
Acropora cerealis	119.22	-5.02	(Dana, 1846)
Acropora cerealis	145.45	-14.67	(Dana, 1846)
Acropora cerealis	145.47	-14.68	(Dana, 1846)
Acropora cerealis	146.5	-18.57	(Dana, 1846)
Acropora cerealis	119.28	-5.1	(Dana, 1846)
Acropora cerealis	146.7	-18.78	(Dana, 1846)
Acropora cerealis	-170.583	25.417	(Dana, 1846)
Acropora cerealis	121.82	-0.33	(Dana, 1846)
Acropora cerealis	119.73	-0.65	(Dana, 1846)
Acropora cerealis	145.2	-14.72	(Dana, 1846)
Acropora cerealis	113.75	-23.12	(Dana, 1846)
Acropora cerealis	143.62	-13.03	(Dana, 1846)
Acropora cerealis	146.43	-18.82	(Dana, 1846)
Acropora cerealis	146.48	-18.6	(Dana, 1846)
Acropora cerealis	143.6	-12.8	(Dana, 1846)
Acropora cerealis	103.75	1.22	(Dana, 1846)
Acropora cerealis	149.5	-21.47	(Dana, 1846)
Acropora cerealis	103.73	1.23	(Dana, 1846)
Acropora cerealis	113.77	-22.88	(Dana, 1846)
Acropora cerealis	106.53	-5.58	(Dana, 1846)
Acropora cerealis	55.75	-4.3	(Dana, 1846)
Acropora cerealis	147.28	-9.53	(Dana, 1846)
Acropora cerealis	116.02	5.95	(Dana, 1846)
Acropora cerealis	116.63	-20.53	(Dana, 1846)
Acropora cerealis	122.23	-0.2	(Dana, 1846)
Acropora cerealis	146.53	-18.78	(Dana, 1846)
Acropora cerealis	146.57	-18.67	(Dana, 1846)
Acropora cerealis	150.12	-5.47	(Dana, 1846)
Acropora cerealis	119.75	-0.67	(Dana, 1846)
Acropora cerealis	150.1	-5.42	(Dana, 1846)
Acropora cerealis	149.02	-20.18	(Dana, 1846)
Acropora cerealis	146.57	-18.72	(Dana, 1846)
Acropora cerealis	55.38	-4.63	(Dana, 1846)
Acropora cerealis	125.23	1.47	(Dana, 1846)
Acropora cerealis	122.17	-8.53	(Dana, 1846)
Acropora cerealis	100.35	-1.12	(Dana, 1846)
Acropora cerealis	-171.97	-13.93	(Dana, 1846)
Acropora cerealis	125.23	1.48	(Dana, 1846)
Acropora cerealis	124.35	-8.22	(Dana, 1846)
Acropora cerealis	124.38	-8.22	(Dana, 1846)
Acropora cerealis	-171.75	-13.83	(Dana, 1846)
Acropora cerealis	124.37	-8.28	(Dana, 1846)
Acropora cerealis	147	-7	(Dana, 1846)
Acropora cerealis	124.32	-8.3	(Dana, 1846)
Acropora cerealis	47.8392	-13.6183	(Dana, 1846)
Acropora cerealis	47.9533	-13.5069	(Dana, 1846)
Acropora cerealis	48.5525	-13.0383	(Dana, 1846)
Acropora cerealis	49.0617	-12.1275	(Dana, 1846)
Acropora cerealis	48.9575	-12.2661	(Dana, 1846)
Acropora cerealis	48.9894	-12.2397	(Dana, 1846)
Acropora cerealis	48.9733	-12.2572	(Dana, 1846)
Acropora cerealis	48.6175	-12.8264	(Dana, 1846)
Acropora cerealis	48.5953	-12.8269	(Dana, 1846)
Acropora cerealis	48.5411	-12.9358	(Dana, 1846)
Acropora cerealis	48.5775	-12.855	(Dana, 1846)
Acropora cerealis	47.9956	-13.555	(Dana, 1846)
Acropora cerealis	48.1617	-13.3228	(Dana, 1846)
Acropora cerealis	47.8392	-13.6183	(Dana, 1846)
Acropora cerealis	47.9533	-13.5069	(Dana, 1846)
Acropora cerealis	48.5525	-13.0383	(Dana, 1846)
Acropora cerealis	49.0617	-12.1275	(Dana, 1846)
Acropora cerealis	48.9575	-12.2661	(Dana, 1846)
Acropora cerealis	48.9894	-12.2397	(Dana, 1846)
Acropora cerealis	48.9733	-12.2572	(Dana, 1846)
Acropora cerealis	48.6175	-12.8264	(Dana, 1846)
Acropora cerealis	48.5953	-12.8269	(Dana, 1846)
Acropora cerealis	48.5411	-12.9358	(Dana, 1846)
Acropora cerealis	48.5775	-12.855	(Dana, 1846)
Acropora cerealis	47.9956	-13.555	(Dana, 1846)
Acropora cerealis	48.1617	-13.3228	(Dana, 1846)
Acropora cerealis	119.344	-5.12361	(Dana, 1846)
Acropora cerealis	119.286	-5.10472	(Dana, 1846)
Acropora cerealis	119.096	-5.03167	(Dana, 1846)
Acropora cerealis	119.264	-5.08611	(Dana, 1846)
Acropora cervicornis	142.22	-10.57	Lamarck, 1816
Acropora cervicornis	-77.8791	24.8775	(Lamarck, 1816)
Acropora cervicornis	-77.6707	24.3431	(Lamarck, 1816)
Acropora cervicornis	-87.3308	18.767	(Lamarck, 1816)
Acropora cervicornis	-77.6932	24.6259	(Lamarck, 1816)
Acropora cervicornis	-77.861	24.8449	(Lamarck, 1816)
Acropora cervicornis	-81.4669	21.9605	(Lamarck, 1816)
Acropora cervicornis	-87.4266	18.458	(Lamarck, 1816)
Acropora cervicornis	-79.1453	22.6533	(Lamarck, 1816)
Acropora cervicornis	-78.9454	9.55455	(Lamarck, 1816)
Acropora cervicornis	-78.3497	22.5403	(Lamarck, 1816)
Acropora cervicornis	-78.5905	9.47465	(Lamarck, 1816)
Acropora cervicornis	-80.1491	25.485	(Lamarck, 1816)
Acropora cervicornis	-80.1646	25.3889	(Lamarck, 1816)
Acropora cervicornis	-82.0659	9.27277	(Lamarck, 1816)
Acropora cervicornis	-65.5725	18.3777	(Lamarck, 1816)
Acropora cervicornis	-82.9203	24.6359	(Lamarck, 1816)
Acropora cervicornis	-82.9223	24.6353	(Lamarck, 1816)
Acropora cervicornis	-66.7438	11.9301	(Lamarck, 1816)
Acropora cervicornis	-80.3699	25.0449	(Lamarck, 1816)
Acropora cervicornis	-65.2484	18.3311	(Lamarck, 1816)
Acropora cervicornis	-88.14	16.76	(Lamarck, 1816)
Acropora cervicornis	-82.9744	12.2984	(Lamarck, 1816)
Acropora cervicornis	-82.8095	24.6687	(Lamarck, 1816)
Acropora cervicornis	-81.8752	24.4529	(Lamarck, 1816)
Acropora cervicornis	-80.0905	26.1625	(Lamarck, 1816)
Acropora cervicornis	-80.089	26.1783	(Lamarck, 1816)
Acropora cervicornis	-78.7723	9.5947	(Lamarck, 1816)
Acropora cervicornis	-80.4136	25.0133	(Lamarck, 1816)
Acropora cervicornis	-71.1105	21.4384	(Lamarck, 1816)
Acropora cervicornis	-77.6981	24.4395	(Lamarck, 1816)
Acropora cervicornis	-81.7146	24.48	(Lamarck, 1816)
Acropora cervicornis	-65.2285	18.2991	(Lamarck, 1816)
Acropora cervicornis	-65.2648	18.3384	(Lamarck, 1816)
Acropora cervicornis	-65.5698	18.3739	(Lamarck, 1816)
Acropora cervicornis	-78.8732	9.57602	(Lamarck, 1816)
Acropora cervicornis	-88.19	16.66	(Lamarck, 1816)
Acropora cervicornis	-65.3354	18.3125	(Lamarck, 1816)
Acropora cervicornis	-82.9804	12.3157	(Lamarck, 1816)
Acropora cervicornis	-81.4052	24.5461	(Lamarck, 1816)
Acropora cervicornis	-80.7543	24.766	(Lamarck, 1816)
Acropora cervicornis	-80.8599	24.7236	(Lamarck, 1816)
Acropora cervicornis	-78.9032	9.54065	(Lamarck, 1816)
Acropora cervicornis	-66.723	11.8811	(Lamarck, 1816)
Acropora cervicornis	-88.17	16.71	(Lamarck, 1816)
Acropora cervicornis	-76.6051	18.234	(Lamarck, 1816)
Acropora cervicornis	-81.8874	24.4757	(Lamarck, 1816)
Acropora cervicornis	-83.0344	12.1839	(Lamarck, 1816)
Acropora cervicornis	-82.8735	24.6658	(Lamarck, 1816)
Acropora cervicornis	-82.8871	24.6681	(Lamarck, 1816)
Acropora cervicornis	-77.9217	18.5058	(Lamarck, 1816)
Acropora cervicornis	-81.3931	24.5646	(Lamarck, 1816)
Acropora cervicornis	-66.689	11.8822	(Lamarck, 1816)
Acropora cervicornis	-78.8822	9.55953	(Lamarck, 1816)
Acropora cervicornis	-78.7792	9.596	(Lamarck, 1816)
Acropora cervicornis	-77.8795	18.524	(Lamarck, 1816)
Acropora cervicornis	-77.857	18.5261	(Lamarck, 1816)
Acropora cervicornis	-88.16	16.77	(Lamarck, 1816)
Acropora cervicornis	-87.4631	20.0975	(Lamarck, 1816)
Acropora cervicornis	-65.533	18.3421	(Lamarck, 1816)
Acropora cervicornis	-78.9444	9.55365	(Lamarck, 1816)
Acropora cervicornis	-81.5596	24.5139	(Lamarck, 1816)
Acropora cervicornis	-65.5704	18.3547	(Lamarck, 1816)
Acropora cervicornis	-88.0286	17.3521	(Lamarck, 1816)
Acropora cervicornis	-78.6761	9.57528	(Lamarck, 1816)
Acropora cervicornis	-82.9056	24.6889	(Lamarck, 1816)
Acropora cervicornis	-87.9537	17.3553	(Lamarck, 1816)
Acropora cervicornis	-65.236	18.2929	(Lamarck, 1816)
Acropora cervicornis	-87.4433	19.8333	(Lamarck, 1816)
Acropora cervicornis	-79.145	22.6547	(Lamarck, 1816)
Acropora cervicornis	-81.5176	22.0959	(Lamarck, 1816)
Acropora cervicornis	-78.4444	22.5636	(Lamarck, 1816)
Acropora cervicornis	-88.0433	17.276	(Lamarck, 1816)
Acropora cervicornis	-81.5132	22.1588	(Lamarck, 1816)
Acropora cervicornis	-77.7786	24.7452	(Lamarck, 1816)
Acropora cervicornis	-87.8228	17.5484	(Lamarck, 1816)
Acropora cervicornis	-96.0683	19.1972	(Lamarck, 1816)
Acropora cervicornis	-83.0684	12.1863	(Lamarck, 1816)
Acropora cervicornis	-87.4594	20.1058	(Lamarck, 1816)
Acropora cervicornis	-81.5467	22.1015	(Lamarck, 1816)
Acropora cervicornis	-72.187	21.814	(Lamarck, 1816)
Acropora cervicornis	-72.1835	21.818	(Lamarck, 1816)
Acropora cervicornis	-88.078	16.813	(Lamarck, 1816)
Acropora cervicornis	-81.4836	22.109	(Lamarck, 1816)
Acropora cervicornis	-81.4756	21.9879	(Lamarck, 1816)
Acropora cervicornis	-87.4478	19.825	(Lamarck, 1816)
Acropora cervicornis	-77.697	24.5064	(Lamarck, 1816)
Acropora cervicornis	-83.0822	12.177	(Lamarck, 1816)
Acropora cervicornis	-81.5104	22.0209	(Lamarck, 1816)
Acropora cervicornis	-83.0335	12.0301	(Lamarck, 1816)
Acropora cervicornis	-79.3631	22.7203	(Lamarck, 1816)
Acropora cervicornis	-72.2257	21.8086	(Lamarck, 1816)
Acropora cervicornis	-88.3442	22.3023	(Lamarck, 1816)
Acropora cervicornis	-97.6327	22.3361	(Lamarck, 1816)
Acropora cervicornis	-94.0212	18.3953	(Lamarck, 1816)
Acropora cervicornis	-82.3407	24.7806	(Lamarck, 1816)
Acropora cervicornis	-94.1318	18.2111	(Lamarck, 1816)
Acropora cervicornis	-97.7937	22.28	(Lamarck, 1816)
Acropora cervicornis	-63.5	17.41	(Lamarck, 1816)
Acropora cervicornis	-80.12	25.38	(Lamarck, 1816)
Acropora cervicornis	-78.67	9.58	(Lamarck, 1816)
Acropora cervicornis	-76.13	23.78	(Lamarck, 1816)
Acropora cervicornis	-80.25	25.17	(Lamarck, 1816)
Acropora cervicornis	-76.1	23.77	(Lamarck, 1816)
Acropora cervicornis	-82.92	24.63	(Lamarck, 1816)
Acropora cervicornis	-64.77	10.28	(Lamarck, 1816)
Acropora cervicornis	-67.0769	17.9441	(Lamarck, 1816)
Acropora cervicornis	-67.0767	17.945	(Lamarck, 1816)
Acropora cervicornis	-67.0863	17.9363	(Lamarck, 1816)
Acropora cervicornis	-67.0494	17.9392	(Lamarck, 1816)
Acropora cervicornis	-67.0014	17.946	(Lamarck, 1816)
Acropora cervicornis	-67.0431	17.9551	(Lamarck, 1816)
Acropora cervicornis	-67.0581	17.942	(Lamarck, 1816)
Acropora cervicornis	-67.0505	17.9403	(Lamarck, 1816)
Acropora cervicornis	-67.0801	17.944	(Lamarck, 1816)
Acropora cervicornis	-67.0411	17.9418	(Lamarck, 1816)
Acropora cervicornis	-67.0789	17.9412	(Lamarck, 1816)
Acropora cervicornis	-67.0999	17.933	(Lamarck, 1816)
Acropora cervicornis	-67.0986	17.9319	(Lamarck, 1816)
Acropora cervicornis	-67.0849	17.9422	(Lamarck, 1816)
Acropora cervicornis	-67.0988	17.9302	(Lamarck, 1816)
Acropora cervicornis	-67.0561	17.9343	(Lamarck, 1816)
Acropora cervicornis	-67.0807	17.9413	(Lamarck, 1816)
Acropora cervicornis	-67.0811	17.9404	(Lamarck, 1816)
Acropora cervicornis	-67.0803	17.9286	(Lamarck, 1816)
Acropora cervicornis	-67.0998	17.9291	(Lamarck, 1816)
Acropora cervicornis	-67.0805	17.9298	(Lamarck, 1816)
Acropora cervicornis	-67.0889	17.9265	(Lamarck, 1816)
Acropora cervicornis	-75.7852	10.1643	(Lamarck, 1816)
Acropora cervicornis	-74.2242	11.2511	(Lamarck, 1816)
Acropora cervicornis	-74.2201	11.2499	(Lamarck, 1816)
Acropora cervicornis	-75.7352	10.1558	(Lamarck, 1816)
Acropora cervicornis	-74.1319	11.328	(Lamarck, 1816)
Acropora cervicornis	-68.8292	11.4411	(Lamarck, 1816)
Acropora cervicornis	-82.875	14.4217	(Lamarck, 1816)
Acropora cervicornis	-65.0027	18.3085	(Lamarck, 1816)
Acropora cervicornis	-65.018	18.362	(Lamarck, 1816)
Acropora cervicornis	-65.0039	18.3672	(Lamarck, 1816)
Acropora cervicornis	-65.0863	18.2592	(Lamarck, 1816)
Acropora cervicornis	-81.5773	24.5217	(Lamarck, 1816)
Acropora cervicornis	-81.5204	24.523	(Lamarck, 1816)
Acropora cervicornis	-81.5198	24.5226	(Lamarck, 1816)
Acropora cervicornis	-81.0662	24.6397	(Lamarck, 1816)
Acropora cervicornis	-81.0664	24.6396	(Lamarck, 1816)
Acropora cervicornis	-81.0669	24.6402	(Lamarck, 1816)
Acropora cervicornis	-81.0766	24.6643	(Lamarck, 1816)
Acropora cervicornis	-80.7349	24.7789	(Lamarck, 1816)
Acropora cervicornis	-80.7364	24.7772	(Lamarck, 1816)
Acropora cervicornis	-80.7359	24.7787	(Lamarck, 1816)
Acropora cervicornis	-80.7365	24.7763	(Lamarck, 1816)
Acropora cervicornis	-80.7362	24.7771	(Lamarck, 1816)
Acropora cervicornis	-80.9581	24.6977	(Lamarck, 1816)
Acropora cervicornis	-80.9581	24.6977	(Lamarck, 1816)
Acropora cervicornis	-80.9581	24.6977	(Lamarck, 1816)
Acropora cervicornis	-80.9585	24.6976	(Lamarck, 1816)
Acropora cervicornis	-81.3303	24.5694	(Lamarck, 1816)
Acropora cervicornis	-81.3315	24.573	(Lamarck, 1816)
Acropora cervicornis	-81.4983	24.5275	(Lamarck, 1816)
Acropora cervicornis	-81.4989	24.5273	(Lamarck, 1816)
Acropora cervicornis	-81.4376	24.5532	(Lamarck, 1816)
Acropora cervicornis	-81.3817	24.5693	(Lamarck, 1816)
Acropora cervicornis	-81.4132	24.5595	(Lamarck, 1816)
Acropora cervicornis	-81.4136	24.5591	(Lamarck, 1816)
Acropora cervicornis	-81.4134	24.5591	(Lamarck, 1816)
Acropora cervicornis	-81.4129	24.559	(Lamarck, 1816)
Acropora cervicornis	-81.533	24.5487	(Lamarck, 1816)
Acropora cervicornis	-81.5331	24.5485	(Lamarck, 1816)
Acropora cervicornis	-81.5332	24.5483	(Lamarck, 1816)
Acropora cervicornis	-81.5014	24.5608	(Lamarck, 1816)
Acropora cervicornis	-81.5013	24.5602	(Lamarck, 1816)
Acropora cervicornis	-81.433	24.5835	(Lamarck, 1816)
Acropora cervicornis	-81.3336	24.5683	(Lamarck, 1816)
Acropora cervicornis	-81.401	24.5631	(Lamarck, 1816)
Acropora cervicornis	-81.3265	24.5686	(Lamarck, 1816)
Acropora cervicornis	-81.5768	24.5217	(Lamarck, 1816)
Acropora cervicornis	-81.457	24.5477	(Lamarck, 1816)
Acropora cervicornis	-81.4079	24.5615	(Lamarck, 1816)
Acropora cervicornis	-81.4006	24.5631	(Lamarck, 1816)
Acropora cervicornis	-81.5014	24.5604	(Lamarck, 1816)
Acropora cervicornis	-81.3716	24.5959	(Lamarck, 1816)
Acropora cervicornis	-81.3315	24.5727	(Lamarck, 1816)
Acropora cervicornis	-81.5769	24.5215	(Lamarck, 1816)
Acropora cervicornis	-81.5357	24.5233	(Lamarck, 1816)
Acropora cervicornis	-81.4436	24.5387	(Lamarck, 1816)
Acropora cervicornis	-64.6781	18.3329	(Lamarck, 1816)
Acropora cervicornis	-64.7442	18.3202	(Lamarck, 1816)
Acropora cervicornis	-64.6798	18.3508	(Lamarck, 1816)
Acropora cervicornis	-64.7746	18.3606	(Lamarck, 1816)
Acropora cervicornis	-64.7511	18.3681	(Lamarck, 1816)
Acropora cervicornis	-64.6868	18.3583	(Lamarck, 1816)
Acropora cervicornis	-64.7058	18.3039	(Lamarck, 1816)
Acropora cervicornis	-64.6694	18.3503	(Lamarck, 1816)
[truncated: 46,579 more rows]

## Sheet: LIG occurrences
Species	Longitude	Latitude	Reference
Acanthastrea echinata	39.5833	-4.28333	J. A. Crame. 1981. Ecological stratification in the Pleistocene coral reefs of the Kenya coast. Palaeontology 24(3):609-646
Acanthastrea echinata	40.1333	-3.25	J. A. Crame. 1980. Succession and diversity in the Pleistocene coral reefs of the Kenya Coast. Palaeontology 23(1):1-37
Acanthastrea echinata	39.4667	15.6167	E. Montanaro Gallitelli. 1973. Ricerche eseguite negli anni 1941-1942 sopra i Coralli delle scogliere emerse di Massaua e Gibuti [Research done between 1941 and 1942 on emersed coral reefs of Massawa and Djibouti]. Missione Geologica dell'Azienda Generale Italiana Petroli (AGIP) nella Dancalia Meridionale e sugli Altipiani Hararini (1936-1938) 4(2):446-519
Acanthastrea echinata	35.4667	27.6833	W-C. Dullo. 1990. Facies, Fossil Record, and Age of Pleistocene Reefs from the Red Sea (Saudi Arabia). Facies 22:1-46
Acanthastrea echinata	34.2253	27.7886	H. Mewis. 2011. Field work Sinai.
Acropora abrotanoides	57.5	-20.3333	L. F. Montaggioni. 1982. Pleistocene marine depositional environments from Mauritius island, Indian Ocean. Geobios 15(2):161-179
Acropora aspera	115.517	-32	B. J. Greenstein and J. M. Pandolfi. 2008. Escaping the heat: range shifts of reef coral taxa in coastal Western Australia. Global Change Biology 14:513-528
Acropora aspera	113.383	-24.2167	B. J. Greenstein and J. M. Pandolfi. 2008. Escaping the heat: range shifts of reef coral taxa in coastal Western Australia. Global Change Biology 14:513-528
Acropora aspera	113.433	-24.0333	B. J. Greenstein and J. M. Pandolfi. 2008. Escaping the heat: range shifts of reef coral taxa in coastal Western Australia. Global Change Biology 14:513-528
Acropora aspera	113.833	-22.2167	B. J. Greenstein and J. M. Pandolfi. 2008. Escaping the heat: range shifts of reef coral taxa in coastal Western Australia. Global Change Biology 14:513-528
Acropora aspera	114.117	-21.8	B. J. Greenstein and J. M. Pandolfi. 2008. Escaping the heat: range shifts of reef coral taxa in coastal Western Australia. Global Change Biology 14:513-528
Acropora cervicornis	-64.6167	11.85	C. Schubert. 1997. Pleistocene marine terraces of la Blanquilla island, Venezuela, and their diagenesis. Proceedings, Third International Coral Reef Symposium 2:149-154
Acropora cervicornis	-68.9833	12.1333	J. M. Pandolfi. 2001. Community structure of Pleistocene coral reefs of Curacao, Netherlands Antilles. Ecological Monographs 71(1):49-67
Acropora cervicornis	-68.8833	12.1667	J. M. Pandolfi. 2001. Community structure of Pleistocene coral reefs of Curacao, Netherlands Antilles. Ecological Monographs 71(1):49-67
Acropora cervicornis	-69.0833	12.2	J. M. Pandolfi. 2001. Community structure of Pleistocene coral reefs of Curacao, Netherlands Antilles. Ecological Monographs 71(1):49-67
Acropora cervicornis	-69.0667	12.2833	J. M. Pandolfi, G. Llewellyn, and J. B. C. Jackson. 1999. Pleistocene reef environments, constituent grains, and coral community structure: Curacao, Netherlands Antilles. Coral Reefs 18:107-122
Acropora cervicornis	-69.1333	12.3	J. M. Pandolfi. 2001. Community structure of Pleistocene coral reefs of Curacao, Netherlands Antilles. Ecological Monographs 71(1):49-67
Acropora cervicornis	-69.1	12.3667	J. M. Pandolfi. 2001. Community structure of Pleistocene coral reefs of Curacao, Netherlands Antilles. Ecological Monographs 71(1):49-67
Acropora cervicornis	-81.7167	12.5	J. M. Pandolfi and J. B. C. Jackson. 2007. Broad-scale patterns in Pleistocene coral reef communities from the Caribbean: implications for ecology and management. In R. B. Aronson (ed.), Geological approaches to coral reef ecology. Ecological Studies 192:201-236
Acropora cervicornis	-81.7	12.5333	J. M. Pandolfi and J. B. C. Jackson. 2007. Broad-scale patterns in Pleistocene coral reef communities from the Caribbean: implications for ecology and management. In R. B. Aronson (ed.), Geological approaches to coral reef ecology. Ecological Studies 192:201-236
Acropora cervicornis	-81.7167	12.5667	J. M. Pandolfi and J. B. C. Jackson. 2007. Broad-scale patterns in Pleistocene coral reef communities from the Caribbean: implications for ecology and management. In R. B. Aronson (ed.), Geological approaches to coral reef ecology. Ecological Studies 192:201-236
Acropora cervicornis	-59.5333	13.0667	G. Schellmann and U. Radtke. 2004. A revised morpho- and chronostratigraphy of the Late and Middle\r\nPleistocene coral reef terraces on Southern Barbados (West Indies). Earth-Science Reviews 64:157-187
Acropora cervicornis	-81.3667	13.35	J. M. Pandolfi and J. B. C. Jackson. 2007. Broad-scale patterns in Pleistocene coral reef communities from the Caribbean: implications for ecology and management. In R. B. Aronson (ed.), Geological approaches to coral reef ecology. Ecological Studies 192:201-236
Acropora cervicornis	-88	17	E. Gischler. 2007. Pleistocene facies of Belize barrier and atoll reefs. Facies 53(1):27-41
Acropora cervicornis	-64.7	17.75	M. A. Toscano, I. G. Macintyre, and J. Lundberg. 2012. Last interglacial reef limestones, northeastern St. Croix, US Virgin Islands â€” evidence of tectonic tilting and subsidence since MIS 5.5. Coral Reefs 31(1):27-38
Acropora cervicornis	-76.3167	17.8833	S. A. James. 2006. Coral Biodiversity and Zonation on a Pleistocene Reef, Southeastern Jamaica. Jamaica Clearing House Mechanism
Acropora cervicornis	-87.9	18	S. J. Mazzullo. 2006. Late Pliocene to Holocene platform evolution in northern Belize, and comparison with coeval deposits in southern Belize and the Bahamas. Sedimentology 53:1015-1047
Acropora cervicornis	-87.8167	18.1167	S. J. Mazzullo. 2006. Late Pliocene to Holocene platform evolution in northern Belize, and comparison with coeval deposits in southern Belize and the Bahamas. Sedimentology 53:1015-1047
Acropora cervicornis	-69.5167	18.4167	J. S. Klaus and A. F. Budd. 2003. Comparison of Caribbean coral reef communities before and after Plio-Pleistocene faunal turnover: Analyses of two Dominican Republic reef sequences. Palaios 18(1):3-21
Acropora cervicornis	-77.3333	18.5	S. K. Boss and W. D. Liddell. 1987. Back-reef and Fore-reef Analogs in the Pleistocene of North Jamaica: Implications for Facies Recognition and Sediment Flux in Fossil reefs. Palaios 2:219-228
Acropora cervicornis	-81.3833	19.2667	I. G. Hunter and B. Jones. 1996. Coral associations of the Pleistocene Ironshore Formation, Grand Cayman. Coral Reefs 15(4):249-267
Acropora cervicornis	-81.3833	19.2833	I. G. Hunter and B. Jones. 1996. Coral associations of the Pleistocene Ironshore Formation, Grand Cayman. Coral Reefs 15(4):249-267
Acropora cervicornis	-81.15	19.2833	I. G. Hunter and B. Jones. 1996. Coral associations of the Pleistocene Ironshore Formation, Grand Cayman. Coral Reefs 15(4):249-267
Acropora cervicornis	-81.0833	19.35	I. G. Hunter and B. Jones. 1996. Coral associations of the Pleistocene Ironshore Formation, Grand Cayman. Coral Reefs 15(4):249-267
Acropora cervicornis	-81.4	19.3667	I. G. Hunter and B. Jones. 1996. Coral associations of the Pleistocene Ironshore Formation, Grand Cayman. Coral Reefs 15(4):249-267
Acropora cervicornis	-81.4167	19.3667	I. G. Hunter and B. Jones. 1996. Coral associations of the Pleistocene Ironshore Formation, Grand Cayman. Coral Reefs 15(4):249-267
Acropora cervicornis	-81.4	19.3833	I. G. Hunter and B. Jones. 1996. Coral associations of the Pleistocene Ironshore Formation, Grand Cayman. Coral Reefs 15(4):249-267
Acropora cervicornis	-81.3833	19.3833	I. G. Hunter and B. Jones. 1996. Coral associations of the Pleistocene Ironshore Formation, Grand Cayman. Coral Reefs 15(4):249-267
Acropora cervicornis	-87.1167	20.5667	P. Blanchon, A. Eisenhauer, and J. Fietzke, V. Liebetrau. 2009. Rapid sea-level rise and reef back-stepping at the close of the last interglacial highstand. Nature 458:881-884
Acropora cervicornis	-87.1208	20.5778	E. JordÃ¡n-Dahlgren. 1997. A Caribbean coral reef community of the Pleistocene. Proceedings of the 8th International Coral Reef Symposium 2:1681-1686
Acropora cervicornis	-73.6833	21.0167	P. Kindler, J. L. Reyss, and C. Cazala, V. Plagnes. 2007. Discovery of a composite reefal terrace of Middle and Late Pleistocene age in Great Inagua Island, Bahamas - implications for regional tectonics and sea-level history. Sedimentary Geology 194:141-147
Acropora cervicornis	-73.7167	21.0167	J. H. Chen, H. A. Curren, and B. White, G. J. Wasserburg. 1991. Precise chronology of the last interglacial period: 234U-230Th data from fossil coral reefs in the Bahamas. Geological Society America Bulletin 103:82-97
Acropora cervicornis	-74.5167	24.0333	B. J. Greenstein, L. A. Harris, and H. A. Curran. 1998. Comparison of recent coral life and death assemblages to Pleistocene reef communities: implications for rapid faunal replacement on recent reefs. Carbonates and Evaporites 13(1):23-31
Acropora cervicornis	-74.5333	24.05	A. F. Budd and J. M. Pandolfi. 2004. Overlapping species boundaries and hybridization within the Montastrea "annularis" reef coral complex in the Pleistocene of the Bahama Islands. Paleobiology 30(3):396-425
Acropora cervicornis	-74.5167	24.0833	A. F. Budd and J. M. Pandolfi. 2004. Overlapping species boundaries and hybridization within the Montastrea "annularis" reef coral complex in the Pleistocene of the Bahama Islands. Paleobiology 30(3):396-425
Acropora cervicornis	-81.5667	24.6667	N. E. Weisbord. 1974. Late Cenozoic corals of south Florida. Bulletins of American Paleontology 66(285):259-544
Acropora cervicornis	-81.5831	24.6672	G. Multer, E. Gischler, and J. Lundberg, K. R. Simmons, E. A. Shinn. 2002. Key Largo Limestone Revisited: Pleistocene Shelf-edge Facies, Florida Keys, USA. Facies 46:229-272
Acropora cervicornis	-80.5833	24.9333	B. J. Greenstein, H. A. Curran, and J. M. Pandolfi. 1998. Shifting ecological baselines and the demise of Acropora cervicornis in the western North Atlantic and Caribbean Province: a Pleistocene perspective. Coral Reefs 17:249-261
Acropora cervicornis	-77.9333	24.9833	A. F. Budd and J. M. Pandolfi. 2004. Overlapping species boundaries and hybridization within the Montastrea "annularis" reef coral complex in the Pleistocene of the Bahama Islands. Paleobiology 30(3):396-425
Acropora cervicornis	-78	25.1333	A. F. Budd and J. M. Pandolfi. 2004. Overlapping species boundaries and hybridization within the Montastrea "annularis" reef coral complex in the Pleistocene of the Bahama Islands. Paleobiology 30(3):396-425
Acropora cervicornis	-80.3833	25.1333	B. J. Greenstein, H. A. Curran, and J. M. Pandolfi. 1998. Shifting ecological baselines and the demise of Acropora cervicornis in the western North Atlantic and Caribbean Province: a Pleistocene perspective. Coral Reefs 17:249-261
Acropora clathrata	33.5833	27.65	A. S. El-Sorogy. 2002. Paleontology and depositional environments of the Pleistocene coral reefs of the Gulf of Suez, Egypt. Neues Jahrbuch fÃ¼r Geologie und PalÃ¤ontologie, Abhandlungen 225(3):337-371
Acropora clathrata	33.5	27.9333	A. S. El-Sorogy. 2002. Paleontology and depositional environments of the Pleistocene coral reefs of the Gulf of Suez, Egypt. Neues Jahrbuch fÃ¼r Geologie und PalÃ¤ontologie, Abhandlungen 225(3):337-371
Acropora digitifera	113.733	-28.4167	B. J. Greenstein and J. M. Pandolfi. 2008. Escaping the heat: range shifts of reef coral taxa in coastal Western Australia. Global Change Biology 14:513-528
Acropora digitifera	113.833	-22.2167	B. J. Greenstein and J. M. Pandolfi. 2008. Escaping the heat: range shifts of reef coral taxa in coastal Western Australia. Global Change Biology 14:513-528
Acropora divaricata	114.933	-29.2667	B. J. Greenstein and J. M. Pandolfi. 2008. Escaping the heat: range shifts of reef coral taxa in coastal Western Australia. Global Change Biology 14:513-528
Acropora divaricata	114.9	-29.2667	B. J. Greenstein and J. M. Pandolfi. 2008. Escaping the heat: range shifts of reef coral taxa in coastal Western Australia. Global Change Biology 14:513-528
Acropora divaricata	113.717	-28.4333	B. J. Greenstein and J. M. Pandolfi. 2008. Escaping the heat: range shifts of reef coral taxa in coastal Western Australia. Global Change Biology 14:513-528
Acropora divaricata	113.383	-24.2167	B. J. Greenstein and J. M. Pandolfi. 2008. Escaping the heat: range shifts of reef coral taxa in coastal Western Australia. Global Change Biology 14:513-528
Acropora divaricata	113.4	-24.05	B. J. Greenstein and J. M. Pandolfi. 2008. Escaping the heat: range shifts of reef coral taxa in coastal Western Australia. Global Change Biology 14:513-528
Acropora divaricata	113.433	-24.0333	B. J. Greenstein and J. M. Pandolfi. 2008. Escaping the heat: range shifts of reef coral taxa in coastal Western Australia. Global Change Biology 14:513-528
Acropora donei	113.733	-28.4167	B. J. Greenstein and J. M. Pandolfi. 2008. Escaping the heat: range shifts of reef coral taxa in coastal Western Australia. Global Change Biology 14:513-528
Acropora florida	113.733	-28.4167	B. J. Greenstein and J. M. Pandolfi. 2008. Escaping the heat: range shifts of reef coral taxa in coastal Western Australia. Global Change Biology 14:513-528
Acropora gemmifera	113.833	-22.2167	B. J. Greenstein and J. M. Pandolfi. 2008. Escaping the heat: range shifts of reef coral taxa in coastal Western Australia. Global Change Biology 14:513-528
Acropora gemmifera	147.783	-6.31667	J. M. Pandolfi. 1996. Limited membership in Pleistocene reef coral assemblages from the Huon Peninsula, Papua New Guinea: constancy during global change. Paleobiology 22(2):152-176
Acropora gemmifera	147.683	-6.25	J. M. Pandolfi. 1996. Limited membership in Pleistocene reef coral assemblages from the Huon Peninsula, Papua New Guinea: constancy during global change. Paleobiology 22(2):152-176
Acropora gemmifera	147.667	-6.21667	J. M. Pandolfi. 1996. Limited membership in Pleistocene reef coral assemblages from the Huon Peninsula, Papua New Guinea: constancy during global change. Paleobiology 22(2):152-176
Acropora gemmifera	147.6	-6.08333	J. M. Pandolfi. 1996. Limited membership in Pleistocene reef coral assemblages from the Huon Peninsula, Papua New Guinea: constancy during global change. Paleobiology 22(2):152-176
Acropora grandis	113.733	-28.4167	B. J. Greenstein and J. M. Pandolfi. 2008. Escaping the heat: range shifts of reef coral taxa in coastal Western Australia. Global Change Biology 14:513-528
Acropora hemprichii	43.15	11.6	E. Montanaro Gallitelli. 1973. Ricerche eseguite negli anni 1941-1942 sopra i Coralli delle scogliere emerse di Massaua e Gibuti [Research done between 1941 and 1942 on emersed coral reefs of Massawa and Djibouti]. Missione Geologica dell'Azienda Generale Italiana Petroli (AGIP) nella Dancalia Meridionale e sugli Altipiani Hararini (1936-1938) 4(2):446-519
Acropora hemprichii	39.4667	15.6167	E. Montanaro Gallitelli. 1973. Ricerche eseguite negli anni 1941-1942 sopra i Coralli delle scogliere emerse di Massaua e Gibuti [Research done between 1941 and 1942 on emersed coral reefs of Massawa and Djibouti]. Missione Geologica dell'Azienda Generale Italiana Petroli (AGIP) nella Dancalia Meridionale e sugli Altipiani Hararini (1936-1938) 4(2):446-519
Acropora horrida	33.5833	27.65	A. S. El-Sorogy. 2002. Paleontology and depositional environments of the Pleistocene coral reefs of the Gulf of Suez, Egypt. Neues Jahrbuch fÃ¼r Geologie und PalÃ¤ontologie, Abhandlungen 225(3):337-371
Acropora horrida	33.5	27.9333	A. S. El-Sorogy. 2002. Paleontology and depositional environments of the Pleistocene coral reefs of the Gulf of Suez, Egypt. Neues Jahrbuch fÃ¼r Geologie und PalÃ¤ontologie, Abhandlungen 225(3):337-371
Acropora humilis	115.517	-32	B. J. Greenstein and J. M. Pandolfi. 2008. Escaping the heat: range shifts of reef coral taxa in coastal Western Australia. Global Change Biology 14:513-528
Acropora humilis	115.5	-32	B. J. Greenstein and J. M. Pandolfi. 2008. Escaping the heat: range shifts of reef coral taxa in coastal Western Australia. Global Change Biology 14:513-528
Acropora humilis	114.933	-29.2667	B. J. Greenstein and J. M. Pandolfi. 2008. Escaping the heat: range shifts of reef coral taxa in coastal Western Australia. Global Change Biology 14:513-528
Acropora humilis	114.9	-29.2667	B. J. Greenstein and J. M. Pandolfi. 2008. Escaping the heat: range shifts of reef coral taxa in coastal Western Australia. Global Change Biology 14:513-528
Acropora humilis	113.717	-28.4333	B. J. Greenstein and J. M. Pandolfi. 2008. Escaping the heat: range shifts of reef coral taxa in coastal Western Australia. Global Change Biology 14:513-528
Acropora humilis	113.733	-28.4167	B. J. Greenstein and J. M. Pandolfi. 2008. Escaping the heat: range shifts of reef coral taxa in coastal Western Australia. Global Change Biology 14:513-528
Acropora humilis	113.383	-24.2167	B. J. Greenstein and J. M. Pandolfi. 2008. Escaping the heat: range shifts of reef coral taxa in coastal Western Australia. Global Change Biology 14:513-528
Acropora humilis	113.4	-24.05	B. J. Greenstein and J. M. Pandolfi. 2008. Escaping the heat: range shifts of reef coral taxa in coastal Western Australia. Global Change Biology 14:513-528
Acropora humilis	113.433	-24.0333	B. J. Greenstein and J. M. Pandolfi. 2008. Escaping the heat: range shifts of reef coral taxa in coastal Western Australia. Global Change Biology 14:513-528
Acropora humilis	113.833	-22.2167	B. J. Greenstein and J. M. Pandolfi. 2008. Escaping the heat: range shifts of reef coral taxa in coastal Western Australia. Global Change Biology 14:513-528
Acropora humilis	114.117	-21.8	B. J. Greenstein and J. M. Pandolfi. 2008. Escaping the heat: range shifts of reef coral taxa in coastal Western Australia. Global Change Biology 14:513-528
Acropora humilis	46.4467	-9.42194	J. D. Taylor. 1978. Faunal response to the instability of reef habitats: Pleistocene molluscan assemblages of Aldabra Atoll. Palaeontology 21(1):1-30
Acropora humilis	35.4667	27.6833	W-C. Dullo. 1990. Facies, Fossil Record, and Age of Pleistocene Reefs from the Red Sea (Saudi Arabia). Facies 22:1-46
Acropora hyacinthus	115.517	-32	B. J. Greenstein and J. M. Pandolfi. 2008. Escaping the heat: range shifts of reef coral taxa in coastal Western Australia. Global Change Biology 14:513-528
Acropora hyacinthus	115.5	-32	B. J. Greenstein and J. M. Pandolfi. 2008. Escaping the heat: range shifts of reef coral taxa in coastal Western Australia. Global Change Biology 14:513-528
Acropora hyacinthus	114.933	-29.2667	B. J. Greenstein and J. M. Pandolfi. 2008. Escaping the heat: range shifts of reef coral taxa in coastal Western Australia. Global Change Biology 14:513-528
Acropora hyacinthus	114.9	-29.2667	B. J. Greenstein and J. M. Pandolfi. 2008. Escaping the heat: range shifts of reef coral taxa in coastal Western Australia. Global Change Biology 14:513-528
Acropora hyacinthus	113.717	-28.4333	B. J. Greenstein and J. M. Pandolfi. 2008. Escaping the heat: range shifts of reef coral taxa in coastal Western Australia. Global Change Biology 14:513-528
Acropora hyacinthus	113.733	-28.4167	B. J. Greenstein and J. M. Pandolfi. 2008. Escaping the heat: range shifts of reef coral taxa in coastal Western Australia. Global Change Biology 14:513-528
Acropora hyacinthus	113.383	-24.2167	B. J. Greenstein and J. M. Pandolfi. 2008. Escaping the heat: range shifts of reef coral taxa in coastal Western Australia. Global Change Biology 14:513-528
Acropora hyacinthus	113.4	-24.05	B. J. Greenstein and J. M. Pandolfi. 2008. Escaping the heat: range shifts of reef coral taxa in coastal Western Australia. Global Change Biology 14:513-528
Acropora hyacinthus	113.433	-24.0333	B. J. Greenstein and J. M. Pandolfi. 2008. Escaping the heat: range shifts of reef coral taxa in coastal Western Australia. Global Change Biology 14:513-528
Acropora hyacinthus	114.117	-21.8	B. J. Greenstein and J. M. Pandolfi. 2008. Escaping the heat: range shifts of reef coral taxa in coastal Western Australia. Global Change Biology 14:513-528
Acropora hyacinthus	46.4467	-9.42194	J. D. Taylor. 1978. Faunal response to the instability of reef habitats: Pleistocene molluscan assemblages of Aldabra Atoll. Palaeontology 21(1):1-30
Acropora hyacinthus	147.783	-6.31667	J. M. Pandolfi. 1996. Limited membership in Pleistocene reef coral assemblages from the Huon Peninsula, Papua New Guinea: constancy during global change. Paleobiology 22(2):152-176
Acropora hyacinthus	147.667	-6.21667	J. M. Pandolfi. 1996. Limited membership in Pleistocene reef coral assemblages from the Huon Peninsula, Papua New Guinea: constancy during global change. Paleobiology 22(2):152-176
Acropora hyacinthus	147.6	-6.08333	J. M. Pandolfi. 1996. Limited membership in Pleistocene reef coral assemblages from the Huon Peninsula, Papua New Guinea: constancy during global change. Paleobiology 22(2):152-176
Acropora hyacinthus	39.7	-4	J. A. Crame. 1980. Succession and diversity in the Pleistocene coral reefs of the Kenya Coast. Palaeontology 23(1):1-37
Acropora hyacinthus	40.1333	-3.25	J. A. Crame. 1980. Succession and diversity in the Pleistocene coral reefs of the Kenya Coast. Palaeontology 23(1):1-37
Acropora hyacinthus	35.4667	27.6833	W-C. Dullo. 1990. Facies, Fossil Record, and Age of Pleistocene Reefs from the Red Sea (Saudi Arabia). Facies 22:1-46
Acropora hyacinthus	129.928	28.3214	T. Nakamori. 1986. Community Structures of Recent and Pleistocene Hermatypic Corals in the Ryukyu Islands, Japan. Tohoku University Science Reports, Second Series, Geology 56(2):71-133
Acropora intermedia	113.733	-28.4167	B. J. Greenstein and J. M. Pandolfi. 2008. Escaping the heat: range shifts of reef coral taxa in coastal Western Australia. Global Change Biology 14:513-528
Acropora lamarcki	46.4467	-9.42194	J. D. Taylor. 1978. Faunal response to the instability of reef habitats: Pleistocene molluscan assemblages of Aldabra Atoll. Palaeontology 21(1):1-30
Acropora lamarcki	43.15	11.6	E. Montanaro Gallitelli. 1973. Ricerche eseguite negli anni 1941-1942 sopra i Coralli delle scogliere emerse di Massaua e Gibuti [Research done between 1941 and 1942 on emersed coral reefs of Massawa and Djibouti]. Missione Geologica dell'Azienda Generale Italiana Petroli (AGIP) nella Dancalia Meridionale e sugli Altipiani Hararini (1936-1938) 4(2):446-519
Acropora latistella	113.717	-28.4333	B. J. Greenstein and J. M. Pandolfi. 2008. Escaping the heat: range shifts of reef coral taxa in coastal Western Australia. Global Change Biology 14:513-528
Acropora latistella	113.733	-28.4167	B. J. Greenstein and J. M. Pandolfi. 2008. Escaping the heat: range shifts of reef coral taxa in coastal Western Australia. Global Change Biology 14:513-528
Acropora loveli	113.433	-24.0333	B. J. Greenstein and J. M. Pandolfi. 2008. Escaping the heat: range shifts of reef coral taxa in coastal Western Australia. Global Change Biology 14:513-528
Acropora millepora	115.5	-32	B. J. Greenstein and J. M. Pandolfi. 2008. Escaping the heat: range shifts of reef coral taxa in coastal Western Australia. Global Change Biology 14:513-528
Acropora millepora	113.433	-24.0333	B. J. Greenstein and J. M. Pandolfi. 2008. Escaping the heat: range shifts of reef coral taxa in coastal Western Australia. Global Change Biology 14:513-528
Acropora millepora	114.117	-21.8	B. J. Greenstein and J. M. Pandolfi. 2008. Escaping the heat: range shifts of reef coral taxa in coastal Western Australia. Global Change Biology 14:513-528
Acropora monticulosa	145.75	-15.3333	J. M. Webster and P. J. Davies. 2003. Coral variation in two deep drill cores: significance for the Pleistocene development of the Great Barrier Reef. Sedimentary Geology 159(1-2):61-80
Acropora muricata	114.9	-29.2667	B. J. Greenstein and J. M. Pandolfi. 2008. Escaping the heat: range shifts of reef coral taxa in coastal Western Australia. Global Change Biology 14:513-528
Acropora muricata	113.717	-28.4333	B. J. Greenstein and J. M. Pandolfi. 2008. Escaping the heat: range shifts of reef coral taxa in coastal Western Australia. Global Change Biology 14:513-528
Acropora muricata	113.4	-24.05	B. J. Greenstein and J. M. Pandolfi. 2008. Escaping the heat: range shifts of reef coral taxa in coastal Western Australia. Global Change Biology 14:513-528
Acropora muricata	113.433	-24.0333	B. J. Greenstein and J. M. Pandolfi. 2008. Escaping the heat: range shifts of reef coral taxa in coastal Western Australia. Global Change Biology 14:513-528
Acropora muricata	46.4467	-9.42194	J. D. Taylor. 1978. Faunal response to the instability of reef habitats: Pleistocene molluscan assemblages of Aldabra Atoll. Palaeontology 21(1):1-30
Acropora muricata	39.6833	-4.05	J. A. Crame. 1980. Succession and diversity in the Pleistocene coral reefs of the Kenya Coast. Palaeontology 23(1):1-37
Acropora nasuta	113.717	-28.4333	B. J. Greenstein and J. M. Pandolfi. 2008. Escaping the heat: range shifts of reef coral taxa in coastal Western Australia. Global Change Biology 14:513-528
Acropora nasuta	113.733	-28.4167	B. J. Greenstein and J. M. Pandolfi. 2008. Escaping the heat: range shifts of reef coral taxa in coastal Western Australia. Global Change Biology 14:513-528
Acropora palmata	-64.6167	11.85	C. Schubert. 1997. Pleistocene marine terraces of la Blanquilla island, Venezuela, and their diagenesis. Proceedings, Third International Coral Reef Symposium 2:149-154
Acropora palmata	-68.9833	12.1333	J. M. Pandolfi. 2001. Community structure of Pleistocene coral reefs of Curacao, Netherlands Antilles. Ecological Monographs 71(1):49-67
Acropora palmata	-68.8833	12.1667	J. M. Pandolfi. 2001. Community structure of Pleistocene coral reefs of Curacao, Netherlands Antilles. Ecological Monographs 71(1):49-67
Acropora palmata	-69.0833	12.2	J. M. Pandolfi. 2001. Community structure of Pleistocene coral reefs of Curacao, Netherlands Antilles. Ecological Monographs 71(1):49-67
Acropora palmata	-69.0167	12.2333	J. M. Pandolfi. 2001. Community structure of Pleistocene coral reefs of Curacao, Netherlands Antilles. Ecological Monographs 71(1):49-67
Acropora palmata	-69.0667	12.2833	J. M. Pandolfi, G. Llewellyn, and J. B. C. Jackson. 1999. Pleistocene reef environments, constituent grains, and coral community structure: Curacao, Netherlands Antilles. Coral Reefs 18:107-122
Acropora palmata	-69.1333	12.3	J. M. Pandolfi. 2001. Community structure of Pleistocene coral reefs of Curacao, Netherlands Antilles. Ecological Monographs 71(1):49-67
Acropora palmata	-69.1	12.3667	J. M. Pandolfi. 2001. Community structure of Pleistocene coral reefs of Curacao, Netherlands Antilles. Ecological Monographs 71(1):49-67
Acropora palmata	-81.7167	12.5	J. M. Pandolfi and J. B. C. Jackson. 2007. Broad-scale patterns in Pleistocene coral reef communities from the Caribbean: implications for ecology and management. In R. B. Aronson (ed.), Geological approaches to coral reef ecology. Ecological Studies 192:201-236
Acropora palmata	-81.7	12.5333	J. M. Pandolfi and J. B. C. Jackson. 2007. Broad-scale patterns in Pleistocene coral reef communities from the Caribbean: implications for ecology and management. In R. B. Aronson (ed.), Geological approaches to coral reef ecology. Ecological Studies 192:201-236
Acropora palmata	-81.7167	12.5667	J. M. Pandolfi and J. B. C. Jackson. 2007. Broad-scale patterns in Pleistocene coral reef communities from the Caribbean: implications for ecology and management. In R. B. Aronson (ed.), Geological approaches to coral reef ecology. Ecological Studies 192:201-236
Acropora palmata	-59.5333	13.0667	G. Schellmann and U. Radtke. 2004. A revised morpho- and chronostratigraphy of the Late and Middle\r\nPleistocene coral reef terraces on Southern Barbados (West Indies). Earth-Science Reviews 64:157-187
Acropora palmata	-81.3667	13.35	J. M. Pandolfi and J. B. C. Jackson. 2007. Broad-scale patterns in Pleistocene coral reef communities from the Caribbean: implications for ecology and management. In R. B. Aronson (ed.), Geological approaches to coral reef ecology. Ecological Studies 192:201-236
Acropora palmata	-61.2167	15.8833	N. Feuillet, P. Tapponnier, and I. Manighetti, B. Villemant, G. C. P. King, . 2004. Differential uplift and tilt of Pleistocene reef platforms and Quaternary slip rate on the Morne-Piton normal fault (Guadeloupe, French West Indies). Journal of Geophysical Research 109(B02404):1-18
Acropora palmata	-88	17	E. Gischler. 2007. Pleistocene facies of Belize barrier and atoll reefs. Facies 53(1):27-41
Acropora palmata	-64.6	17.75	M. A. Toscano, I. G. Macintyre, and J. Lundberg. 2012. Last interglacial reef limestones, northeastern St. Croix, US Virgin Islands â€” evidence of tectonic tilting and subsidence since MIS 5.5. Coral Reefs 31(1):27-38
Acropora palmata	-64.7	17.75	M. A. Toscano, I. G. Macintyre, and J. Lundberg. 2012. Last interglacial reef limestones, northeastern St. Croix, US Virgin Islands â€” evidence of tectonic tilting and subsidence since MIS 5.5. Coral Reefs 31(1):27-38
Acropora palmata	-76.3167	17.8667	S. F. Mitchell, R. K. Pickerill, and T. A. Stemann. 2001. The Port Morant Formation (Upper Pleistocene, Jamaica): high resolution sedimentology and paleoenvironmental analysis of a mixed carbonate clastic lagoonal succession. Sedimentary Geology 144:291-306
Acropora palmata	-76.3167	17.8833	S. A. James. 2006. Coral Biodiversity and Zonation on a Pleistocene Reef, Southeastern Jamaica. Jamaica Clearing House Mechanism
Acropora palmata	-87.8167	18.1167	S. J. Mazzullo. 2006. Late Pliocene to Holocene platform evolution in northern Belize, and comparison with coeval deposits in southern Belize and the Bahamas. Sedimentology 53:1015-1047
Acropora palmata	-69.5167	18.4167	J. S. Klaus and A. F. Budd. 2003. Comparison of Caribbean coral reef communities before and after Plio-Pleistocene faunal turnover: Analyses of two Dominican Republic reef sequences. Palaios 18(1):3-21
Acropora palmata	-77.3333	18.5	S. K. Boss and W. D. Liddell. 1987. Back-reef and Fore-reef Analogs in the Pleistocene of North Jamaica: Implications for Facies Recognition and Sediment Flux in Fossil reefs. Palaios 2:219-228
Acropora palmata	-81.3667	19.2667	I. G. Hunter and B. Jones. 1996. Coral associations of the Pleistocene Ironshore Formation, Grand Cayman. Coral Reefs 15(4):249-267
Acropora palmata	-81.3833	19.2667	I. G. Hunter and B. Jones. 1996. Coral associations of the Pleistocene Ironshore Formation, Grand Cayman. Coral Reefs 15(4):249-267
Acropora palmata	-81.3833	19.2833	I. G. Hunter and B. Jones. 1996. Coral associations of the Pleistocene Ironshore Formation, Grand Cayman. Coral Reefs 15(4):249-267
Acropora palmata	-81.15	19.2833	I. G. Hunter and B. Jones. 1996. Coral associations of the Pleistocene Ironshore Formation, Grand Cayman. Coral Reefs 15(4):249-267
Acropora palmata	-81.3667	19.35	I. G. Hunter and B. Jones. 1996. Coral associations of the Pleistocene Ironshore Formation, Grand Cayman. Coral Reefs 15(4):249-267
Acropora palmata	-81.0833	19.35	I. G. Hunter and B. Jones. 1996. Coral associations of the Pleistocene Ironshore Formation, Grand Cayman. Coral Reefs 15(4):249-267
Acropora palmata	-81.4167	19.3667	I. G. Hunter and B. Jones. 1996. Coral associations of the Pleistocene Ironshore Formation, Grand Cayman. Coral Reefs 15(4):249-267
Acropora palmata	-81.4	19.3667	I. G. Hunter and B. Jones. 1996. Coral associations of the Pleistocene Ironshore Formation, Grand Cayman. Coral Reefs 15(4):249-267
Acropora palmata	-81.4	19.3833	I. G. Hunter and B. Jones. 1996. Coral associations of the Pleistocene Ironshore Formation, Grand Cayman. Coral Reefs 15(4):249-267
Acropora palmata	-80.1	19.65	D. R. Stoddart. 1980. Geology and geomorphology of Little Cayman. Atoll Research Bulletin 241:11-16
Acropora palmata	-87.1167	20.5667	P. Blanchon, A. Eisenhauer, and J. Fietzke, V. Liebetrau. 2009. Rapid sea-level rise and reef back-stepping at the close of the last interglacial highstand. Nature 458:881-884
Acropora palmata	-87.1208	20.5778	E. JordÃ¡n-Dahlgren. 1997. A Caribbean coral reef community of the Pleistocene. Proceedings of the 8th International Coral Reef Symposium 2:1681-1686
Acropora palmata	-73.6833	21.0167	P. Kindler, J. L. Reyss, and C. Cazala, V. Plagnes. 2007. Discovery of a composite reefal terrace of Middle and Late Pleistocene age in Great Inagua Island, Bahamas - implications for regional tectonics and sea-level history. Sedimentary Geology 194:141-147
Acropora palmata	-73.7167	21.0167	J. H. Chen, H. A. Curren, and B. White, G. J. Wasserburg. 1991. Precise chronology of the last interglacial period: 234U-230Th data from fossil coral reefs in the Bahamas. Geological Society America Bulletin 103:82-97
Acropora palmata	-74.5167	24.0333	B. J. Greenstein, L. A. Harris, and H. A. Curran. 1998. Comparison of recent coral life and death assemblages to Pleistocene reef communities: implications for rapid faunal replacement on recent reefs. Carbonates and Evaporites 13(1):23-31
Acropora palmata	-74.5333	24.05	A. F. Budd and J. M. Pandolfi. 2004. Overlapping species boundaries and hybridization within the Montastrea "annularis" reef coral complex in the Pleistocene of the Bahama Islands. Paleobiology 30(3):396-425
Acropora palmata	-74.5167	24.0833	A. F. Budd and J. M. Pandolfi. 2004. Overlapping species boundaries and hybridization within the Montastrea "annularis" reef coral complex in the Pleistocene of the Bahama Islands. Paleobiology 30(3):396-425
Acropora palmata	-81.5667	24.6667	N. E. Weisbord. 1974. Late Cenozoic corals of south Florida. Bulletins of American Paleontology 66(285):259-544
Acropora palmata	-81.5831	24.6672	G. Multer, E. Gischler, and J. Lundberg, K. R. Simmons, E. A. Shinn. 2002. Key Largo Limestone Revisited: Pleistocene Shelf-edge Facies, Florida Keys, USA. Facies 46:229-272
Acropora palmata	-80.6	24.9333	D. R. Muhs, K. R. Simmons, and R. R. Schumann, R. B. Halley. 2011. Sea-level history of the past two interglacial periods: new evidence from U-series dating of reef corals from south Florida. Quaternary Science Reviews 30:570-590
Acropora pharaonis	43.15	11.6	E. Montanaro Gallitelli. 1973. Ricerche eseguite negli anni 1941-1942 sopra i Coralli delle scogliere emerse di Massaua e Gibuti [Research done between 1941 and 1942 on emersed coral reefs of Massawa and Djibouti]. Missione Geologica dell'Azienda Generale Italiana Petroli (AGIP) nella Dancalia Meridionale e sugli Altipiani Hararini (1936-1938) 4(2):446-519
Acropora pharaonis	39.4667	15.6167	E. Montanaro Gallitelli. 1973. Ricerche eseguite negli anni 1941-1942 sopra i Coralli delle scogliere emerse di Massaua e Gibuti [Research done between 1941 and 1942 on emersed coral reefs of Massawa and Djibouti]. Missione Geologica dell'Azienda Generale Italiana Petroli (AGIP) nella Dancalia Meridionale e sugli Altipiani Hararini (1936-1938) 4(2):446-519
Acropora pharaonis	38.9333	22.8	A. El-Sorogy, M. Youssef, and M. Al-Sabrouty, N. Al-Otaiby. 2013. Facies pattern and molluscan fauna of the Late Pleistocene raised coral reef of Rabigh area, Red Sea coast, Saudi Arabia.
Acropora pharaonis	34.25	26.15	A. S. El-Sorogy. 1997. Progressive diagenetic sequence from Pleistocene coral reefs in the area between Quseir and Mersa Alam, Red Sea coast, Egypt. Egyptian journal of geology 41(1):519-540
Acropora pharaonis	35.4667	27.6833	W-C. Dullo. 1990. Facies, Fossil Record, and Age of Pleistocene Reefs from the Red Sea (Saudi Arabia). Facies 22:1-46
Acropora polystoma	39.4667	15.6167	E. Montanaro Gallitelli. 1973. Ricerche eseguite negli anni 1941-1942 sopra i Coralli delle scogliere emerse di Massaua e Gibuti [Research done between 1941 and 1942 on emersed coral reefs of Massawa and Djibouti]. Missione Geologica dell'Azienda Generale Italiana Petroli (AGIP) nella Dancalia Meridionale e sugli Altipiani Hararini (1936-1938) 4(2):446-519
Acropora robusta	115.5	-32	B. J. Greenstein and J. M. Pandolfi. 2008. Escaping the heat: range shifts of reef coral taxa in coastal Western Australia. Global Change Biology 14:513-528
Acropora robusta	114.9	-29.2667	B. J. Greenstein and J. M. Pandolfi. 2008. Escaping the heat: range shifts of reef coral taxa in coastal Western Australia. Global Change Biology 14:513-528
Acropora robusta	113.717	-28.4333	B. J. Greenstein and J. M. Pandolfi. 2008. Escaping the heat: range shifts of reef coral taxa in coastal Western Australia. Global Change Biology 14:513-528
Acropora robusta	113.733	-28.4167	B. J. Greenstein and J. M. Pandolfi. 2008. Escaping the heat: range shifts of reef coral taxa in coastal Western Australia. Global Change Biology 14:513-528
Acropora robusta	113.4	-24.05	B. J. Greenstein and J. M. Pandolfi. 2008. Escaping the heat: range shifts of reef coral taxa in coastal Western Australia. Global Change Biology 14:513-528
Acropora robusta	113.433	-24.0333	B. J. Greenstein and J. M. Pandolfi. 2008. Escaping the heat: range shifts of reef coral taxa in coastal Western Australia. Global Change Biology 14:513-528
Acropora robusta	145.75	-15.3333	J. M. Webster and P. J. Davies. 2003. Coral variation in two deep drill cores: significance for the Pleistocene development of the Great Barrier Reef. Sedimentary Geology 159(1-2):61-80
Acropora robusta	43.15	11.6	E. Montanaro Gallitelli. 1973. Ricerche eseguite negli anni 1941-1942 sopra i Coralli delle scogliere emerse di Massaua e Gibuti [Research done between 1941 and 1942 on emersed coral reefs of Massawa and Djibouti]. Missione Geologica dell'Azienda Generale Italiana Petroli (AGIP) nella Dancalia Meridionale e sugli Altipiani Hararini (1936-1938) 4(2):446-519
Acropora spicifera	113.733	-28.4167	B. J. Greenstein and J. M. Pandolfi. 2008. Escaping the heat: range shifts of reef coral taxa in coastal Western Australia. Global Change Biology 14:513-528
Acropora spicifera	114.117	-21.8	B. J. Greenstein and J. M. Pandolfi. 2008. Escaping the heat: range shifts of reef coral taxa in coastal Western Australia. Global Change Biology 14:513-528
Acropora valenciennesi	153.367	-29.1	J. Pickett. 1981. A Late Pleistocene coral fauna from Evans Head, N.S.W. Alcheringa 5:71-83
Acropora valida	43.15	11.6	E. Montanaro Gallitelli. 1973. Ricerche eseguite negli anni 1941-1942 sopra i Coralli delle scogliere emerse di Massaua e Gibuti [Research done between 1941 and 1942 on emersed coral reefs of Massawa and Djibouti]. Missione Geologica dell'Azienda Generale Italiana Petroli (AGIP) nella Dancalia Meridionale e sugli Altipiani Hararini (1936-1938) 4(2):446-519
Acropora yongei	43.15	11.6	E. Montanaro Gallitelli. 1973. Ricerche eseguite negli anni 1941-1942 sopra i Coralli delle scogliere emerse di Massaua e Gibuti [Research done between 1941 and 1942 on emersed coral reefs of Massawa and Djibouti]. Missione Geologica dell'Azienda Generale Italiana Petroli (AGIP) nella Dancalia Meridionale e sugli Altipiani Hararini (1936-1938) 4(2):446-519
Acropora yongei	35.4667	27.6833	W-C. Dullo. 1990. Facies, Fossil Record, and Age of Pleistocene Reefs from the Red Sea (Saudi Arabia). Facies 22:1-46
Agaricia agaricites	-68.8833	12.1667	J. M. Pandolfi. 2001. Community structure of Pleistocene coral reefs of Curacao, Netherlands Antilles. Ecological Monographs 71(1):49-67
Agaricia agaricites	-69.0167	12.2333	J. M. Pandolfi. 2001. Community structure of Pleistocene coral reefs of Curacao, Netherlands Antilles. Ecological Monographs 71(1):49-67
Agaricia agaricites	-69.0667	12.2833	J. M. Pandolfi, G. Llewellyn, and J. B. C. Jackson. 1999. Pleistocene reef environments, constituent grains, and coral community structure: Curacao, Netherlands Antilles. Coral Reefs 18:107-122
Agaricia agaricites	-69.1	12.3667	J. M. Pandolfi. 2001. Community structure of Pleistocene coral reefs of Curacao, Netherlands Antilles. Ecological Monographs 71(1):49-67
Agaricia agaricites	-81.7167	12.5	J. M. Pandolfi and J. B. C. Jackson. 2007. Broad-scale patterns in Pleistocene coral reef communities from the Caribbean: implications for ecology and management. In R. B. Aronson (ed.), Geological approaches to coral reef ecology. Ecological Studies 192:201-236
Agaricia agaricites	-81.7167	12.5667	J. M. Pandolfi and J. B. C. Jackson. 2007. Broad-scale patterns in Pleistocene coral reef communities from the Caribbean: implications for ecology and management. In R. B. Aronson (ed.), Geological approaches to coral reef ecology. Ecological Studies 192:201-236
Agaricia agaricites	-76.3167	17.8667	S. F. Mitchell, R. K. Pickerill, and T. A. Stemann. 2001. The Port Morant Formation (Upper Pleistocene, Jamaica): high resolution sedimentology and paleoenvironmental analysis of a mixed carbonate clastic lagoonal succession. Sedimentary Geology 144:291-306
Agaricia agaricites	-77.3333	18.5	S. K. Boss and W. D. Liddell. 1987. Back-reef and Fore-reef Analogs in the Pleistocene of North Jamaica: Implications for Facies Recognition and Sediment Flux in Fossil reefs. Palaios 2:219-228
Agaricia agaricites	-81.3333	19.2833	I. G. Hunter and B. Jones. 1996. Coral associations of the Pleistocene Ironshore Formation, Grand Cayman. Coral Reefs 15(4):249-267
Agaricia agaricites	-81.3833	19.2833	I. G. Hunter and B. Jones. 1996. Coral associations of the Pleistocene Ironshore Formation, Grand Cayman. Coral Reefs 15(4):249-267
Agaricia agaricites	-81.15	19.2833	I. G. Hunter and B. Jones. 1996. Coral associations of the Pleistocene Ironshore Formation, Grand Cayman. Coral Reefs 15(4):249-267
Agaricia agaricites	-81.3333	19.3	I. G. Hunter and B. Jones. 1996. Coral associations of the Pleistocene Ironshore Formation, Grand Cayman. Coral Reefs 15(4):249-267
Agaricia agaricites	-81.3667	19.3	I. G. Hunter and B. Jones. 1996. Coral associations of the Pleistocene Ironshore Formation, Grand Cayman. Coral Reefs 15(4):249-267
Agaricia agaricites	-81.3667	19.3167	I. G. Hunter and B. Jones. 1996. Coral associations of the Pleistocene Ironshore Formation, Grand Cayman. Coral Reefs 15(4):249-267
Agaricia agaricites	-81.3667	19.35	I. G. Hunter and B. Jones. 1996. Coral associations of the Pleistocene Ironshore Formation, Grand Cayman. Coral Reefs 15(4):249-267
Agaricia agaricites	-81.3833	19.3667	I. G. Hunter and B. Jones. 1996. Coral associations of the Pleistocene Ironshore Formation, Grand Cayman. Coral Reefs 15(4):249-267
Agaricia agaricites	-81.3667	19.3667	I. G. Hunter and B. Jones. 1996. Coral associations of the Pleistocene Ironshore Formation, Grand Cayman. Coral Reefs 15(4):249-267
Agaricia agaricites	-81.4	19.3667	I. G. Hunter and B. Jones. 1996. Coral associations of the Pleistocene Ironshore Formation, Grand Cayman. Coral Reefs 15(4):249-267
Agaricia agaricites	-81.4167	19.3667	I. G. Hunter and B. Jones. 1996. Coral associations of the Pleistocene Ironshore Formation, Grand Cayman. Coral Reefs 15(4):249-267
Agaricia agaricites	-81.4	19.3833	I. G. Hunter and B. Jones. 1996. Coral associations of the Pleistocene Ironshore Formation, Grand Cayman. Coral Reefs 15(4):249-267
Agaricia agaricites	-81.3833	19.3833	I. G. Hunter and B. Jones. 1996. Coral associations of the Pleistocene Ironshore Formation, Grand Cayman. Coral Reefs 15(4):249-267
Agaricia agaricites	-87.1208	20.5778	E. JordÃ¡n-Dahlgren. 1997. A Caribbean coral reef community of the Pleistocene. Proceedings of the 8th International Coral Reef Symposium 2:1681-1686
Agaricia agaricites	-73.6833	21.0167	A. F. Budd and J. M. Pandolfi. 2004. Overlapping species boundaries and hybridization within the Montastrea "annularis" reef coral complex in the Pleistocene of the Bahama Islands. Paleobiology 30(3):396-425
Agaricia agaricites	-81.5667	24.6667	N. E. Weisbord. 1974. Late Cenozoic corals of south Florida. Bulletins of American Paleontology 66(285):259-544
Agaricia agaricites	-80.5833	24.9333	B. J. Greenstein, H. A. Curran, and J. M. Pandolfi. 1998. Shifting ecological baselines and the demise of Acropora cervicornis in the western North Atlantic and Caribbean Province: a Pleistocene perspective. Coral Reefs 17:249-261
Agaricia agaricites	-80.3833	25.1333	B. J. Greenstein, H. A. Curran, and J. M. Pandolfi. 1998. Shifting ecological baselines and the demise of Acropora cervicornis in the western North Atlantic and Caribbean Province: a Pleistocene perspective. Coral Reefs 17:249-261
Agaricia fragilis	-81.3667	19.2667	I. G. Hunter and B. Jones. 1996. Coral associations of the Pleistocene Ironshore Formation, Grand Cayman. Coral Reefs 15(4):249-267
Agaricia fragilis	-81.3667	19.3	I. G. Hunter and B. Jones. 1996. Coral associations of the Pleistocene Ironshore Formation, Grand Cayman. Coral Reefs 15(4):249-267
Agaricia fragilis	-81.3833	19.3667	I. G. Hunter and B. Jones. 1996. Coral associations of the Pleistocene Ironshore Formation, Grand Cayman. Coral Reefs 15(4):249-267
Agaricia fragilis	-81.3667	19.3667	I. G. Hunter and B. Jones. 1996. Coral associations of the Pleistocene Ironshore Formation, Grand Cayman. Coral Reefs 15(4):249-267
Agaricia fragilis	-81.4	19.3833	I. G. Hunter and B. Jones. 1996. Coral associations of the Pleistocene Ironshore Formation, Grand Cayman. Coral Reefs 15(4):249-267
Alveopora spongiosa	168.255	-17.5775	H. Mewis. 2011. Field work Vanuatu.
Astrea annuligera	147.783	-6.31667	J. M. Pandolfi. 1996. Limited membership in Pleistocene reef coral assemblages from the Huon Peninsula, Papua New Guinea: constancy during global change. Paleobiology 22(2):152-176
Astrea annuligera	147.683	-6.25	J. M. Pandolfi. 1996. Limited membership in Pleistocene reef coral assemblages from the Huon Peninsula, Papua New Guinea: constancy during global change. Paleobiology 22(2):152-176
Astrea annuligera	147.667	-6.21667	J. M. Pandolfi. 1996. Limited membership in Pleistocene reef coral assemblages from the Huon Peninsula, Papua New Guinea: constancy during global change. Paleobiology 22(2):152-176
Astrea annuligera	147.6	-6.08333	J. M. Pandolfi. 1996. Limited membership in Pleistocene reef coral assemblages from the Huon Peninsula, Papua New Guinea: constancy during global change. Paleobiology 22(2):152-176
Astrea annuligera	39.4667	15.6167	E. Montanaro Gallitelli. 1973. Ricerche eseguite negli anni 1941-1942 sopra i Coralli delle scogliere emerse di Massaua e Gibuti [Research done between 1941 and 1942 on emersed coral reefs of Massawa and Djibouti]. Missione Geologica dell'Azienda Generale Italiana Petroli (AGIP) nella Dancalia Meridionale e sugli Altipiani Hararini (1936-1938) 4(2):446-519
Astrea annuligera	69	22.4167	D. K. Pandey and R. Singh. 2010. Early Pliocene - Holocene Favia from the northern and northwestern coastal areas of Saurashtra Peninsula, western India. Journal of the Palaeontological Society of India 55(2):107-120
Astrea curta	145.333	-15.4167	J. M. Webster and P. J. Davies. 2003. Coral variation in two deep drill cores: significance for the Pleistocene development of the Great Barrier Reef. Sedimentary Geology 159(1-2):61-80
Astrea curta	147.783	-6.31667	J. M. Pandolfi. 1996. Limited membership in Pleistocene reef coral assemblages from the Huon Peninsula, Papua New Guinea: constancy during global change. Paleobiology 22(2):152-176
Astrea curta	147.667	-6.21667	J. M. Pandolfi. 1996. Limited membership in Pleistocene reef coral assemblages from the Huon Peninsula, Papua New Guinea: constancy during global change. Paleobiology 22(2):152-176
Astrea curta	147.6	-6.08333	J. M. Pandolfi. 1996. Limited membership in Pleistocene reef coral assemblages from the Huon Peninsula, Papua New Guinea: constancy during global change. Paleobiology 22(2):152-176
Astrea curta	129.928	28.3214	T. Nakamori. 1986. Community Structures of Recent and Pleistocene Hermatypic Corals in the Ryukyu Islands, Japan. Tohoku University Science Reports, Second Series, Geology 56(2):71-133
Astreopora listeri	147.783	-6.31667	J. M. Pandolfi. 1996. Limited membership in Pleistocene reef coral assemblages from the Huon Peninsula, Papua New Guinea: constancy during global change. Paleobiology 22(2):152-176
Astreopora listeri	147.6	-6.08333	J. M. Pandolfi. 1996. Limited membership in Pleistocene reef coral assemblages from the Huon Peninsula, Papua New Guinea: constancy during global change. Paleobiology 22(2):152-176
Astreopora listeri	39.6667	-4.03333	J. A. Crame. 1981. Ecological stratification in the Pleistocene coral reefs of the Kenya coast. Palaeontology 24(3):609-646
Astreopora listeri	39.7	-4	J. A. Crame. 1980. Succession and diversity in the Pleistocene coral reefs of the Kenya Coast. Palaeontology 23(1):1-37
Astreopora listeri	40.1333	-3.25	J. A. Crame. 1980. Succession and diversity in the Pleistocene coral reefs of the Kenya Coast. Palaeontology 23(1):1-37
Astreopora listeri	39.4667	15.6167	E. Montanaro Gallitelli. 1973. Ricerche eseguite negli anni 1941-1942 sopra i Coralli delle scogliere emerse di Massaua e Gibuti [Research done between 1941 and 1942 on emersed coral reefs of Massawa and Djibouti]. Missione Geologica dell'Azienda Generale Italiana Petroli (AGIP) nella Dancalia Meridionale e sugli Altipiani Hararini (1936-1938) 4(2):446-519
Astreopora myriophthalma	35.4667	27.6833	W-C. Dullo. 1990. Facies, Fossil Record, and Age of Pleistocene Reefs from the Red Sea (Saudi Arabia). Facies 22:1-46
Astreopora myriophthalma	34.5208	28.5553	H. Mewis. 2011. Field work Sinai.
Astreopora myriophthalma	34.5303	28.5664	H. Mewis. 2011. Field work Sinai.
Blastomussa merleti	33.5833	27.65	A. S. El-Sorogy. 2002. Paleontology and depositional environments of the Pleistocene coral reefs of the Gulf of Suez, Egypt. Neues Jahrbuch fÃ¼r Geologie und PalÃ¤ontologie, Abhandlungen 225(3):337-371
Catalaphyllia jardinei	153.367	-29.1	J. Pickett. 1981. A Late Pleistocene coral fauna from Evans Head, N.S.W. Alcheringa 5:71-83
Caulastraea furcata	124.258	24.5042	H. L. Foster. 1965. Geology of Ishigaki-shima Ryukyu-retto. United States Geological Survey Professional Paper 399(A):1-119
Cladocora caespitosa	27.8333	35.9167	J. Titschak, C. S. Nelson, and T. Beck, A. Freiwald, U. Radtke. 2008. Sedimentary evolution of a Late Pleistocene temperate red algal reef (Coralligene) on Rhodes, Greece: correlation with global sea-level fluctuations. Sedimentology 55:1747-1776
Cladocora caespitosa	-0.633333	38.15	C. Zazo, J. L. Goy, and C. J. Dabrio, T. Bardaj, C. Hillaire-Marcel, B. Ghaleb, J.-A. \r\nGonzalez-Delgado, V. Soler. 2001. Pleistocene raised marine terraces of the Spanish Mediterranean and Atlantic coasts: records of coastal uplift, sea-level highstands and climate changes. Marine Geology 194(1-2):103-133
Cladocora caespitosa	9.18333	39.2167	A. Peirano, C. Morri, and C. N. Bianchi, J. Aguirre, F. Antonioli, C. Calzetta, L. Carobene, G. Mastronuzzi, P. Orru. 2004. The Mediterranean coral Cladocora caespitosa: a proxy for past climate fluctuations?. Global and Planetary Change 40:195-200
Cladocora caespitosa	17.25	40.5	A. Peirano, P. Kruzic, and G. Mastronuzzi. 2009. Growth of Mediterranean reef of Cladocora caespitosa (L.) in the Late Quaternary and climate inferences. Facies 55:325-333
Cladocora caespitosa	10.3167	43.8167	A. Peirano, C. Morri, and C. N. Bianchi, J. Aguirre, F. Antonioli, C. Calzetta, L. Carobene, G. Mastronuzzi, P. Orru. 2004. The Mediterranean coral Cladocora caespitosa: a proxy for past climate fluctuations?. Global and Planetary Change 40:195-200
Coelastrea aspera	147.783	-6.31667	J. M. Pandolfi. 1996. Limited membership in Pleistocene reef coral assemblages from the Huon Peninsula, Papua New Guinea: constancy during global change. Paleobiology 22(2):152-176
Coelastrea aspera	147.667	-6.21667	J. M. Pandolfi. 1996. Limited membership in Pleistocene reef coral assemblages from the Huon Peninsula, Papua New Guinea: constancy during global change. Paleobiology 22(2):152-176
Coelastrea aspera	147.6	-6.08333	J. M. Pandolfi. 1996. Limited membership in Pleistocene reef coral assemblages from the Huon Peninsula, Papua New Guinea: constancy during global change. Paleobiology 22(2):152-176
Coelastrea aspera	39.4833	-4.45	J. A. Crame. 1981. Ecological stratification in the Pleistocene coral reefs of the Kenya coast. Palaeontology 24(3):609-646
Coeloseris mayeri	124.533	-8.16667	W. S. Hantoro, P. A. Pirazzoli, and C. Jouannic, C. T. Hoang, U. Radtke, C. Causse, M. Borel Best, R. Lafont, S. Bieda, K. Lambeck. 1994. Quaternary uplifted coral reef terraces on Alor Island, East Indonesia. Coral Reefs 13:215-223
Coeloseris mayeri	147.783	-6.31667	J. M. Pandolfi. 1996. Limited membership in Pleistocene reef coral assemblages from the Huon Peninsula, Papua New Guinea: constancy during global change. Paleobiology 22(2):152-176
Coeloseris mayeri	147.667	-6.21667	J. M. Pandolfi. 1996. Limited membership in Pleistocene reef coral assemblages from the Huon Peninsula, Papua New Guinea: constancy during global change. Paleobiology 22(2):152-176
Coeloseris mayeri	147.6	-6.08333	J. M. Pandolfi. 1996. Limited membership in Pleistocene reef coral assemblages from the Huon Peninsula, Papua New Guinea: constancy during global change. Paleobiology 22(2):152-176
Colpophyllia amaranthus	-69.0833	12.2	J. M. Pandolfi. 2001. Community structure of Pleistocene coral reefs of Curacao, Netherlands Antilles. Ecological Monographs 71(1):49-67
Colpophyllia amaranthus	-69.1333	12.3	J. M. Pandolfi. 2001. Community structure of Pleistocene coral reefs of Curacao, Netherlands Antilles. Ecological Monographs 71(1):49-67
Colpophyllia breviserialis	-69.0167	12.2333	J. M. Pandolfi. 2001. Community structure of Pleistocene coral reefs of Curacao, Netherlands Antilles. Ecological Monographs 71(1):49-67
Colpophyllia breviserialis	-69.1	12.3667	J. M. Pandolfi. 2001. Community structure of Pleistocene coral reefs of Curacao, Netherlands Antilles. Ecological Monographs 71(1):49-67
Colpophyllia breviserialis	-81.7167	12.5	J. M. Pandolfi and J. B. C. Jackson. 2007. Broad-scale patterns in Pleistocene coral reef communities from the Caribbean: implications for ecology and management. In R. B. Aronson (ed.), Geological approaches to coral reef ecology. Ecological Studies 192:201-236
Colpophyllia breviserialis	-81.7	12.5333	J. M. Pandolfi and J. B. C. Jackson. 2007. Broad-scale patterns in Pleistocene coral reef communities from the Caribbean: implications for ecology and management. In R. B. Aronson (ed.), Geological approaches to coral reef ecology. Ecological Studies 192:201-236
Colpophyllia breviserialis	-81.7167	12.5667	J. M. Pandolfi and J. B. C. Jackson. 2007. Broad-scale patterns in Pleistocene coral reef communities from the Caribbean: implications for ecology and management. In R. B. Aronson (ed.), Geological approaches to coral reef ecology. Ecological Studies 192:201-236
Colpophyllia natans	-64.6167	11.85	C. Schubert. 1997. Pleistocene marine terraces of la Blanquilla island, Venezuela, and their diagenesis. Proceedings, Third International Coral Reef Symposium 2:149-154
Colpophyllia natans	-68.9833	12.1333	J. M. Pandolfi. 2001. Community structure of Pleistocene coral reefs of Curacao, Netherlands Antilles. Ecological Monographs 71(1):49-67
Colpophyllia natans	-68.8833	12.1667	J. M. Pandolfi. 2001. Community structure of Pleistocene coral reefs of Curacao, Netherlands Antilles. Ecological Monographs 71(1):49-67
Colpophyllia natans	-69.0667	12.2833	J. M. Pandolfi, G. Llewellyn, and J. B. C. Jackson. 1999. Pleistocene reef environments, constituent grains, and coral community structure: Curacao, Netherlands Antilles. Coral Reefs 18:107-122
Colpophyllia natans	-69.1333	12.3	J. M. Pandolfi. 2001. Community structure of Pleistocene coral reefs of Curacao, Netherlands Antilles. Ecological Monographs 71(1):49-67
Colpophyllia natans	-69.1	12.3667	J. M. Pandolfi. 2001. Community structure of Pleistocene coral reefs of Curacao, Netherlands Antilles. Ecological Monographs 71(1):49-67
Colpophyllia natans	-81.7167	12.5	J. M. Pandolfi and J. B. C. Jackson. 2007. Broad-scale patterns in Pleistocene coral reef communities from the Caribbean: implications for ecology and management. In R. B. Aronson (ed.), Geological approaches to coral reef ecology. Ecological Studies 192:201-236
Colpophyllia natans	-81.7	12.5	J. M. Pandolfi and J. B. C. Jackson. 2007. Broad-scale patterns in Pleistocene coral reef communities from the Caribbean: implications for ecology and management. In R. B. Aronson (ed.), Geological approaches to coral reef ecology. Ecological Studies 192:201-236
Colpophyllia natans	-81.7167	12.5667	J. M. Pandolfi and J. B. C. Jackson. 2007. Broad-scale patterns in Pleistocene coral reef communities from the Caribbean: implications for ecology and management. In R. B. Aronson (ed.), Geological approaches to coral reef ecology. Ecological Studies 192:201-236
Colpophyllia natans	-76.3167	17.8667	S. F. Mitchell, R. K. Pickerill, and T. A. Stemann. 2001. The Port Morant Formation (Upper Pleistocene, Jamaica): high resolution sedimentology and paleoenvironmental analysis of a mixed carbonate clastic lagoonal succession. Sedimentary Geology 144:291-306
Colpophyllia natans	-76.3167	17.8833	S. A. James. 2006. Coral Biodiversity and Zonation on a Pleistocene Reef, Southeastern Jamaica. Jamaica Clearing House Mechanism
Colpophyllia natans	-69.5167	18.4167	J. S. Klaus and A. F. Budd. 2003. Comparison of Caribbean coral reef communities before and after Plio-Pleistocene faunal turnover: Analyses of two Dominican Republic reef sequences. Palaios 18(1):3-21
Colpophyllia natans	-81.3667	19.2667	I. G. Hunter and B. Jones. 1996. Coral associations of the Pleistocene Ironshore Formation, Grand Cayman. Coral Reefs 15(4):249-267
Colpophyllia natans	-81.3833	19.2667	I. G. Hunter and B. Jones. 1996. Coral associations of the Pleistocene Ironshore Formation, Grand Cayman. Coral Reefs 15(4):249-267
Colpophyllia natans	-81.3333	19.2667	I. G. Hunter and B. Jones. 1996. Coral associations of the Pleistocene Ironshore Formation, Grand Cayman. Coral Reefs 15(4):249-267
Colpophyllia natans	-81.3833	19.2833	I. G. Hunter and B. Jones. 1996. Coral associations of the Pleistocene Ironshore Formation, Grand Cayman. Coral Reefs 15(4):249-267
Colpophyllia natans	-81.15	19.2833	I. G. Hunter and B. Jones. 1996. Coral associations of the Pleistocene Ironshore Formation, Grand Cayman. Coral Reefs 15(4):249-267
Colpophyllia natans	-81.3667	19.35	I. G. Hunter and B. Jones. 1996. Coral associations of the Pleistocene Ironshore Formation, Grand Cayman. Coral Reefs 15(4):249-267
Colpophyllia natans	-81.3667	19.3667	I. G. Hunter and B. Jones. 1996. Coral associations of the Pleistocene Ironshore Formation, Grand Cayman. Coral Reefs 15(4):249-267
Colpophyllia natans	-81.3833	19.3667	I. G. Hunter and B. Jones. 1996. Coral associations of the Pleistocene Ironshore Formation, Grand Cayman. Coral Reefs 15(4):249-267
Colpophyllia natans	-81.4	19.3667	I. G. Hunter and B. Jones. 1996. Coral associations of the Pleistocene Ironshore Formation, Grand Cayman. Coral Reefs 15(4):249-267
Colpophyllia natans	-81.3833	19.3833	I. G. Hunter and B. Jones. 1996. Coral associations of the Pleistocene Ironshore Formation, Grand Cayman. Coral Reefs 15(4):249-267
Colpophyllia natans	-87.1208	20.5778	E. JordÃ¡n-Dahlgren. 1997. A Caribbean coral reef community of the Pleistocene. Proceedings of the 8th International Coral Reef Symposium 2:1681-1686
Colpophyllia natans	-81.5667	24.6667	N. E. Weisbord. 1974. Late Cenozoic corals of south Florida. Bulletins of American Paleontology 66(285):259-544
Colpophyllia natans	-80.5833	24.9333	B. J. Greenstein, H. A. Curran, and J. M. Pandolfi. 1998. Shifting ecological baselines and the demise of Acropora cervicornis in the western North Atlantic and Caribbean Province: a Pleistocene perspective. Coral Reefs 17:249-261
Colpophyllia natans	-80.3833	25.1333	B. J. Greenstein, H. A. Curran, and J. M. Pandolfi. 1998. Shifting ecological baselines and the demise of Acropora cervicornis in the western North Atlantic and Caribbean Province: a Pleistocene perspective. Coral Reefs 17:249-261
Colpophyllia natans	-64.7667	32.2667	D. R. Muhs, K. R. Simmons, and B. Steinke. 2002. Timing and warmth of the Last Interglacial period: new U-series evidence from Hawaii and Bermuda and a new fossil compilation for North America. Quaternary Science Reviews 21:1355-1383
Coscinaraea columna	33.5833	27.65	A. S. El-Sorogy. 2002. Paleontology and depositional environments of the Pleistocene coral reefs of the Gulf of Suez, Egypt. Neues Jahrbuch fÃ¼r Geologie und PalÃ¤ontologie, Abhandlungen 225(3):337-371
Coscinaraea monile	35.4667	27.6833	W-C. Dullo. 1990. Facies, Fossil Record, and Age of Pleistocene Reefs from the Red Sea (Saudi Arabia). Facies 22:1-46
Ctenactis echinata	35.4667	27.6833	W-C. Dullo. 1990. Facies, Fossil Record, and Age of Pleistocene Reefs from the Red Sea (Saudi Arabia). Facies 22:1-46
Cycloseris costulata	40	15.15	J. H. Bruggemann, R. T. Buffler, and M. M. M. Guillaume, R. C. Walter, R. v. Cosel, B. N. Ghebretensae, S. M. Berhe. 2004. Stratigraphy, palaeoenvironments and model for the deposition of the Abdur Reef Limestone: context for an important archaeological site from the last interglacial on the Red Sea coast of Eritrea. Palaeogeography, Palaeoclimatology, Palaeoecology 203(3):179-206
Cycloseris costulata	39.4667	15.6167	E. Montanaro Gallitelli. 1973. Ricerche eseguite negli anni 1941-1942 sopra i Coralli delle scogliere emerse di Massaua e Gibuti [Research done between 1941 and 1942 on emersed coral reefs of Massawa and Djibouti]. Missione Geologica dell'Azienda Generale Italiana Petroli (AGIP) nella Dancalia Meridionale e sugli Altipiani Hararini (1936-1938) 4(2):446-519
Cycloseris costulata	35.4667	27.6833	W-C. Dullo. 1990. Facies, Fossil Record, and Age of Pleistocene Reefs from the Red Sea (Saudi Arabia). Facies 22:1-46
Cycloseris cyclolites	40	15.15	J. H. Bruggemann, R. T. Buffler, and M. M. M. Guillaume, R. C. Walter, R. v. Cosel, B. N. Ghebretensae, S. M. Berhe. 2004. Stratigraphy, palaeoenvironments and model for the deposition of the Abdur Reef Limestone: context for an important archaeological site from the last interglacial on the Red Sea coast of Eritrea. Palaeogeography, Palaeoclimatology, Palaeoecology 203(3):179-206
Cycloseris cyclolites	39.4667	15.6167	E. Montanaro Gallitelli. 1973. Ricerche eseguite negli anni 1941-1942 sopra i Coralli delle scogliere emerse di Massaua e Gibuti [Research done between 1941 and 1942 on emersed coral reefs of Massawa and Djibouti]. Missione Geologica dell'Azienda Generale Italiana Petroli (AGIP) nella Dancalia Meridionale e sugli Altipiani Hararini (1936-1938) 4(2):446-519
Cycloseris vaughani	35.4667	27.6833	W-C. Dullo. 1990. Facies, Fossil Record, and Age of Pleistocene Reefs from the Red Sea (Saudi Arabia). Facies 22:1-46
Cynarina lacrymalis	39.4667	15.6167	E. Montanaro Gallitelli. 1973. Ricerche eseguite negli anni 1941-1942 sopra i Coralli delle scogliere emerse di Massaua e Gibuti [Research done between 1941 and 1942 on emersed coral reefs of Massawa and Djibouti]. Missione Geologica dell'Azienda Generale Italiana Petroli (AGIP) nella Dancalia Meridionale e sugli Altipiani Hararini (1936-1938) 4(2):446-519
Cyphastrea microphthalma	147.783	-6.31667	J. M. Pandolfi. 1996. Limited membership in Pleistocene reef coral assemblages from the Huon Peninsula, Papua New Guinea: constancy during global change. Paleobiology 22(2):152-176
Cyphastrea microphthalma	147.667	-6.21667	J. M. Pandolfi. 1996. Limited membership in Pleistocene reef coral assemblages from the Huon Peninsula, Papua New Guinea: constancy during global change. Paleobiology 22(2):152-176
Cyphastrea microphthalma	147.6	-6.08333	J. M. Pandolfi. 1996. Limited membership in Pleistocene reef coral assemblages from the Huon Peninsula, Papua New Guinea: constancy during global change. Paleobiology 22(2):152-176
Cyphastrea microphthalma	39.6667	-4.03333	W. Kiessling, C. Simpson, and B. Beck, J. Pandolfi. 2011. Taxonomic vetting of Pleistocene coral occurrence data.
Cyphastrea microphthalma	33.9111	26.9661	L. R. Casazza. 2012. Symbiosis in the Fossil Record: Eocene Nummulites and Pleistocene Reefs of Egypt.
Cyphastrea microphthalma	35.4667	27.6833	W-C. Dullo. 1990. Facies, Fossil Record, and Age of Pleistocene Reefs from the Red Sea (Saudi Arabia). Facies 22:1-46
Cyphastrea serailia	153.367	-29.1	J. Pickett. 1981. A Late Pleistocene coral fauna from Evans Head, N.S.W. Alcheringa 5:71-83
Cyphastrea serailia	147.783	-6.31667	J. M. Pandolfi. 1996. Limited membership in Pleistocene reef coral assemblages from the Huon Peninsula, Papua New Guinea: constancy during global change. Paleobiology 22(2):152-176
Cyphastrea serailia	147.667	-6.21667	J. M. Pandolfi. 1996. Limited membership in Pleistocene reef coral assemblages from the Huon Peninsula, Papua New Guinea: constancy during global change. Paleobiology 22(2):152-176
Cyphastrea serailia	147.6	-6.08333	J. M. Pandolfi. 1996. Limited membership in Pleistocene reef coral assemblages from the Huon Peninsula, Papua New Guinea: constancy during global change. Paleobiology 22(2):152-176
Cyphastrea serailia	147.567	-6.06667	M. Stein, G. J. Wasserburg, and P. Aharon, J. H. Chen, Z. R. Chu, A. Bloom, J. Chappell. 1993. TIMS U-series dating and stable isotopes of the last interglacial event in Papua New Guinea. Geochimica et Cosmochimica Acta 57:2541-2554
Cyphastrea serailia	43.15	11.6	E. Montanaro Gallitelli. 1973. Ricerche eseguite negli anni 1941-1942 sopra i Coralli delle scogliere emerse di Massaua e Gibuti [Research done between 1941 and 1942 on emersed coral reefs of Massawa and Djibouti]. Missione Geologica dell'Azienda Generale Italiana Petroli (AGIP) nella Dancalia Meridionale e sugli Altipiani Hararini (1936-1938) 4(2):446-519
Cyphastrea serailia	35.4667	27.6833	W-C. Dullo. 1990. Facies, Fossil Record, and Age of Pleistocene Reefs from the Red Sea (Saudi Arabia). Facies 22:1-46
Cyphastrea serailia	34.2253	27.7886	H. Mewis. 2011. Field work Sinai.
Danafungia horrida	39.4667	15.6167	E. Montanaro Gallitelli. 1973. Ricerche eseguite negli anni 1941-1942 sopra i Coralli delle scogliere emerse di Massaua e Gibuti [Research done between 1941 and 1942 on emersed coral reefs of Massawa and Djibouti]. Missione Geologica dell'Azienda Generale Italiana Petroli (AGIP) nella Dancalia Meridionale e sugli Altipiani Hararini (1936-1938) 4(2):446-519
Danafungia horrida	35.4667	27.6833	W-C. Dullo. 1990. Facies, Fossil Record, and Age of Pleistocene Reefs from the Red Sea (Saudi Arabia). Facies 22:1-46
Danafungia horrida	33.5	27.9333	W. Kiessling, C. Simpson, and B. Beck, J. Pandolfi. 2011. Taxonomic vetting of Pleistocene coral occurrence data.
Danafungia scruposa	43.15	11.6	E. Montanaro Gallitelli. 1973. Ricerche eseguite negli anni 1941-1942 sopra i Coralli delle scogliere emerse di Massaua e Gibuti [Research done between 1941 and 1942 on emersed coral reefs of Massawa and Djibouti]. Missione Geologica dell'Azienda Generale Italiana Petroli (AGIP) nella Dancalia Meridionale e sugli Altipiani Hararini (1936-1938) 4(2):446-519
Danafungia scruposa	33.5	27.9333	A. S. El-Sorogy. 2002. Paleontology and depositional environments of the Pleistocene coral reefs of the Gulf of Suez, Egypt. Neues Jahrbuch fÃ¼r Geologie und PalÃ¤ontologie, Abhandlungen 225(3):337-371
Dendrogyra cylindrus	-69.0167	12.2333	J. M. Pandolfi. 2001. Community structure of Pleistocene coral reefs of Curacao, Netherlands Antilles. Ecological Monographs 71(1):49-67
Dendrogyra cylindrus	-69.1333	12.3	J. M. Pandolfi. 2001. Community structure of Pleistocene coral reefs of Curacao, Netherlands Antilles. Ecological Monographs 71(1):49-67
Dendrogyra cylindrus	-69.1	12.3667	J. M. Pandolfi. 2001. Community structure of Pleistocene coral reefs of Curacao, Netherlands Antilles. Ecological Monographs 71(1):49-67
Dendrogyra cylindrus	-81.7167	12.5	J. M. Pandolfi and J. B. C. Jackson. 2007. Broad-scale patterns in Pleistocene coral reef communities from the Caribbean: implications for ecology and management. In R. B. Aronson (ed.), Geological approaches to coral reef ecology. Ecological Studies 192:201-236
Dendrogyra cylindrus	-81.7	12.5	J. M. Pandolfi and J. B. C. Jackson. 2007. Broad-scale patterns in Pleistocene coral reef communities from the Caribbean: implications for ecology and management. In R. B. Aronson (ed.), Geological approaches to coral reef ecology. Ecological Studies 192:201-236
Dendrogyra cylindrus	-69.5167	18.4167	J. S. Klaus and A. F. Budd. 2003. Comparison of Caribbean coral reef communities before and after Plio-Pleistocene faunal turnover: Analyses of two Dominican Republic reef sequences. Palaios 18(1):3-21
Dendrogyra cylindrus	-81.3833	19.2667	I. G. Hunter and B. Jones. 1996. Coral associations of the Pleistocene Ironshore Formation, Grand Cayman. Coral Reefs 15(4):249-267
Dendrogyra cylindrus	-81.3833	19.2833	I. G. Hunter and B. Jones. 1996. Coral associations of the Pleistocene Ironshore Formation, Grand Cayman. Coral Reefs 15(4):249-267
Dendrogyra cylindrus	-81.3667	19.3667	I. G. Hunter and B. Jones. 1996. Coral associations of the Pleistocene Ironshore Formation, Grand Cayman. Coral Reefs 15(4):249-267
Dendrogyra cylindrus	-81.4	19.3667	I. G. Hunter and B. Jones. 1996. Coral associations of the Pleistocene Ironshore Formation, Grand Cayman. Coral Reefs 15(4):249-267
Dendrogyra cylindrus	-81.3833	19.3833	I. G. Hunter and B. Jones. 1996. Coral associations of the Pleistocene Ironshore Formation, Grand Cayman. Coral Reefs 15(4):249-267
Dendrogyra cylindrus	-87.1208	20.5778	E. JordÃ¡n-Dahlgren. 1997. A Caribbean coral reef community of the Pleistocene. Proceedings of the 8th International Coral Reef Symposium 2:1681-1686
Dendrogyra cylindrus	-81.5667	24.6667	N. E. Weisbord. 1974. Late Cenozoic corals of south Florida. Bulletins of American Paleontology 66(285):259-544
Dichocoenia stokesi	-76.3167	17.8667	S. F. Mitchell, R. K. Pickerill, and T. A. Stemann. 2001. The Port Morant Formation (Upper Pleistocene, Jamaica): high resolution sedimentology and paleoenvironmental analysis of a mixed carbonate clastic lagoonal succession. Sedimentary Geology 144:291-306
Dichocoenia stokesi	-76.3167	17.8833	S. A. James. 2006. Coral Biodiversity and Zonation on a Pleistocene Reef, Southeastern Jamaica. Jamaica Clearing House Mechanism
Dichocoenia stokesi	-87.8167	18.1167	W. Kiessling, C. Simpson, and B. Beck, J. Pandolfi. 2011. Taxonomic vetting of Pleistocene coral occurrence data.
Dichocoenia stokesi	-69.5167	18.4167	J. S. Klaus and A. F. Budd. 2003. Comparison of Caribbean coral reef communities before and after Plio-Pleistocene faunal turnover: Analyses of two Dominican Republic reef sequences. Palaios 18(1):3-21
Dichocoenia stokesi	-81.3333	19.2667	I. G. Hunter and B. Jones. 1996. Coral associations of the Pleistocene Ironshore Formation, Grand Cayman. Coral Reefs 15(4):249-267
Dichocoenia stokesi	-81.3333	19.2833	I. G. Hunter and B. Jones. 1996. Coral associations of the Pleistocene Ironshore Formation, Grand Cayman. Coral Reefs 15(4):249-267
Dichocoenia stokesi	-81.3833	19.2833	I. G. Hunter and B. Jones. 1996. Coral associations of the Pleistocene Ironshore Formation, Grand Cayman. Coral Reefs 15(4):249-267
Dichocoenia stokesi	-81.3667	19.35	I. G. Hunter and B. Jones. 1996. Coral associations of the Pleistocene Ironshore Formation, Grand Cayman. Coral Reefs 15(4):249-267
Dichocoenia stokesi	-81.4	19.3667	I. G. Hunter and B. Jones. 1996. Coral associations of the Pleistocene Ironshore Formation, Grand Cayman. Coral Reefs 15(4):249-267
Dichocoenia stokesi	-81.4	19.3833	I. G. Hunter and B. Jones. 1996. Coral associations of the Pleistocene Ironshore Formation, Grand Cayman. Coral Reefs 15(4):249-267
Dichocoenia stokesi	-81.3833	19.3833	I. G. Hunter and B. Jones. 1996. Coral associations of the Pleistocene Ironshore Formation, Grand Cayman. Coral Reefs 15(4):249-267
Dichocoenia stokesi	-87.1208	20.5778	W. Kiessling, C. Simpson, and B. Beck, J. Pandolfi. 2011. Taxonomic vetting of Pleistocene coral occurrence data.
Dichocoenia stokesi	-73.6833	21.0167	A. F. Budd and J. M. Pandolfi. 2004. Overlapping species boundaries and hybridization within the Montastrea "annularis" reef coral complex in the Pleistocene of the Bahama Islands. Paleobiology 30(3):396-425
Dichocoenia stokesi	-74.5333	24.05	A. F. Budd and J. M. Pandolfi. 2004. Overlapping species boundaries and hybridization within the Montastrea "annularis" reef coral complex in the Pleistocene of the Bahama Islands. Paleobiology 30(3):396-425
Dichocoenia stokesi	-81.5667	24.6667	N. E. Weisbord. 1974. Late Cenozoic corals of south Florida. Bulletins of American Paleontology 66(285):259-544
Diploastrea heliopora	120.2	-9.46667	P. A. Pirazzoli, U. Radtke, and W. S. Hantoro, C. Jouannic, C. T. Hoang, C. Causse, M. Borel Best. 1993. A one million-year-long sequence of marine terraces on Sumba Island, Indonesia. Marine Geology 109:221-236
Diploastrea heliopora	147.783	-6.31667	J. M. Pandolfi. 1996. Limited membership in Pleistocene reef coral assemblages from the Huon Peninsula, Papua New Guinea: constancy during global change. Paleobiology 22(2):152-176
Diploastrea heliopora	147.683	-6.25	J. M. Pandolfi. 1996. Limited membership in Pleistocene reef coral assemblages from the Huon Peninsula, Papua New Guinea: constancy during global change. Paleobiology 22(2):152-176
Diploastrea heliopora	147.667	-6.21667	J. M. Pandolfi. 1996. Limited membership in Pleistocene reef coral assemblages from the Huon Peninsula, Papua New Guinea: constancy during global change. Paleobiology 22(2):152-176
Diploastrea heliopora	147.6	-6.08333	J. M. Pandolfi. 1996. Limited membership in Pleistocene reef coral assemblages from the Huon Peninsula, Papua New Guinea: constancy during global change. Paleobiology 22(2):152-176
Diploastrea heliopora	40.1333	-3.25	J. A. Crame. 1980. Succession and diversity in the Pleistocene coral reefs of the Kenya Coast. Palaeontology 23(1):1-37
Diploastrea heliopora	39.4667	15.6167	E. Montanaro Gallitelli. 1973. Ricerche eseguite negli anni 1941-1942 sopra i Coralli delle scogliere emerse di Massaua e Gibuti [Research done between 1941 and 1942 on emersed coral reefs of Massawa and Djibouti]. Missione Geologica dell'Azienda Generale Italiana Petroli (AGIP) nella Dancalia Meridionale e sugli Altipiani Hararini (1936-1938) 4(2):446-519
Diploastrea heliopora	124.258	24.5042	H. L. Foster. 1965. Geology of Ishigaki-shima Ryukyu-retto. United States Geological Survey Professional Paper 399(A):1-119
Diploria labyrinthiformis	-64.6167	11.85	C. Schubert. 1997. Pleistocene marine terraces of la Blanquilla island, Venezuela, and their diagenesis. Proceedings, Third International Coral Reef Symposium 2:149-154
Diploria labyrinthiformis	-68.9833	12.1333	J. M. Pandolfi. 2001. Community structure of Pleistocene coral reefs of Curacao, Netherlands Antilles. Ecological Monographs 71(1):49-67
Diploria labyrinthiformis	-68.8833	12.1667	J. M. Pandolfi. 2001. Community structure of Pleistocene coral reefs of Curacao, Netherlands Antilles. Ecological Monographs 71(1):49-67
Diploria labyrinthiformis	-69.0833	12.2	J. M. Pandolfi. 2001. Community structure of Pleistocene coral reefs of Curacao, Netherlands Antilles. Ecological Monographs 71(1):49-67
Diploria labyrinthiformis	-69.0167	12.2333	J. M. Pandolfi. 2001. Community structure of Pleistocene coral reefs of Curacao, Netherlands Antilles. Ecological Monographs 71(1):49-67
Diploria labyrinthiformis	-69.0667	12.2833	J. M. Pandolfi, G. Llewellyn, and J. B. C. Jackson. 1999. Pleistocene reef environments, constituent grains, and coral community structure: Curacao, Netherlands Antilles. Coral Reefs 18:107-122
Diploria labyrinthiformis	-69.1333	12.3	J. M. Pandolfi. 2001. Community structure of Pleistocene coral reefs of Curacao, Netherlands Antilles. Ecological Monographs 71(1):49-67
Diploria labyrinthiformis	-69.1	12.3667	J. M. Pandolfi. 2001. Community structure of Pleistocene coral reefs of Curacao, Netherlands Antilles. Ecological Monographs 71(1):49-67
Diploria labyrinthiformis	-81.7167	12.5	J. M. Pandolfi and J. B. C. Jackson. 2007. Broad-scale patterns in Pleistocene coral reef communities from the Caribbean: implications for ecology and management. In R. B. Aronson (ed.), Geological approaches to coral reef ecology. Ecological Studies 192:201-236
Diploria labyrinthiformis	-81.7	12.5333	J. M. Pandolfi and J. B. C. Jackson. 2007. Broad-scale patterns in Pleistocene coral reef communities from the Caribbean: implications for ecology and management. In R. B. Aronson (ed.), Geological approaches to coral reef ecology. Ecological Studies 192:201-236
Diploria labyrinthiformis	-81.7167	12.5667	J. M. Pandolfi and J. B. C. Jackson. 2007. Broad-scale patterns in Pleistocene coral reef communities from the Caribbean: implications for ecology and management. In R. B. Aronson (ed.), Geological approaches to coral reef ecology. Ecological Studies 192:201-236
Diploria labyrinthiformis	-64.6	17.75	M. A. Toscano, I. G. Macintyre, and J. Lundberg. 2012. Last interglacial reef limestones, northeastern St. Croix, US Virgin Islands â€” evidence of tectonic tilting and subsidence since MIS 5.5. Coral Reefs 31(1):27-38
Diploria labyrinthiformis	-76.3167	17.8667	S. F. Mitchell, R. K. Pickerill, and T. A. Stemann. 2001. The Port Morant Formation (Upper Pleistocene, Jamaica): high resolution sedimentology and paleoenvironmental analysis of a mixed carbonate clastic lagoonal succession. Sedimentary Geology 144:291-306
Diploria labyrinthiformis	-76.3167	17.8833	S. A. James. 2006. Coral Biodiversity and Zonation on a Pleistocene Reef, Southeastern Jamaica. Jamaica Clearing House Mechanism
Diploria labyrinthiformis	-69.5167	18.4167	J. S. Klaus and A. F. Budd. 2003. Comparison of Caribbean coral reef communities before and after Plio-Pleistocene faunal turnover: Analyses of two Dominican Republic reef sequences. Palaios 18(1):3-21
Diploria labyrinthiformis	-81.3833	19.2667	I. G. Hunter and B. Jones. 1996. Coral associations of the Pleistocene Ironshore Formation, Grand Cayman. Coral Reefs 15(4):249-267
Diploria labyrinthiformis	-81.3333	19.2667	I. G. Hunter and B. Jones. 1996. Coral associations of the Pleistocene Ironshore Formation, Grand Cayman. Coral Reefs 15(4):249-267
Diploria labyrinthiformis	-81.3833	19.2833	I. G. Hunter and B. Jones. 1996. Coral associations of the Pleistocene Ironshore Formation, Grand Cayman. Coral Reefs 15(4):249-267
Diploria labyrinthiformis	-81.3667	19.35	I. G. Hunter and B. Jones. 1996. Coral associations of the Pleistocene Ironshore Formation, Grand Cayman. Coral Reefs 15(4):249-267
Diploria labyrinthiformis	-81.0833	19.35	I. G. Hunter and B. Jones. 1996. Coral associations of the Pleistocene Ironshore Formation, Grand Cayman. Coral Reefs 15(4):249-267
Diploria labyrinthiformis	-81.3667	19.3667	I. G. Hunter and B. Jones. 1996. Coral associations of the Pleistocene Ironshore Formation, Grand Cayman. Coral Reefs 15(4):249-267
Diploria labyrinthiformis	-81.3833	19.3667	I. G. Hunter and B. Jones. 1996. Coral associations of the Pleistocene Ironshore Formation, Grand Cayman. Coral Reefs 15(4):249-267
Diploria labyrinthiformis	-81.4	19.3667	I. G. Hunter and B. Jones. 1996. Coral associations of the Pleistocene Ironshore Formation, Grand Cayman. Coral Reefs 15(4):249-267
Diploria labyrinthiformis	-81.4167	19.3667	I. G. Hunter and B. Jones. 1996. Coral associations of the Pleistocene Ironshore Formation, Grand Cayman. Coral Reefs 15(4):249-267
Diploria labyrinthiformis	-81.3667	19.3833	I. G. Hunter and B. Jones. 1996. Coral associations of the Pleistocene Ironshore Formation, Grand Cayman. Coral Reefs 15(4):249-267
Diploria labyrinthiformis	-81.4	19.3833	I. G. Hunter and B. Jones. 1996. Coral associations of the Pleistocene Ironshore Formation, Grand Cayman. Coral Reefs 15(4):249-267
Diploria labyrinthiformis	-81.3833	19.3833	I. G. Hunter and B. Jones. 1996. Coral associations of the Pleistocene Ironshore Formation, Grand Cayman. Coral Reefs 15(4):249-267
Diploria labyrinthiformis	-80.1	19.65	D. R. Stoddart. 1980. Geology and geomorphology of Little Cayman. Atoll Research Bulletin 241:11-16
Diploria labyrinthiformis	-87.1208	20.5778	E. JordÃ¡n-Dahlgren. 1997. A Caribbean coral reef community of the Pleistocene. Proceedings of the 8th International Coral Reef Symposium 2:1681-1686
Diploria labyrinthiformis	-73.6833	21.0167	A. F. Budd and J. M. Pandolfi. 2004. Overlapping species boundaries and hybridization within the Montastrea "annularis" reef coral complex in the Pleistocene of the Bahama Islands. Paleobiology 30(3):396-425
Diploria labyrinthiformis	-74.5333	24.05	A. F. Budd and J. M. Pandolfi. 2004. Overlapping species boundaries and hybridization within the Montastrea "annularis" reef coral complex in the Pleistocene of the Bahama Islands. Paleobiology 30(3):396-425
Diploria labyrinthiformis	-74.5167	24.0833	A. F. Budd and J. M. Pandolfi. 2004. Overlapping species boundaries and hybridization within the Montastrea "annularis" reef coral complex in the Pleistocene of the Bahama Islands. Paleobiology 30(3):396-425
Diploria labyrinthiformis	-81.5667	24.6667	N. E. Weisbord. 1974. Late Cenozoic corals of south Florida. Bulletins of American Paleontology 66(285):259-544
Diploria labyrinthiformis	-80.5833	24.9333	B. J. Greenstein, H. A. Curran, and J. M. Pandolfi. 1998. Shifting ecological baselines and the demise of Acropora cervicornis in the western North Atlantic and Caribbean Province: a Pleistocene perspective. Coral Reefs 17:249-261
Diploria labyrinthiformis	-77.9333	24.9833	A. F. Budd and J. M. Pandolfi. 2004. Overlapping species boundaries and hybridization within the Montastrea "annularis" reef coral complex in the Pleistocene of the Bahama Islands. Paleobiology 30(3):396-425
Diploria labyrinthiformis	-80.3833	25.1333	B. J. Greenstein, H. A. Curran, and J. M. Pandolfi. 1998. Shifting ecological baselines and the demise of Acropora cervicornis in the western North Atlantic and Caribbean Province: a Pleistocene perspective. Coral Reefs 17:249-261
Dipsastraea favus	145.333	-15.4167	J. M. Webster and P. J. Davies. 2003. Coral variation in two deep drill cores: significance for the Pleistocene development of the Great Barrier Reef. Sedimentary Geology 159(1-2):61-80
Dipsastraea favus	55.8333	-4.35	M. E. Johnson and B. G. Baarli. 2005. Erosion and burial of granite rocky shores in the recent and Late Pleistocene of the Seychelles Islands: physical and biological perspectives. Journal of Coastal Research 21(5):867-879
Dipsastraea favus	43.15	11.6	E. Montanaro Gallitelli. 1973. Ricerche eseguite negli anni 1941-1942 sopra i Coralli delle scogliere emerse di Massaua e Gibuti [Research done between 1941 and 1942 on emersed coral reefs of Massawa and Djibouti]. Missione Geologica dell'Azienda Generale Italiana Petroli (AGIP) nella Dancalia Meridionale e sugli Altipiani Hararini (1936-1938) 4(2):446-519
Dipsastraea favus	39.4667	15.6167	E. Montanaro Gallitelli. 1973. Ricerche eseguite negli anni 1941-1942 sopra i Coralli delle scogliere emerse di Massaua e Gibuti [Research done between 1941 and 1942 on emersed coral reefs of Massawa and Djibouti]. Missione Geologica dell'Azienda Generale Italiana Petroli (AGIP) nella Dancalia Meridionale e sugli Altipiani Hararini (1936-1938) 4(2):446-519
Dipsastraea favus	69	22.4167	D. K. Pandey and R. Singh. 2010. Early Pliocene - Holocene Favia from the northern and northwestern coastal areas of Saurashtra Peninsula, western India. Journal of the Palaeontological Society of India 55(2):107-120
Dipsastraea favus	35.4667	27.6833	W-C. Dullo. 1990. Facies, Fossil Record, and Age of Pleistocene Reefs from the Red Sea (Saudi Arabia). Facies 22:1-46
Dipsastraea laxa	168.254	-17.5817	H. Mewis. 2011. Field work Vanuatu.
Dipsastraea laxa	147.783	-6.31667	J. M. Pandolfi. 1996. Limited membership in Pleistocene reef coral assemblages from the Huon Peninsula, Papua New Guinea: constancy during global change. Paleobiology 22(2):152-176
Dipsastraea laxa	147.683	-6.25	J. M. Pandolfi. 1996. Limited membership in Pleistocene reef coral assemblages from the Huon Peninsula, Papua New Guinea: constancy during global change. Paleobiology 22(2):152-176
Dipsastraea laxa	147.667	-6.21667	J. M. Pandolfi. 1996. Limited membership in Pleistocene reef coral assemblages from the Huon Peninsula, Papua New Guinea: constancy during global change. Paleobiology 22(2):152-176
Dipsastraea laxa	147.6	-6.08333	J. M. Pandolfi. 1996. Limited membership in Pleistocene reef coral assemblages from the Huon Peninsula, Papua New Guinea: constancy during global change. Paleobiology 22(2):152-176
Dipsastraea laxa	38.9333	22.8	A. El-Sorogy, M. Youssef, and M. Al-Sabrouty, N. Al-Otaiby. 2013. Facies pattern and molluscan fauna of the Late Pleistocene raised coral reef of Rabigh area, Red Sea coast, Saudi Arabia.
Dipsastraea laxa	34.25	26.15	A. S. El-Sorogy. 2008. Contributions to the Pleistocene coral reefs of the Red Sea coast, Egypt. Arab Gulf Journal of Scientific Research 26:63-85
Dipsastraea laxa	35.4667	27.6833	W-C. Dullo. 1990. Facies, Fossil Record, and Age of Pleistocene Reefs from the Red Sea (Saudi Arabia). Facies 22:1-46
Dipsastraea matthaii	147.683	-6.25	J. M. Pandolfi. 1996. Limited membership in Pleistocene reef coral assemblages from the Huon Peninsula, Papua New Guinea: constancy during global change. Paleobiology 22(2):152-176
Dipsastraea matthaii	147.667	-6.21667	J. M. Pandolfi. 1996. Limited membership in Pleistocene reef coral assemblages from the Huon Peninsula, Papua New Guinea: constancy during global change. Paleobiology 22(2):152-176
Dipsastraea matthaii	147.6	-6.08333	J. M. Pandolfi. 1996. Limited membership in Pleistocene reef coral assemblages from the Huon Peninsula, Papua New Guinea: constancy during global change. Paleobiology 22(2):152-176
Dipsastraea matthaii	69	22.4167	D. K. Pandey and R. Singh. 2010. Early Pliocene - Holocene Favia from the northern and northwestern coastal areas of Saurashtra Peninsula, western India. Journal of the Palaeontological Society of India 55(2):107-120
Dipsastraea pallida	153.367	-29.1	J. Pickett. 1981. A Late Pleistocene coral fauna from Evans Head, N.S.W. Alcheringa 5:71-83
Dipsastraea pallida	167.417	-22.55	J. Launay. 1985. Paleoniveaux marins et neotectonique a l'Ile des Pins (Nouvelle-Caledonie) [Marine paleolevels and neotectonics at Ile des Pins (New Caledonia)]. Geologie de la France 1:77-81
Dipsastraea pallida	147.783	-6.31667	J. M. Pandolfi. 1996. Limited membership in Pleistocene reef coral assemblages from the Huon Peninsula, Papua New Guinea: constancy during global change. Paleobiology 22(2):152-176
Dipsastraea pallida	147.683	-6.25	J. M. Pandolfi. 1996. Limited membership in Pleistocene reef coral assemblages from the Huon Peninsula, Papua New Guinea: constancy during global change. Paleobiology 22(2):152-176
Dipsastraea pallida	147.667	-6.21667	J. M. Pandolfi. 1996. Limited membership in Pleistocene reef coral assemblages from the Huon Peninsula, Papua New Guinea: constancy during global change. Paleobiology 22(2):152-176
Dipsastraea pallida	147.583	-6.11667	M. Stein, G. J. Wasserburg, and P. Aharon, J. H. Chen, Z. R. Chu, A. Bloom, J. Chappell. 1993. TIMS U-series dating and stable isotopes of the last interglacial event in Papua New Guinea. Geochimica et Cosmochimica Acta 57:2541-2554
Dipsastraea pallida	147.6	-6.08333	J. M. Pandolfi. 1996. Limited membership in Pleistocene reef coral assemblages from the Huon Peninsula, Papua New Guinea: constancy during global change. Paleobiology 22(2):152-176
Dipsastraea pallida	43.15	11.6	E. Montanaro Gallitelli. 1973. Ricerche eseguite negli anni 1941-1942 sopra i Coralli delle scogliere emerse di Massaua e Gibuti [Research done between 1941 and 1942 on emersed coral reefs of Massawa and Djibouti]. Missione Geologica dell'Azienda Generale Italiana Petroli (AGIP) nella Dancalia Meridionale e sugli Altipiani Hararini (1936-1938) 4(2):446-519
Dipsastraea pallida	43.4	12.0667	H. Faure, C. T. Hoang, and C. Lalou. 1980. Datations 230Th/234U des calcaires coralliens et mouvements verticaux a Djibouti [230Th/234U dating of coral limestones and vertical uplift at Djibouti]. Bulletin de la Societe Geologique de France 22(6):959-962
Dipsastraea pallida	38.9333	22.8	A. El-Sorogy, M. Youssef, and M. Al-Sabrouty, N. Al-Otaiby. 2013. Facies pattern and molluscan fauna of the Late Pleistocene raised coral reef of Rabigh area, Red Sea coast, Saudi Arabia.
Dipsastraea pallida	124.221	24.4542	H. L. Foster. 1965. Geology of Ishigaki-shima Ryukyu-retto. United States Geological Survey Professional Paper 399(A):1-119
Dipsastraea pallida	34.25	26.15	A. S. El-Sorogy. 2008. Contributions to the Pleistocene coral reefs of the Red Sea coast, Egypt. Arab Gulf Journal of Scientific Research 26:63-85
Dipsastraea pallida	33.9111	26.9661	L. R. Casazza. 2012. Symbiosis in the Fossil Record: Eocene Nummulites and Pleistocene Reefs of Egypt.
Dipsastraea pallida	35.4667	27.6833	W-C. Dullo. 1990. Facies, Fossil Record, and Age of Pleistocene Reefs from the Red Sea (Saudi Arabia). Facies 22:1-46
Dipsastraea pallida	129.928	28.3214	T. Nakamori. 1986. Community Structures of Recent and Pleistocene Hermatypic Corals in the Ryukyu Islands, Japan. Tohoku University Science Reports, Second Series, Geology 56(2):71-133
Dipsastraea pallida	34.5303	28.5664	H. Mewis. 2011. Field work Sinai.
Dipsastraea speciosa	39.4667	15.6167	E. Montanaro Gallitelli. 1973. Ricerche eseguite negli anni 1941-1942 sopra i Coralli delle scogliere emerse di Massaua e Gibuti [Research done between 1941 and 1942 on emersed coral reefs of Massawa and Djibouti]. Missione Geologica dell'Azienda Generale Italiana Petroli (AGIP) nella Dancalia Meridionale e sugli Altipiani Hararini (1936-1938) 4(2):446-519
Dipsastraea speciosa	38.9333	22.8	A. El-Sorogy, M. Youssef, and M. Al-Sabrouty, N. Al-Otaiby. 2013. Facies pattern and molluscan fauna of the Late Pleistocene raised coral reef of Rabigh area, Red Sea coast, Saudi Arabia.
Dipsastraea speciosa	34.25	26.15	A. S. El-Sorogy. 1997. Progressive diagenetic sequence from Pleistocene coral reefs in the area between Quseir and Mersa Alam, Red Sea coast, Egypt. Egyptian journal of geology 41(1):519-540
Dipsastraea speciosa	34.035	26.555	L. R. Casazza. 2012. Symbiosis in the Fossil Record: Eocene Nummulites and Pleistocene Reefs of Egypt.
Dipsastraea speciosa	35.4667	27.6833	W-C. Dullo. 1990. Facies, Fossil Record, and Age of Pleistocene Reefs from the Red Sea (Saudi Arabia). Facies 22:1-46
Echinophyllia aspera	39.4667	15.6167	E. Montanaro Gallitelli. 1973. Ricerche eseguite negli anni 1941-1942 sopra i Coralli delle scogliere emerse di Massaua e Gibuti [Research done between 1941 and 1942 on emersed coral reefs of Massawa and Djibouti]. Missione Geologica dell'Azienda Generale Italiana Petroli (AGIP) nella Dancalia Meridionale e sugli Altipiani Hararini (1936-1938) 4(2):446-519
Echinophyllia aspera	35.4667	27.6833	W-C. Dullo. 1990. Facies, Fossil Record, and Age of Pleistocene Reefs from the Red Sea (Saudi Arabia). Facies 22:1-46
Echinopora forskaliana	34.2386	27.7869	H. Mewis. 2011. Field work Sinai.
Echinopora forskaliana	34.2253	27.7889	H. Mewis. 2011. Field work Sinai.
Echinopora forskaliana	34.2319	27.7956	H. Mewis. 2011. Field work Sinai.
Echinopora forskaliana	34.5208	28.5553	H. Mewis. 2011. Field work Sinai.
Echinopora gemmacea	39.4833	-4.45	J. A. Crame. 1981. Ecological stratification in the Pleistocene coral reefs of the Kenya coast. Palaeontology 24(3):609-646
Echinopora gemmacea	39.5833	-4.28333	J. A. Crame. 1981. Ecological stratification in the Pleistocene coral reefs of the Kenya coast. Palaeontology 24(3):609-646
Echinopora gemmacea	39.4667	15.6167	E. Montanaro Gallitelli. 1973. Ricerche eseguite negli anni 1941-1942 sopra i Coralli delle scogliere emerse di Massaua e Gibuti [Research done between 1941 and 1942 on emersed coral reefs of Massawa and Djibouti]. Missione Geologica dell'Azienda Generale Italiana Petroli (AGIP) nella Dancalia Meridionale e sugli Altipiani Hararini (1936-1938) 4(2):446-519
Echinopora gemmacea	33.9111	26.9661	L. R. Casazza. 2012. Symbiosis in the Fossil Record: Eocene Nummulites and Pleistocene Reefs of Egypt.
Echinopora gemmacea	35.4667	27.6833	W-C. Dullo. 1990. Facies, Fossil Record, and Age of Pleistocene Reefs from the Red Sea (Saudi Arabia). Facies 22:1-46
Echinopora gemmacea	34.2253	27.7886	H. Mewis. 2011. Field work Sinai.
Echinopora gemmacea	34.2319	27.7956	H. Mewis. 2011. Field work Sinai.
Echinopora gemmacea	34.5208	28.5553	H. Mewis. 2011. Field work Sinai.
Echinopora gemmacea	34.5211	28.5556	H. Mewis. 2011. Field work Sinai.
Echinopora gemmacea	34.5303	28.5664	H. Mewis. 2011. Field work Sinai.
Echinopora gemmacea	34.5339	28.5681	H. Mewis. 2011. Field work Sinai.
Echinopora lamellosa	43.15	11.6	E. Montanaro Gallitelli. 1973. Ricerche eseguite negli anni 1941-1942 sopra i Coralli delle scogliere emerse di Massaua e Gibuti [Research done between 1941 and 1942 on emersed coral reefs of Massawa and Djibouti]. Missione Geologica dell'Azienda Generale Italiana Petroli (AGIP) nella Dancalia Meridionale e sugli Altipiani Hararini (1936-1938) 4(2):446-519
Echinopora lamellosa	34.035	26.555	L. R. Casazza. 2012. Symbiosis in the Fossil Record: Eocene Nummulites and Pleistocene Reefs of Egypt.
Echinopora lamellosa	33.5833	27.65	A. S. El-Sorogy. 2002. Paleontology and depositional environments of the Pleistocene coral reefs of the Gulf of Suez, Egypt. Neues Jahrbuch fÃ¼r Geologie und PalÃ¤ontologie, Abhandlungen 225(3):337-371
Echinopora lamellosa	35.4667	27.6833	W-C. Dullo. 1990. Facies, Fossil Record, and Age of Pleistocene Reefs from the Red Sea (Saudi Arabia). Facies 22:1-46
Eusmilia fastigiata	-81.7167	12.5	J. M. Pandolfi and J. B. C. Jackson. 2007. Broad-scale patterns in Pleistocene coral reef communities from the Caribbean: implications for ecology and management. In R. B. Aronson (ed.), Geological approaches to coral reef ecology. Ecological Studies 192:201-236
Eusmilia fastigiata	-76.3167	17.8667	S. F. Mitchell, R. K. Pickerill, and T. A. Stemann. 2001. The Port Morant Formation (Upper Pleistocene, Jamaica): high resolution sedimentology and paleoenvironmental analysis of a mixed carbonate clastic lagoonal succession. Sedimentary Geology 144:291-306
Eusmilia fastigiata	-87.9	18	S. J. Mazzullo. 2006. Late Pliocene to Holocene platform evolution in northern Belize, and comparison with coeval deposits in southern Belize and the Bahamas. Sedimentology 53:1015-1047
Eusmilia fastigiata	-81.3333	19.2833	I. G. Hunter and B. Jones. 1996. Coral associations of the Pleistocene Ironshore Formation, Grand Cayman. Coral Reefs 15(4):249-267
Eusmilia fastigiata	-81.3667	19.35	I. G. Hunter and B. Jones. 1996. Coral associations of the Pleistocene Ironshore Formation, Grand Cayman. Coral Reefs 15(4):249-267
Eusmilia fastigiata	-81.3667	19.3667	I. G. Hunter and B. Jones. 1996. Coral associations of the Pleistocene Ironshore Formation, Grand Cayman. Coral Reefs 15(4):249-267
Eusmilia fastigiata	-81.3833	19.3667	I. G. Hunter and B. Jones. 1996. Coral associations of the Pleistocene Ironshore Formation, Grand Cayman. Coral Reefs 15(4):249-267
Eusmilia fastigiata	-81.4	19.3833	I. G. Hunter and B. Jones. 1996. Coral associations of the Pleistocene Ironshore Formation, Grand Cayman. Coral Reefs 15(4):249-267
Eusmilia fastigiata	-81.3833	19.3833	I. G. Hunter and B. Jones. 1996. Coral associations of the Pleistocene Ironshore Formation, Grand Cayman. Coral Reefs 15(4):249-267
Eusmilia fastigiata	-87.1208	20.5778	E. JordÃ¡n-Dahlgren. 1997. A Caribbean coral reef community of the Pleistocene. Proceedings of the 8th International Coral Reef Symposium 2:1681-1686
Eusmilia fastigiata	-81.5667	24.6667	N. E. Weisbord. 1974. Late Cenozoic corals of south Florida. Bulletins of American Paleontology 66(285):259-544
Eusmilia fastigiata	-77.9333	24.9833	A. F. Budd and J. M. Pandolfi. 2004. Overlapping species boundaries and hybridization within the Montastrea "annularis" reef coral complex in the Pleistocene of the Bahama Islands. Paleobiology 30(3):396-425
Favia fragum	-68.9833	12.1333	J. M. Pandolfi. 2001. Community structure of Pleistocene coral reefs of Curacao, Netherlands Antilles. Ecological Monographs 71(1):49-67
Favia fragum	-68.8833	12.1667	J. M. Pandolfi. 2001. Community structure of Pleistocene coral reefs of Curacao, Netherlands Antilles. Ecological Monographs 71(1):49-67
Favia fragum	-69.0833	12.2	J. M. Pandolfi. 2001. Community structure of Pleistocene coral reefs of Curacao, Netherlands Antilles. Ecological Monographs 71(1):49-67
Favia fragum	-69.0167	12.2333	J. M. Pandolfi. 2001. Community structure of Pleistocene coral reefs of Curacao, Netherlands Antilles. Ecological Monographs 71(1):49-67
Favia fragum	-69.0667	12.2833	J. M. Pandolfi, G. Llewellyn, and J. B. C. Jackson. 1999. Pleistocene reef environments, constituent grains, and coral community structure: Curacao, Netherlands Antilles. Coral Reefs 18:107-122
Favia fragum	-69.1333	12.3	J. M. Pandolfi. 2001. Community structure of Pleistocene coral reefs of Curacao, Netherlands Antilles. Ecological Monographs 71(1):49-67
Favia fragum	-76.3167	17.8667	S. F. Mitchell, R. K. Pickerill, and T. A. Stemann. 2001. The Port Morant Formation (Upper Pleistocene, Jamaica): high resolution sedimentology and paleoenvironmental analysis of a mixed carbonate clastic lagoonal succession. Sedimentary Geology 144:291-306
Favia fragum	-69.5167	18.4167	J. S. Klaus and A. F. Budd. 2003. Comparison of Caribbean coral reef communities before and after Plio-Pleistocene faunal turnover: Analyses of two Dominican Republic reef sequences. Palaios 18(1):3-21
Favia fragum	-81.3667	19.2667	I. G. Hunter and B. Jones. 1996. Coral associations of the Pleistocene Ironshore Formation, Grand Cayman. Coral Reefs 15(4):249-267
Favia fragum	-81.3833	19.2667	I. G. Hunter and B. Jones. 1996. Coral associations of the Pleistocene Ironshore Formation, Grand Cayman. Coral Reefs 15(4):249-267
Favia fragum	-81.3333	19.2833	I. G. Hunter and B. Jones. 1996. Coral associations of the Pleistocene Ironshore Formation, Grand Cayman. Coral Reefs 15(4):249-267
Favia fragum	-81.3833	19.2833	I. G. Hunter and B. Jones. 1996. Coral associations of the Pleistocene Ironshore Formation, Grand Cayman. Coral Reefs 15(4):249-267
Favia fragum	-81.15	19.2833	I. G. Hunter and B. Jones. 1996. Coral associations of the Pleistocene Ironshore Formation, Grand Cayman. Coral Reefs 15(4):249-267
Favia fragum	-81.3667	19.3	I. G. Hunter and B. Jones. 1996. Coral associations of the Pleistocene Ironshore Formation, Grand Cayman. Coral Reefs 15(4):249-267
Favia fragum	-81.3667	19.35	I. G. Hunter and B. Jones. 1996. Coral associations of the Pleistocene Ironshore Formation, Grand Cayman. Coral Reefs 15(4):249-267
Favia fragum	-81.3667	19.3667	I. G. Hunter and B. Jones. 1996. Coral associations of the Pleistocene Ironshore Formation, Grand Cayman. Coral Reefs 15(4):249-267
Favia fragum	-81.3833	19.3667	I. G. Hunter and B. Jones. 1996. Coral associations of the Pleistocene Ironshore Formation, Grand Cayman. Coral Reefs 15(4):249-267
Favia fragum	-81.4	19.3667	I. G. Hunter and B. Jones. 1996. Coral associations of the Pleistocene Ironshore Formation, Grand Cayman. Coral Reefs 15(4):249-267
Favia fragum	-81.4167	19.3667	I. G. Hunter and B. Jones. 1996. Coral associations of the Pleistocene Ironshore Formation, Grand Cayman. Coral Reefs 15(4):249-267
Favia fragum	-81.3667	19.3833	I. G. Hunter and B. Jones. 1996. Coral associations of the Pleistocene Ironshore Formation, Grand Cayman. Coral Reefs 15(4):249-267
Favia fragum	-81.4	19.3833	I. G. Hunter and B. Jones. 1996. Coral associations of the Pleistocene Ironshore Formation, Grand Cayman. Coral Reefs 15(4):249-267
Favia fragum	-81.3833	19.3833	I. G. Hunter and B. Jones. 1996. Coral associations of the Pleistocene Ironshore Formation, Grand Cayman. Coral Reefs 15(4):249-267
Favia fragum	-87.1208	20.5778	E. JordÃ¡n-Dahlgren. 1997. A Caribbean coral reef community of the Pleistocene. Proceedings of the 8th International Coral Reef Symposium 2:1681-1686
Favia fragum	-73.6833	21.0167	A. F. Budd and J. M. Pandolfi. 2004. Overlapping species boundaries and hybridization within the Montastrea "annularis" reef coral complex in the Pleistocene of the Bahama Islands. Paleobiology 30(3):396-425
Favia fragum	-74.55	23.95	D. E. Hattin and V. L. Warren. 1989. Stratigraphic analysis of a fossil Neogoniolithon-capped patch reef and associated facies, San Salvador, Bahamas. Coral Reefs (8):19-30
Favia fragum	-81.5667	24.6667	N. E. Weisbord. 1974. Late Cenozoic corals of south Florida. Bulletins of American Paleontology 66(285):259-544
Favia fragum	-80.5833	24.9333	B. J. Greenstein, H. A. Curran, and J. M. Pandolfi. 1998. Shifting ecological baselines and the demise of Acropora cervicornis in the western North Atlantic and Caribbean Province: a Pleistocene perspective. Coral Reefs 17:249-261
Favia fragum	-80.3833	25.1333	B. J. Greenstein, H. A. Curran, and J. M. Pandolfi. 1998. Shifting ecological baselines and the demise of Acropora cervicornis in the western North Atlantic and Caribbean Province: a Pleistocene perspective. Coral Reefs 17:249-261
Favites abdita	153.367	-29.1	J. Pickett. 1981. A Late Pleistocene coral fauna from Evans Head, N.S.W. Alcheringa 5:71-83
Favites abdita	57.5	-20.3333	L. F. Montaggioni. 1982. Pleistocene marine depositional environments from Mauritius island, Indian Ocean. Geobios 15(2):161-179
Favites abdita	147.683	-6.25	J. M. Pandolfi. 1996. Limited membership in Pleistocene reef coral assemblages from the Huon Peninsula, Papua New Guinea: constancy during global change. Paleobiology 22(2):152-176
Favites abdita	43.4	12.0667	H. Faure, C. T. Hoang, and C. Lalou. 1980. Datations 230Th/234U des calcaires coralliens et mouvements verticaux a Djibouti [230Th/234U dating of coral limestones and vertical uplift at Djibouti]. Bulletin de la Societe Geologique de France 22(6):959-962
Favites abdita	39.4667	15.6167	E. Montanaro Gallitelli. 1973. Ricerche eseguite negli anni 1941-1942 sopra i Coralli delle scogliere emerse di Massaua e Gibuti [Research done between 1941 and 1942 on emersed coral reefs of Massawa and Djibouti]. Missione Geologica dell'Azienda Generale Italiana Petroli (AGIP) nella Dancalia Meridionale e sugli Altipiani Hararini (1936-1938) 4(2):446-519
Favites abdita	124.221	24.4542	H. L. Foster. 1965. Geology of Ishigaki-shima Ryukyu-retto. United States Geological Survey Professional Paper 399(A):1-119
Favites abdita	35.4667	27.6833	W-C. Dullo. 1990. Facies, Fossil Record, and Age of Pleistocene Reefs from the Red Sea (Saudi Arabia). Facies 22:1-46
Favites acuticollis	69	22.4167	D. K. Pandey and R. Singh. 2010. Early Pliocene - Holocene Favia from the northern and northwestern coastal areas of Saurashtra Peninsula, western India. Journal of the Palaeontological Society of India 55(2):107-120
Favites chinensis	124.533	-8.16667	W. S. Hantoro, P. A. Pirazzoli, and C. Jouannic, C. T. Hoang, U. Radtke, C. Causse, M. Borel Best, R. Lafont, S. Bieda, K. Lambeck. 1994. Quaternary uplifted coral reef terraces on Alor Island, East Indonesia. Coral Reefs 13:215-223
Favites chinensis	147.783	-6.31667	J. M. Pandolfi. 1996. Limited membership in Pleistocene reef coral assemblages from the Huon Peninsula, Papua New Guinea: constancy during global change. Paleobiology 22(2):152-176
Favites chinensis	147.667	-6.21667	J. M. Pandolfi. 1996. Limited membership in Pleistocene reef coral assemblages from the Huon Peninsula, Papua New Guinea: constancy during global change. Paleobiology 22(2):152-176
Favites chinensis	147.6	-6.08333	J. M. Pandolfi. 1996. Limited membership in Pleistocene reef coral assemblages from the Huon Peninsula, Papua New Guinea: constancy during global change. Paleobiology 22(2):152-176
Favites chinensis	40	15.15	J. H. Bruggemann, R. T. Buffler, and M. M. M. Guillaume, R. C. Walter, R. v. Cosel, B. N. Ghebretensae, S. M. Berhe. 2004. Stratigraphy, palaeoenvironments and model for the deposition of the Abdur Reef Limestone: context for an important archaeological site from the last interglacial on the Red Sea coast of Eritrea. Palaeogeography, Palaeoclimatology, Palaeoecology 203(3):179-206
Favites complanata	147.783	-6.31667	J. M. Pandolfi. 1996. Limited membership in Pleistocene reef coral assemblages from the Huon Peninsula, Papua New Guinea: constancy during global change. Paleobiology 22(2):152-176
Favites complanata	147.6	-6.08333	J. M. Pandolfi. 1996. Limited membership in Pleistocene reef coral assemblages from the Huon Peninsula, Papua New Guinea: constancy during global change. Paleobiology 22(2):152-176
Favites complanata	35.4667	27.6833	W-C. Dullo. 1990. Facies, Fossil Record, and Age of Pleistocene Reefs from the Red Sea (Saudi Arabia). Facies 22:1-46
Favites flexuosa	120.2	-9.46667	P. A. Pirazzoli, U. Radtke, and W. S. Hantoro, C. Jouannic, C. T. Hoang, C. Causse, M. Borel Best. 1993. A one million-year-long sequence of marine terraces on Sumba Island, Indonesia. Marine Geology 109:221-236
Favites flexuosa	34.25	26.15	A. S. El-Sorogy. 1997. Progressive diagenetic sequence from Pleistocene coral reefs in the area between Quseir and Mersa Alam, Red Sea coast, Egypt. Egyptian journal of geology 41(1):519-540
Favites flexuosa	35.4667	27.6833	W-C. Dullo. 1990. Facies, Fossil Record, and Age of Pleistocene Reefs from the Red Sea (Saudi Arabia). Facies 22:1-46
Favites flexuosa	34.2253	27.7886	H. Mewis. 2011. Field work Sinai.
Favites flexuosa	34.2253	27.7889	H. Mewis. 2011. Field work Sinai.
Favites halicora	113.733	-28.4167	B. J. Greenstein and J. M. Pandolfi. 2008. Escaping the heat: range shifts of reef coral taxa in coastal Western Australia. Global Change Biology 14:513-528
Favites halicora	69	22.4167	D. K. Pandey and R. Singh. 2010. Early Pliocene - Holocene Favia from the northern and northwestern coastal areas of Saurashtra Peninsula, western India. Journal of the Palaeontological Society of India 55(2):107-120
Favites pentagona	147.783	-6.31667	J. M. Pandolfi. 1996. Limited membership in Pleistocene reef coral assemblages from the Huon Peninsula, Papua New Guinea: constancy during global change. Paleobiology 22(2):152-176
Favites pentagona	147.6	-6.08333	J. M. Pandolfi. 1996. Limited membership in Pleistocene reef coral assemblages from the Huon Peninsula, Papua New Guinea: constancy during global change. Paleobiology 22(2):152-176
Favites pentagona	40	15.15	J. H. Bruggemann, R. T. Buffler, and M. M. M. Guillaume, R. C. Walter, R. v. Cosel, B. N. Ghebretensae, S. M. Berhe. 2004. Stratigraphy, palaeoenvironments and model for the deposition of the Abdur Reef Limestone: context for an important archaeological site from the last interglacial on the Red Sea coast of Eritrea. Palaeogeography, Palaeoclimatology, Palaeoecology 203(3):179-206
Favites pentagona	34.4847	25.7856	L. R. Casazza. 2012. Symbiosis in the Fossil Record: Eocene Nummulites and Pleistocene Reefs of Egypt.
Favites pentagona	34.035	26.555	L. R. Casazza. 2012. Symbiosis in the Fossil Record: Eocene Nummulites and Pleistocene Reefs of Egypt.
Favites pentagona	33.9111	26.9661	L. R. Casazza. 2012. Symbiosis in the Fossil Record: Eocene Nummulites and Pleistocene Reefs of Egypt.
Favites pentagona	35.4667	27.6833	W-C. Dullo. 1990. Facies, Fossil Record, and Age of Pleistocene Reefs from the Red Sea (Saudi Arabia). Facies 22:1-46
Favites pentagona	33.5	27.9333	A. S. El-Sorogy. 2002. Paleontology and depositional environments of the Pleistocene coral reefs of the Gulf of Suez, Egypt. Neues Jahrbuch fÃ¼r Geologie und PalÃ¤ontologie, Abhandlungen 225(3):337-371
Favites pentagona	34.5208	28.5553	H. Mewis. 2011. Field work Sinai.
Favites pentagona	34.5303	28.5664	H. Mewis. 2011. Field work Sinai.
Favites valenciennesi	147.783	-6.31667	J. M. Pandolfi. 1996. Limited membership in Pleistocene reef coral assemblages from the Huon Peninsula, Papua New Guinea: constancy during global change. Paleobiology 22(2):152-176
Favites valenciennesi	147.6	-6.08333	J. M. Pandolfi. 1996. Limited membership in Pleistocene reef coral assemblages from the Huon Peninsula, Papua New Guinea: constancy during global change. Paleobiology 22(2):152-176
Fungia fungites	153.367	-29.1	J. Pickett. 1981. A Late Pleistocene coral fauna from Evans Head, N.S.W. Alcheringa 5:71-83
Fungia fungites	43.15	11.6	E. Montanaro Gallitelli. 1973. Ricerche eseguite negli anni 1941-1942 sopra i Coralli delle scogliere emerse di Massaua e Gibuti [Research done between 1941 and 1942 on emersed coral reefs of Massawa and Djibouti]. Missione Geologica dell'Azienda Generale Italiana Petroli (AGIP) nella Dancalia Meridionale e sugli Altipiani Hararini (1936-1938) 4(2):446-519
Fungia fungites	39.4667	15.6167	E. Montanaro Gallitelli. 1973. Ricerche eseguite negli anni 1941-1942 sopra i Coralli delle scogliere emerse di Massaua e Gibuti [Research done between 1941 and 1942 on emersed coral reefs of Massawa and Djibouti]. Missione Geologica dell'Azienda Generale Italiana Petroli (AGIP) nella Dancalia Meridionale e sugli Altipiani Hararini (1936-1938) 4(2):446-519
Fungia fungites	38.9333	22.8	A. El-Sorogy, M. Youssef, and M. Al-Sabrouty, N. Al-Otaiby. 2013. Facies pattern and molluscan fauna of the Late Pleistocene raised coral reef of Rabigh area, Red Sea coast, Saudi Arabia.
Fungia fungites	33.5	27.9333	A. S. El-Sorogy. 2002. Paleontology and depositional environments of the Pleistocene coral reefs of the Gulf of Suez, Egypt. Neues Jahrbuch fÃ¼r Geologie und PalÃ¤ontologie, Abhandlungen 225(3):337-371
Galaxea astreata	115.417	-20.8333	K.J. McNamara and G.W. Kendrick. 1994. Cenozoic Molluscs and Echinoids of Barrow Island, Western Australia. Records of the Western Australian Museum Supplement 51
Galaxea astreata	115.333	-20.8333	K.J. McNamara and G.W. Kendrick. 1994. Cenozoic Molluscs and Echinoids of Barrow Island, Western Australia. Records of the Western Australian Museum Supplement 51
Galaxea astreata	168.255	-17.5789	H. Mewis. 2011. Field work Vanuatu.
Galaxea astreata	168.255	-17.5758	H. Mewis. 2011. Field work Vanuatu.
Galaxea astreata	39.4833	-4.45	J. A. Crame. 1981. Ecological stratification in the Pleistocene coral reefs of the Kenya coast. Palaeontology 24(3):609-646
Galaxea astreata	39.5833	-4.28333	J. A. Crame. 1981. Ecological stratification in the Pleistocene coral reefs of the Kenya coast. Palaeontology 24(3):609-646
Galaxea astreata	124.258	24.5042	H. L. Foster. 1965. Geology of Ishigaki-shima Ryukyu-retto. United States Geological Survey Professional Paper 399(A):1-119
Galaxea astreata	35.4667	27.6833	W-C. Dullo. 1990. Facies, Fossil Record, and Age of Pleistocene Reefs from the Red Sea (Saudi Arabia). Facies 22:1-46
Galaxea fascicularis	115.333	-20.8333	K.J. McNamara and G.W. Kendrick. 1994. Cenozoic Molluscs and Echinoids of Barrow Island, Western Australia. Records of the Western Australian Museum Supplement 51
Galaxea fascicularis	39.5833	-4.28333	J. A. Crame. 1981. Ecological stratification in the Pleistocene coral reefs of the Kenya coast. Palaeontology 24(3):609-646
Galaxea fascicularis	39.6833	-4.05	J. A. Crame. 1980. Succession and diversity in the Pleistocene coral reefs of the Kenya Coast. Palaeontology 23(1):1-37
Galaxea fascicularis	39.6667	-4.03333	W. Kiessling, C. Simpson, and B. Beck, J. Pandolfi. 2011. Taxonomic vetting of Pleistocene coral occurrence data.
Galaxea fascicularis	39.7	-4	J. A. Crame. 1980. Succession and diversity in the Pleistocene coral reefs of the Kenya Coast. Palaeontology 23(1):1-37
Galaxea fascicularis	40.1333	-3.25	J. A. Crame. 1980. Succession and diversity in the Pleistocene coral reefs of the Kenya Coast. Palaeontology 23(1):1-37
Galaxea fascicularis	43.15	11.6	E. Montanaro Gallitelli. 1973. Ricerche eseguite negli anni 1941-1942 sopra i Coralli delle scogliere emerse di Massaua e Gibuti [Research done between 1941 and 1942 on emersed coral reefs of Massawa and Djibouti]. Missione Geologica dell'Azienda Generale Italiana Petroli (AGIP) nella Dancalia Meridionale e sugli Altipiani Hararini (1936-1938) 4(2):446-519
Galaxea fascicularis	38.9333	22.8	A. El-Sorogy, M. Youssef, and M. Al-Sabrouty, N. Al-Otaiby. 2013. Facies pattern and molluscan fauna of the Late Pleistocene raised coral reef of Rabigh area, Red Sea coast, Saudi Arabia.
Galaxea fascicularis	34.4847	25.7856	L. R. Casazza. 2012. Symbiosis in the Fossil Record: Eocene Nummulites and Pleistocene Reefs of Egypt.
Galaxea fascicularis	34.25	26.15	A. S. El-Sorogy. 2008. Contributions to the Pleistocene coral reefs of the Red Sea coast, Egypt. Arab Gulf Journal of Scientific Research 26:63-85
Galaxea fascicularis	34.035	26.555	L. R. Casazza. 2012. Symbiosis in the Fossil Record: Eocene Nummulites and Pleistocene Reefs of Egypt.
Galaxea fascicularis	33.9111	26.9661	L. R. Casazza. 2012. Symbiosis in the Fossil Record: Eocene Nummulites and Pleistocene Reefs of Egypt.
Galaxea fascicularis	33.5833	27.65	A. S. El-Sorogy. 2002. Paleontology and depositional environments of the Pleistocene coral reefs of the Gulf of Suez, Egypt. Neues Jahrbuch fÃ¼r Geologie und PalÃ¤ontologie, Abhandlungen 225(3):337-371
Galaxea fascicularis	35.4667	27.6833	W-C. Dullo. 1990. Facies, Fossil Record, and Age of Pleistocene Reefs from the Red Sea (Saudi Arabia). Facies 22:1-46
Galaxea fascicularis	34.2386	27.7869	H. Mewis. 2011. Field work Sinai.
Galaxea fascicularis	34.2253	27.7886	H. Mewis. 2011. Field work Sinai.
Galaxea fascicularis	34.2319	27.7956	H. Mewis. 2011. Field work Sinai.
Galaxea fascicularis	33.5	27.9333	A. S. El-Sorogy. 2002. Paleontology and depositional environments of the Pleistocene coral reefs of the Gulf of Suez, Egypt. Neues Jahrbuch fÃ¼r Geologie und PalÃ¤ontologie, Abhandlungen 225(3):337-371
Galaxea fascicularis	34.5208	28.5553	H. Mewis. 2011. Field work Sinai.
Galaxea fascicularis	34.52	28.5553	H. Mewis. 2011. Field work Sinai.
Galaxea fascicularis	34.5208	28.5558	H. Mewis. 2011. Field work Sinai.
Galaxea fascicularis	34.5303	28.5664	H. Mewis. 2011. Field work Sinai.
Galaxea fascicularis	34.5339	28.5681	H. Mewis. 2011. Field work Sinai.
Galaxea fascicularis	34.5356	28.57	H. Mewis. 2011. Field work Sinai.
Gardineroseris planulata	147.783	-6.31667	J. M. Pandolfi. 1996. Limited membership in Pleistocene reef coral assemblages from the Huon Peninsula, Papua New Guinea: constancy during global change. Paleobiology 22(2):152-176
Gardineroseris planulata	147.6	-6.1	M. Stein, G. J. Wasserburg, and P. Aharon, J. H. Chen, Z. R. Chu, A. Bloom, J. Chappell. 1993. TIMS U-series dating and stable isotopes of the last interglacial event in Papua New Guinea. Geochimica et Cosmochimica Acta 57:2541-2554
Gardineroseris planulata	147.6	-6.08333	J. M. Pandolfi. 1996. Limited membership in Pleistocene reef coral assemblages from the Huon Peninsula, Papua New Guinea: constancy during global change. Paleobiology 22(2):152-176
Gardineroseris planulata	39.6667	-4.03333	J. A. Crame. 1981. Ecological stratification in the Pleistocene coral reefs of the Kenya coast. Palaeontology 24(3):609-646
Gardineroseris planulata	35.4667	27.6833	W-C. Dullo. 1990. Facies, Fossil Record, and Age of Pleistocene Reefs from the Red Sea (Saudi Arabia). Facies 22:1-46
Goniastrea edwardsi	113.483	-24.4667	B. J. Greenstein and J. M. Pandolfi. 2008. Escaping the heat: range shifts of reef coral taxa in coastal Western Australia. Global Change Biology 14:513-528
Goniastrea edwardsi	113.4	-24.05	B. J. Greenstein and J. M. Pandolfi. 2008. Escaping the heat: range shifts of reef coral taxa in coastal Western Australia. Global Change Biology 14:513-528
Goniastrea edwardsi	113.433	-24.0333	B. J. Greenstein and J. M. Pandolfi. 2008. Escaping the heat: range shifts of reef coral taxa in coastal Western Australia. Global Change Biology 14:513-528
Goniastrea edwardsi	113.833	-22.2167	B. J. Greenstein and J. M. Pandolfi. 2008. Escaping the heat: range shifts of reef coral taxa in coastal Western Australia. Global Change Biology 14:513-528
Goniastrea edwardsi	114.117	-21.8	B. J. Greenstein and J. M. Pandolfi. 2008. Escaping the heat: range shifts of reef coral taxa in coastal Western Australia. Global Change Biology 14:513-528
Goniastrea edwardsi	145.333	-15.4167	J. M. Webster and P. J. Davies. 2003. Coral variation in two deep drill cores: significance for the Pleistocene development of the Great Barrier Reef. Sedimentary Geology 159(1-2):61-80
Goniastrea edwardsi	147.783	-6.31667	J. M. Pandolfi. 1996. Limited membership in Pleistocene reef coral assemblages from the Huon Peninsula, Papua New Guinea: constancy during global change. Paleobiology 22(2):152-176
Goniastrea edwardsi	147.683	-6.25	W. Kiessling, C. Simpson, and B. Beck, J. Pandolfi. 2011. Taxonomic vetting of Pleistocene coral occurrence data.
Goniastrea edwardsi	147.667	-6.21667	J. M. Pandolfi. 1996. Limited membership in Pleistocene reef coral assemblages from the Huon Peninsula, Papua New Guinea: constancy during global change. Paleobiology 22(2):152-176
Goniastrea edwardsi	147.6	-6.08333	J. M. Pandolfi. 1996. Limited membership in Pleistocene reef coral assemblages from the Huon Peninsula, Papua New Guinea: constancy during global change. Paleobiology 22(2):152-176
Goniastrea edwardsi	34.2319	27.7956	H. Mewis. 2011. Field work Sinai.
Goniastrea edwardsi	34.5339	28.5681	H. Mewis. 2011. Field work Sinai.
Goniastrea edwardsi	34.5356	28.57	H. Mewis. 2011. Field work Sinai.
Goniastrea favulus	115.517	-32	B. J. Greenstein and J. M. Pandolfi. 2008. Escaping the heat: range shifts of reef coral taxa in coastal Western Australia. Global Change Biology 14:513-528
Goniastrea favulus	115.5	-32	B. J. Greenstein and J. M. Pandolfi. 2008. Escaping the heat: range shifts of reef coral taxa in coastal Western Australia. Global Change Biology 14:513-528
Goniastrea favulus	113.483	-24.4667	B. J. Greenstein and J. M. Pandolfi. 2008. Escaping the heat: range shifts of reef coral taxa in coastal Western Australia. Global Change Biology 14:513-528
Goniastrea favulus	113.383	-24.2167	B. J. Greenstein and J. M. Pandolfi. 2008. Escaping the heat: range shifts of reef coral taxa in coastal Western Australia. Global Change Biology 14:513-528
Goniastrea favulus	113.833	-22.2167	B. J. Greenstein and J. M. Pandolfi. 2008. Escaping the heat: range shifts of reef coral taxa in coastal Western Australia. Global Change Biology 14:513-528
Goniastrea favulus	114.117	-21.8	B. J. Greenstein and J. M. Pandolfi. 2008. Escaping the heat: range shifts of reef coral taxa in coastal Western Australia. Global Change Biology 14:513-528
Goniastrea pectinata	124.533	-8.16667	W. S. Hantoro, P. A. Pirazzoli, and C. Jouannic, C. T. Hoang, U. Radtke, C. Causse, M. Borel Best, R. Lafont, S. Bieda, K. Lambeck. 1994. Quaternary uplifted coral reef terraces on Alor Island, East Indonesia. Coral Reefs 13:215-223
Goniastrea pectinata	147.783	-6.31667	J. M. Pandolfi. 1996. Limited membership in Pleistocene reef coral assemblages from the Huon Peninsula, Papua New Guinea: constancy during global change. Paleobiology 22(2):152-176
Goniastrea pectinata	147.6	-6.08333	J. M. Pandolfi. 1996. Limited membership in Pleistocene reef coral assemblages from the Huon Peninsula, Papua New Guinea: constancy during global change. Paleobiology 22(2):152-176
Goniastrea pectinata	39.6667	-4.03333	J. A. Crame. 1981. Ecological stratification in the Pleistocene coral reefs of the Kenya coast. Palaeontology 24(3):609-646
Goniastrea pectinata	39.7	-4	J. A. Crame. 1980. Succession and diversity in the Pleistocene coral reefs of the Kenya Coast. Palaeontology 23(1):1-37
Goniastrea pectinata	40	15.15	J. H. Bruggemann, R. T. Buffler, and M. M. M. Guillaume, R. C. Walter, R. v. Cosel, B. N. Ghebretensae, S. M. Berhe. 2004. Stratigraphy, palaeoenvironments and model for the deposition of the Abdur Reef Limestone: context for an important archaeological site from the last interglacial on the Red Sea coast of Eritrea. Palaeogeography, Palaeoclimatology, Palaeoecology 203(3):179-206
Goniastrea pectinata	39.4667	15.6167	E. Montanaro Gallitelli. 1973. Ricerche eseguite negli anni 1941-1942 sopra i Coralli delle scogliere emerse di Massaua e Gibuti [Research done between 1941 and 1942 on emersed coral reefs of Massawa and Djibouti]. Missione Geologica dell'Azienda Generale Italiana Petroli (AGIP) nella Dancalia Meridionale e sugli Altipiani Hararini (1936-1938) 4(2):446-519
Goniastrea pectinata	38.9333	22.8	A. El-Sorogy, M. Youssef, and M. Al-Sabrouty, N. Al-Otaiby. 2013. Facies pattern and molluscan fauna of the Late Pleistocene raised coral reef of Rabigh area, Red Sea coast, Saudi Arabia.
Goniastrea pectinata	124.221	24.4542	H. L. Foster. 1965. Geology of Ishigaki-shima Ryukyu-retto. United States Geological Survey Professional Paper 399(A):1-119
Goniastrea pectinata	34.25	26.15	A. S. El-Sorogy. 2008. Contributions to the Pleistocene coral reefs of the Red Sea coast, Egypt. Arab Gulf Journal of Scientific Research 26:63-85
Goniastrea pectinata	35.4667	27.6833	W-C. Dullo. 1990. Facies, Fossil Record, and Age of Pleistocene Reefs from the Red Sea (Saudi Arabia). Facies 22:1-46
Goniastrea retiformis	115.517	-32	B. J. Greenstein and J. M. Pandolfi. 2008. Escaping the heat: range shifts of reef coral taxa in coastal Western Australia. Global Change Biology 14:513-528
Goniastrea retiformis	115.5	-32	B. J. Greenstein and J. M. Pandolfi. 2008. Escaping the heat: range shifts of reef coral taxa in coastal Western Australia. Global Change Biology 14:513-528
Goniastrea retiformis	113.383	-24.2167	B. J. Greenstein and J. M. Pandolfi. 2008. Escaping the heat: range shifts of reef coral taxa in coastal Western Australia. Global Change Biology 14:513-528
Goniastrea retiformis	113.433	-24.0333	B. J. Greenstein and J. M. Pandolfi. 2008. Escaping the heat: range shifts of reef coral taxa in coastal Western Australia. Global Change Biology 14:513-528
Goniastrea retiformis	114.117	-21.8	B. J. Greenstein and J. M. Pandolfi. 2008. Escaping the heat: range shifts of reef coral taxa in coastal Western Australia. Global Change Biology 14:513-528
Goniastrea retiformis	57.5	-20.3333	L. F. Montaggioni. 1982. Pleistocene marine depositional environments from Mauritius island, Indian Ocean. Geobios 15(2):161-179
Goniastrea retiformis	145.333	-15.4167	J. M. Webster and P. J. Davies. 2003. Coral variation in two deep drill cores: significance for the Pleistocene development of the Great Barrier Reef. Sedimentary Geology 159(1-2):61-80
Goniastrea retiformis	166.683	-13.4333	F. W. Taylor, C. Jouannic, and A. L. Bloom. 1985. Quaternary uplift of the Torres Islands, northern New Hebrides frontal arc: comparison with Santo and Malekula Islands, central New Hebrides frontal arc. Journal of Geology 93:419-438
Goniastrea retiformis	147.783	-6.31667	J. M. Pandolfi. 1996. Limited membership in Pleistocene reef coral assemblages from the Huon Peninsula, Papua New Guinea: constancy during global change. Paleobiology 22(2):152-176
Goniastrea retiformis	147.683	-6.25	J. M. Pandolfi. 1996. Limited membership in Pleistocene reef coral assemblages from the Huon Peninsula, Papua New Guinea: constancy during global change. Paleobiology 22(2):152-176
Goniastrea retiformis	147.667	-6.21667	J. M. Pandolfi. 1996. Limited membership in Pleistocene reef coral assemblages from the Huon Peninsula, Papua New Guinea: constancy during global change. Paleobiology 22(2):152-176
Goniastrea retiformis	147.6	-6.08333	J. M. Pandolfi. 1996. Limited membership in Pleistocene reef coral assemblages from the Huon Peninsula, Papua New Guinea: constancy during global change. Paleobiology 22(2):152-176
Goniastrea retiformis	39.6167	-4.15	J. A. Crame. 1986. Late Pleistocene molluscan assemblages from the coral reefs of the Kenya coast. Coral Reefs 4:183-196
Goniastrea retiformis	39.6833	-4.05	J. A. Crame. 1980. Succession and diversity in the Pleistocene coral reefs of the Kenya Coast. Palaeontology 23(1):1-37
Goniastrea retiformis	39.6667	-4.03333	J. A. Crame. 1981. Ecological stratification in the Pleistocene coral reefs of the Kenya coast. Palaeontology 24(3):609-646
Goniastrea retiformis	39.7	-4	J. A. Crame. 1980. Succession and diversity in the Pleistocene coral reefs of the Kenya Coast. Palaeontology 23(1):1-37
Goniastrea retiformis	43.15	11.6	E. Montanaro Gallitelli. 1973. Ricerche eseguite negli anni 1941-1942 sopra i Coralli delle scogliere emerse di Massaua e Gibuti [Research done between 1941 and 1942 on emersed coral reefs of Massawa and Djibouti]. Missione Geologica dell'Azienda Generale Italiana Petroli (AGIP) nella Dancalia Meridionale e sugli Altipiani Hararini (1936-1938) 4(2):446-519
Goniastrea retiformis	40	15.15	J. H. Bruggemann, R. T. Buffler, and M. M. M. Guillaume, R. C. Walter, R. v. Cosel, B. N. Ghebretensae, S. M. Berhe. 2004. Stratigraphy, palaeoenvironments and model for the deposition of the Abdur Reef Limestone: context for an important archaeological site from the last interglacial on the Red Sea coast of Eritrea. Palaeogeography, Palaeoclimatology, Palaeoecology 203(3):179-206
Goniastrea retiformis	39.4667	15.6167	E. Montanaro Gallitelli. 1973. Ricerche eseguite negli anni 1941-1942 sopra i Coralli delle scogliere emerse di Massaua e Gibuti [Research done between 1941 and 1942 on emersed coral reefs of Massawa and Djibouti]. Missione Geologica dell'Azienda Generale Italiana Petroli (AGIP) nella Dancalia Meridionale e sugli Altipiani Hararini (1936-1938) 4(2):446-519
Goniastrea retiformis	69	22.4167	D. K. Pandey and R. Singh. 2010. Early Pliocene - Holocene Favia from the northern and northwestern coastal areas of Saurashtra Peninsula, western India. Journal of the Palaeontological Society of India 55(2):107-120
Goniastrea retiformis	38.9333	22.8	A. El-Sorogy, M. Youssef, and M. Al-Sabrouty, N. Al-Otaiby. 2013. Facies pattern and molluscan fauna of the Late Pleistocene raised coral reef of Rabigh area, Red Sea coast, Saudi Arabia.
Goniastrea retiformis	34.25	26.15	A. S. El-Sorogy. 1997. Progressive diagenetic sequence from Pleistocene coral reefs in the area between Quseir and Mersa Alam, Red Sea coast, Egypt. Egyptian journal of geology 41(1):519-540
Goniastrea retiformis	35.4667	27.6833	W-C. Dullo. 1990. Facies, Fossil Record, and Age of Pleistocene Reefs from the Red Sea (Saudi Arabia). Facies 22:1-46
Goniastrea retiformis	34.2386	27.7869	H. Mewis. 2011. Field work Sinai.
Goniastrea retiformis	34.2253	27.7886	H. Mewis. 2011. Field work Sinai.
Goniastrea retiformis	34.2253	27.7889	H. Mewis. 2011. Field work Sinai.
Goniastrea stelligera	114.933	-29.2667	B. J. Greenstein and J. M. Pandolfi. 2008. Escaping the heat: range shifts of reef coral taxa in coastal Western Australia. Global Change Biology 14:513-528
Goniastrea stelligera	114.9	-29.2667	B. J. Greenstein and J. M. Pandolfi. 2008. Escaping the heat: range shifts of reef coral taxa in coastal Western Australia. Global Change Biology 14:513-528
Goniastrea stelligera	113.717	-28.4333	B. J. Greenstein and J. M. Pandolfi. 2008. Escaping the heat: range shifts of reef coral taxa in coastal Western Australia. Global Change Biology 14:513-528
Goniastrea stelligera	113.733	-28.4167	B. J. Greenstein and J. M. Pandolfi. 2008. Escaping the heat: range shifts of reef coral taxa in coastal Western Australia. Global Change Biology 14:513-528
Goniastrea stelligera	113.483	-24.4667	B. J. Greenstein and J. M. Pandolfi. 2008. Escaping the heat: range shifts of reef coral taxa in coastal Western Australia. Global Change Biology 14:513-528
Goniastrea stelligera	113.383	-24.2167	B. J. Greenstein and J. M. Pandolfi. 2008. Escaping the heat: range shifts of reef coral taxa in coastal Western Australia. Global Change Biology 14:513-528
Goniastrea stelligera	113.4	-24.05	B. J. Greenstein and J. M. Pandolfi. 2008. Escaping the heat: range shifts of reef coral taxa in coastal Western Australia. Global Change Biology 14:513-528
Goniastrea stelligera	113.433	-24.0333	B. J. Greenstein and J. M. Pandolfi. 2008. Escaping the heat: range shifts of reef coral taxa in coastal Western Australia. Global Change Biology 14:513-528
Goniastrea stelligera	167.417	-22.55	J. Launay. 1985. Paleoniveaux marins et neotectonique a l'Ile des Pins (Nouvelle-Caledonie) [Marine paleolevels and neotectonics at Ile des Pins (New Caledonia)]. Geologie de la France 1:77-81
Goniastrea stelligera	114.117	-21.8	B. J. Greenstein and J. M. Pandolfi. 2008. Escaping the heat: range shifts of reef coral taxa in coastal Western Australia. Global Change Biology 14:513-528
Goniastrea stelligera	166.683	-13.4333	F. W. Taylor, C. Jouannic, and A. L. Bloom. 1985. Quaternary uplift of the Torres Islands, northern New Hebrides frontal arc: comparison with Santo and Malekula Islands, central New Hebrides frontal arc. Journal of Geology 93:419-438
Goniastrea stelligera	147.783	-6.31667	J. M. Pandolfi. 1996. Limited membership in Pleistocene reef coral assemblages from the Huon Peninsula, Papua New Guinea: constancy during global change. Paleobiology 22(2):152-176
Goniastrea stelligera	147.683	-6.25	J. M. Pandolfi. 1996. Limited membership in Pleistocene reef coral assemblages from the Huon Peninsula, Papua New Guinea: constancy during global change. Paleobiology 22(2):152-176
Goniastrea stelligera	147.667	-6.21667	J. M. Pandolfi. 1996. Limited membership in Pleistocene reef coral assemblages from the Huon Peninsula, Papua New Guinea: constancy during global change. Paleobiology 22(2):152-176
Goniastrea stelligera	147.6	-6.08333	J. M. Pandolfi. 1996. Limited membership in Pleistocene reef coral assemblages from the Huon Peninsula, Papua New Guinea: constancy during global change. Paleobiology 22(2):152-176
Goniastrea stelligera	39.4833	-4.45	J. A. Crame. 1981. Ecological stratification in the Pleistocene coral reefs of the Kenya coast. Palaeontology 24(3):609-646
Goniastrea stelligera	39.6167	-4.15	J. A. Crame. 1986. Late Pleistocene molluscan assemblages from the coral reefs of the Kenya coast. Coral Reefs 4:183-196
Goniastrea stelligera	39.7	-4	J. A. Crame. 1980. Succession and diversity in the Pleistocene coral reefs of the Kenya Coast. Palaeontology 23(1):1-37
Goniastrea stelligera	40.1333	-3.25	J. A. Crame. 1980. Succession and diversity in the Pleistocene coral reefs of the Kenya Coast. Palaeontology 23(1):1-37
Goniastrea stelligera	43.15	11.6	E. Montanaro Gallitelli. 1973. Ricerche eseguite negli anni 1941-1942 sopra i Coralli delle scogliere emerse di Massaua e Gibuti [Research done between 1941 and 1942 on emersed coral reefs of Massawa and Djibouti]. Missione Geologica dell'Azienda Generale Italiana Petroli (AGIP) nella Dancalia Meridionale e sugli Altipiani Hararini (1936-1938) 4(2):446-519
Goniastrea stelligera	39.4667	15.6167	E. Montanaro Gallitelli. 1973. Ricerche eseguite negli anni 1941-1942 sopra i Coralli delle scogliere emerse di Massaua e Gibuti [Research done between 1941 and 1942 on emersed coral reefs of Massawa and Djibouti]. Missione Geologica dell'Azienda Generale Italiana Petroli (AGIP) nella Dancalia Meridionale e sugli Altipiani Hararini (1936-1938) 4(2):446-519
Goniastrea stelligera	34.4847	25.7856	L. R. Casazza. 2012. Symbiosis in the Fossil Record: Eocene Nummulites and Pleistocene Reefs of Egypt.
Goniastrea stelligera	34.035	26.555	L. R. Casazza. 2012. Symbiosis in the Fossil Record: Eocene Nummulites and Pleistocene Reefs of Egypt.
Goniastrea stelligera	33.5833	27.65	A. S. El-Sorogy. 2002. Paleontology and depositional environments of the Pleistocene coral reefs of the Gulf of Suez, Egypt. Neues Jahrbuch fÃ¼r Geologie und PalÃ¤ontologie, Abhandlungen 225(3):337-371
Goniastrea stelligera	35.4667	27.6833	W-C. Dullo. 1990. Facies, Fossil Record, and Age of Pleistocene Reefs from the Red Sea (Saudi Arabia). Facies 22:1-46
Goniopora columna	40	15.15	J. H. Bruggemann, R. T. Buffler, and M. M. M. Guillaume, R. C. Walter, R. v. Cosel, B. N. Ghebretensae, S. M. Berhe. 2004. Stratigraphy, palaeoenvironments and model for the deposition of the Abdur Reef Limestone: context for an important archaeological site from the last interglacial on the Red Sea coast of Eritrea. Palaeogeography, Palaeoclimatology, Palaeoecology 203(3):179-206
Goniopora lobata	153.367	-29.1	J. Pickett. 1981. A Late Pleistocene coral fauna from Evans Head, N.S.W. Alcheringa 5:71-83
Goniopora planulata	39.4667	15.6167	E. Montanaro Gallitelli. 1973. Ricerche eseguite negli anni 1941-1942 sopra i Coralli delle scogliere emerse di Massaua e Gibuti [Research done between 1941 and 1942 on emersed coral reefs of Massawa and Djibouti]. Missione Geologica dell'Azienda Generale Italiana Petroli (AGIP) nella Dancalia Meridionale e sugli Altipiani Hararini (1936-1938) 4(2):446-519
Goniopora planulata	35.4667	27.6833	W-C. Dullo. 1990. Facies, Fossil Record, and Age of Pleistocene Reefs from the Red Sea (Saudi Arabia). Facies 22:1-46
Goniopora savignyi	35.4667	27.6833	W-C. Dullo. 1990. Facies, Fossil Record, and Age of Pleistocene Reefs from the Red Sea (Saudi Arabia). Facies 22:1-46
Goniopora tenella	35.4667	27.6833	W-C. Dullo. 1990. Facies, Fossil Record, and Age of Pleistocene Reefs from the Red Sea (Saudi Arabia). Facies 22:1-46
Gyrosmilia interrupta	34.2319	27.7956	H. Mewis. 2011. Field work Sinai.
Heliofungia actiniformis	153.367	-29.1	J. Pickett. 1981. A Late Pleistocene coral fauna from Evans Head, N.S.W. Alcheringa 5:71-83
Heliofungia fralinae	40	15.15	J. H. Bruggemann, R. T. Buffler, and M. M. M. Guillaume, R. C. Walter, R. v. Cosel, B. N. Ghebretensae, S. M. Berhe. 2004. Stratigraphy, palaeoenvironments and model for the deposition of the Abdur Reef Limestone: context for an important archaeological site from the last interglacial on the Red Sea coast of Eritrea. Palaeogeography, Palaeoclimatology, Palaeoecology 203(3):179-206
Herpolitha limax	40	15.15	J. H. Bruggemann, R. T. Buffler, and M. M. M. Guillaume, R. C. Walter, R. v. Cosel, B. N. Ghebretensae, S. M. Berhe. 2004. Stratigraphy, palaeoenvironments and model for the deposition of the Abdur Reef Limestone: context for an important archaeological site from the last interglacial on the Red Sea coast of Eritrea. Palaeogeography, Palaeoclimatology, Palaeoecology 203(3):179-206
Hydnophora exesa	153.367	-29.1	J. Pickett. 1981. A Late Pleistocene coral fauna from Evans Head, N.S.W. Alcheringa 5:71-83
Hydnophora exesa	39.5833	-4.28333	J. A. Crame. 1981. Ecological stratification in the Pleistocene coral reefs of the Kenya coast. Palaeontology 24(3):609-646
Hydnophora microconos	113.733	-28.4167	B. J. Greenstein and J. M. Pandolfi. 2008. Escaping the heat: range shifts of reef coral taxa in coastal Western Australia. Global Change Biology 14:513-528
Hydnophora microconos	147.783	-6.31667	J. M. Pandolfi. 1996. Limited membership in Pleistocene reef coral assemblages from the Huon Peninsula, Papua New Guinea: constancy during global change. Paleobiology 22(2):152-176
Hydnophora microconos	147.583	-6.11667	M. Stein, G. J. Wasserburg, and P. Aharon, J. H. Chen, Z. R. Chu, A. Bloom, J. Chappell. 1993. TIMS U-series dating and stable isotopes of the last interglacial event in Papua New Guinea. Geochimica et Cosmochimica Acta 57:2541-2554
Hydnophora microconos	147.6	-6.08333	J. M. Pandolfi. 1996. Limited membership in Pleistocene reef coral assemblages from the Huon Peninsula, Papua New Guinea: constancy during global change. Paleobiology 22(2):152-176
Hydnophora microconos	40.1333	-3.25	J. A. Crame. 1980. Succession and diversity in the Pleistocene coral reefs of the Kenya Coast. Palaeontology 23(1):1-37
Hydnophora microconos	43.15	11.6	E. Montanaro Gallitelli. 1973. Ricerche eseguite negli anni 1941-1942 sopra i Coralli delle scogliere emerse di Massaua e Gibuti [Research done between 1941 and 1942 on emersed coral reefs of Massawa and Djibouti]. Missione Geologica dell'Azienda Generale Italiana Petroli (AGIP) nella Dancalia Meridionale e sugli Altipiani Hararini (1936-1938) 4(2):446-519
Hydnophora microconos	40	15.15	J. H. Bruggemann, R. T. Buffler, and M. M. M. Guillaume, R. C. Walter, R. v. Cosel, B. N. Ghebretensae, S. M. Berhe. 2004. Stratigraphy, palaeoenvironments and model for the deposition of the Abdur Reef Limestone: context for an important archaeological site from the last interglacial on the Red Sea coast of Eritrea. Palaeogeography, Palaeoclimatology, Palaeoecology 203(3):179-206
Hydnophora microconos	35.4667	27.6833	W-C. Dullo. 1990. Facies, Fossil Record, and Age of Pleistocene Reefs from the Red Sea (Saudi Arabia). Facies 22:1-46
Hydnophora microconos	34.5303	28.5664	H. Mewis. 2011. Field work Sinai.
Isophyllia rigida	-69.1	12.3667	J. M. Pandolfi. 2001. Community structure of Pleistocene coral reefs of Curacao, Netherlands Antilles. Ecological Monographs 71(1):49-67
Isophyllia rigida	-81.7167	12.5	J. M. Pandolfi and J. B. C. Jackson. 2007. Broad-scale patterns in Pleistocene coral reef communities from the Caribbean: implications for ecology and management. In R. B. Aronson (ed.), Geological approaches to coral reef ecology. Ecological Studies 192:201-236
Isophyllia rigida	-81.7	12.5	J. M. Pandolfi and J. B. C. Jackson. 2007. Broad-scale patterns in Pleistocene coral reef communities from the Caribbean: implications for ecology and management. In R. B. Aronson (ed.), Geological approaches to coral reef ecology. Ecological Studies 192:201-236
Isophyllia rigida	-76.3167	17.8833	S. A. James. 2006. Coral Biodiversity and Zonation on a Pleistocene Reef, Southeastern Jamaica. Jamaica Clearing House Mechanism
Isophyllia rigida	-81.3833	19.2667	I. G. Hunter and B. Jones. 1996. Coral associations of the Pleistocene Ironshore Formation, Grand Cayman. Coral Reefs 15(4):249-267
Isophyllia rigida	-81.3833	19.2833	I. G. Hunter and B. Jones. 1996. Coral associations of the Pleistocene Ironshore Formation, Grand Cayman. Coral Reefs 15(4):249-267
Isophyllia rigida	-81.3667	19.3667	I. G. Hunter and B. Jones. 1996. Coral associations of the Pleistocene Ironshore Formation, Grand Cayman. Coral Reefs 15(4):249-267
Isophyllia rigida	-81.4	19.3667	I. G. Hunter and B. Jones. 1996. Coral associations of the Pleistocene Ironshore Formation, Grand Cayman. Coral Reefs 15(4):249-267
Isophyllia rigida	-81.4167	19.3667	I. G. Hunter and B. Jones. 1996. Coral associations of the Pleistocene Ironshore Formation, Grand Cayman. Coral Reefs 15(4):249-267
Isophyllia rigida	-81.4	19.3833	I. G. Hunter and B. Jones. 1996. Coral associations of the Pleistocene Ironshore Formation, Grand Cayman. Coral Reefs 15(4):249-267
Isophyllia rigida	-87.1208	20.5778	E. JordÃ¡n-Dahlgren. 1997. A Caribbean coral reef community of the Pleistocene. Proceedings of the 8th International Coral Reef Symposium 2:1681-1686
Isophyllia rigida	-73.6833	21.0167	A. F. Budd and J. M. Pandolfi. 2004. Overlapping species boundaries and hybridization within the Montastrea "annularis" reef coral complex in the Pleistocene of the Bahama Islands. Paleobiology 30(3):396-425
Isophyllia rigida	-78	25.1333	A. F. Budd and J. M. Pandolfi. 2004. Overlapping species boundaries and hybridization within the Montastrea "annularis" reef coral complex in the Pleistocene of the Bahama Islands. Paleobiology 30(3):396-425
Isophyllia sinuosa	-69.5167	18.4167	J. S. Klaus and A. F. Budd. 2003. Comparison of Caribbean coral reef communities before and after Plio-Pleistocene faunal turnover: Analyses of two Dominican Republic reef sequences. Palaios 18(1):3-21
Isophyllia sinuosa	-81.3833	19.2667	I. G. Hunter and B. Jones. 1996. Coral associations of the Pleistocene Ironshore Formation, Grand Cayman. Coral Reefs 15(4):249-267
Isophyllia sinuosa	-81.3333	19.2833	I. G. Hunter and B. Jones. 1996. Coral associations of the Pleistocene Ironshore Formation, Grand Cayman. Coral Reefs 15(4):249-267
Isophyllia sinuosa	-81.3667	19.35	I. G. Hunter and B. Jones. 1996. Coral associations of the Pleistocene Ironshore Formation, Grand Cayman. Coral Reefs 15(4):249-267
Isophyllia sinuosa	-81.4	19.3667	I. G. Hunter and B. Jones. 1996. Coral associations of the Pleistocene Ironshore Formation, Grand Cayman. Coral Reefs 15(4):249-267
Isophyllia sinuosa	-81.4	19.3833	I. G. Hunter and B. Jones. 1996. Coral associations of the Pleistocene Ironshore Formation, Grand Cayman. Coral Reefs 15(4):249-267
Isophyllia sinuosa	-81.3833	19.3833	I. G. Hunter and B. Jones. 1996. Coral associations of the Pleistocene Ironshore Formation, Grand Cayman. Coral Reefs 15(4):249-267
Isophyllia sinuosa	-87.1208	20.5778	E. JordÃ¡n-Dahlgren. 1997. A Caribbean coral reef community of the Pleistocene. Proceedings of the 8th International Coral Reef Symposium 2:1681-1686
Isophyllia sinuosa	-74.55	23.95	D. E. Hattin and V. L. Warren. 1989. Stratigraphic analysis of a fossil Neogoniolithon-capped patch reef and associated facies, San Salvador, Bahamas. Coral Reefs (8):19-30
Isophyllia sinuosa	-81.5667	24.6667	N. E. Weisbord. 1974. Late Cenozoic corals of south Florida. Bulletins of American Paleontology 66(285):259-544
Isophyllia sinuosa	-78	25.1333	A. F. Budd and J. M. Pandolfi. 2004. Overlapping species boundaries and hybridization within the Montastrea "annularis" reef coral complex in the Pleistocene of the Bahama Islands. Paleobiology 30(3):396-425
Isopora cuneata	147.783	-6.31667	J. M. Pandolfi. 1996. Limited membership in Pleistocene reef coral assemblages from the Huon Peninsula, Papua New Guinea: constancy during global change. Paleobiology 22(2):152-176
Isopora cuneata	147.683	-6.25	J. M. Pandolfi. 1996. Limited membership in Pleistocene reef coral assemblages from the Huon Peninsula, Papua New Guinea: constancy during global change. Paleobiology 22(2):152-176
Isopora cuneata	147.667	-6.21667	J. M. Pandolfi. 1996. Limited membership in Pleistocene reef coral assemblages from the Huon Peninsula, Papua New Guinea: constancy during global change. Paleobiology 22(2):152-176
Isopora cuneata	147.6	-6.08333	J. M. Pandolfi. 1996. Limited membership in Pleistocene reef coral assemblages from the Huon Peninsula, Papua New Guinea: constancy during global change. Paleobiology 22(2):152-176
Isopora palifera	114.933	-29.2667	B. J. Greenstein and J. M. Pandolfi. 2008. Escaping the heat: range shifts of reef coral taxa in coastal Western Australia. Global Change Biology 14:513-528
Isopora palifera	114.9	-29.2667	B. J. Greenstein and J. M. Pandolfi. 2008. Escaping the heat: range shifts of reef coral taxa in coastal Western Australia. Global Change Biology 14:513-528
Isopora palifera	113.717	-28.4333	B. J. Greenstein and J. M. Pandolfi. 2008. Escaping the heat: range shifts of reef coral taxa in coastal Western Australia. Global Change Biology 14:513-528
Isopora palifera	113.733	-28.4167	B. J. Greenstein and J. M. Pandolfi. 2008. Escaping the heat: range shifts of reef coral taxa in coastal Western Australia. Global Change Biology 14:513-528
Isopora palifera	113.4	-24.05	B. J. Greenstein and J. M. Pandolfi. 2008. Escaping the heat: range shifts of reef coral taxa in coastal Western Australia. Global Change Biology 14:513-528
Isopora palifera	113.433	-24.0333	B. J. Greenstein and J. M. Pandolfi. 2008. Escaping the heat: range shifts of reef coral taxa in coastal Western Australia. Global Change Biology 14:513-528
Isopora palifera	113.833	-22.2167	B. J. Greenstein and J. M. Pandolfi. 2008. Escaping the heat: range shifts of reef coral taxa in coastal Western Australia. Global Change Biology 14:513-528
Isopora palifera	114.117	-21.8	B. J. Greenstein and J. M. Pandolfi. 2008. Escaping the heat: range shifts of reef coral taxa in coastal Western Australia. Global Change Biology 14:513-528
Isopora palifera	145.75	-15.3333	J. M. Webster and P. J. Davies. 2003. Coral variation in two deep drill cores: significance for the Pleistocene development of the Great Barrier Reef. Sedimentary Geology 159(1-2):61-80
Isopora palifera	46.4467	-9.42194	J. D. Taylor. 1978. Faunal response to the instability of reef habitats: Pleistocene molluscan assemblages of Aldabra Atoll. Palaeontology 21(1):1-30
Isopora palifera	147.783	-6.31667	J. M. Pandolfi. 1996. Limited membership in Pleistocene reef coral assemblages from the Huon Peninsula, Papua New Guinea: constancy during global change. Paleobiology 22(2):152-176
Isopora palifera	147.683	-6.25	J. M. Pandolfi. 1996. Limited membership in Pleistocene reef coral assemblages from the Huon Peninsula, Papua New Guinea: constancy during global change. Paleobiology 22(2):152-176
Isopora palifera	147.667	-6.21667	J. M. Pandolfi. 1996. Limited membership in Pleistocene reef coral assemblages from the Huon Peninsula, Papua New Guinea: constancy during global change. Paleobiology 22(2):152-176
Isopora palifera	147.6	-6.08333	J. M. Pandolfi. 1996. Limited membership in Pleistocene reef coral assemblages from the Huon Peninsula, Papua New Guinea: constancy during global change. Paleobiology 22(2):152-176
Isopora palifera	39.6167	-4.15	J. A. Crame. 1986. Late Pleistocene molluscan assemblages from the coral reefs of the Kenya coast. Coral Reefs 4:183-196
Isopora palifera	39.6833	-4.05	J. A. Crame. 1980. Succession and diversity in the Pleistocene coral reefs of the Kenya Coast. Palaeontology 23(1):1-37
Isopora palifera	39.7	-4	J. A. Crame. 1980. Succession and diversity in the Pleistocene coral reefs of the Kenya Coast. Palaeontology 23(1):1-37
Isopora palifera	40.1333	-3.25	J. A. Crame. 1980. Succession and diversity in the Pleistocene coral reefs of the Kenya Coast. Palaeontology 23(1):1-37
Leptastrea bottae	43.15	11.6	E. Montanaro Gallitelli. 1973. Ricerche eseguite negli anni 1941-1942 sopra i Coralli delle scogliere emerse di Massaua e Gibuti [Research done between 1941 and 1942 on emersed coral reefs of Massawa and Djibouti]. Missione Geologica dell'Azienda Generale Italiana Petroli (AGIP) nella Dancalia Meridionale e sugli Altipiani Hararini (1936-1938) 4(2):446-519
Leptastrea bottae	40	15.15	J. H. Bruggemann, R. T. Buffler, and M. M. M. Guillaume, R. C. Walter, R. v. Cosel, B. N. Ghebretensae, S. M. Berhe. 2004. Stratigraphy, palaeoenvironments and model for the deposition of the Abdur Reef Limestone: context for an important archaeological site from the last interglacial on the Red Sea coast of Eritrea. Palaeogeography, Palaeoclimatology, Palaeoecology 203(3):179-206
Leptastrea bottae	34.035	26.555	L. R. Casazza. 2012. Symbiosis in the Fossil Record: Eocene Nummulites and Pleistocene Reefs of Egypt.
Leptastrea purpurea	147.783	-6.31667	J. M. Pandolfi. 1996. Limited membership in Pleistocene reef coral assemblages from the Huon Peninsula, Papua New Guinea: constancy during global change. Paleobiology 22(2):152-176
Leptastrea purpurea	147.6	-6.08333	J. M. Pandolfi. 1996. Limited membership in Pleistocene reef coral assemblages from the Huon Peninsula, Papua New Guinea: constancy during global change. Paleobiology 22(2):152-176
Leptastrea purpurea	35.4667	27.6833	W-C. Dullo. 1990. Facies, Fossil Record, and Age of Pleistocene Reefs from the Red Sea (Saudi Arabia). Facies 22:1-46
Leptoria phrygia	166.467	-22.4833	G. Cabioch, L. Montaggioni, and N. Thouveny, N. Frank, T. Sato, V. Chazottes, H. Dalamasso, C. Payri, M. Pichon, A. M. Semah. 2008. The chronology and structure of the western New Caledonian barrier reef tracts. Palaeogeography, Palaeoclimatology, Palaeoecology 268:91-105
Leptoria phrygia	57.5	-20.3333	L. F. Montaggioni. 1982. Pleistocene marine depositional environments from Mauritius island, Indian Ocean. Geobios 15(2):161-179
Leptoria phrygia	168.254	-17.5817	H. Mewis. 2011. Field work Vanuatu.
Leptoria phrygia	168.255	-17.5789	H. Mewis. 2011. Field work Vanuatu.
Leptoria phrygia	168.255	-17.5775	H. Mewis. 2011. Field work Vanuatu.
Leptoria phrygia	168.255	-17.5758	H. Mewis. 2011. Field work Vanuatu.
Leptoria phrygia	166.633	-13.35	F. W. Taylor, C. Jouannic, and A. L. Bloom. 1985. Quaternary uplift of the Torres Islands, northern New Hebrides frontal arc: comparison with Santo and Malekula Islands, central New Hebrides frontal arc. Journal of Geology 93:419-438
Leptoria phrygia	147.783	-6.31667	J. M. Pandolfi. 1996. Limited membership in Pleistocene reef coral assemblages from the Huon Peninsula, Papua New Guinea: constancy during global change. Paleobiology 22(2):152-176
Leptoria phrygia	147.6	-6.08333	J. M. Pandolfi. 1996. Limited membership in Pleistocene reef coral assemblages from the Huon Peninsula, Papua New Guinea: constancy during global change. Paleobiology 22(2):152-176
Leptoria phrygia	40.1333	-3.25	J. A. Crame. 1980. Succession and diversity in the Pleistocene coral reefs of the Kenya Coast. Palaeontology 23(1):1-37
Leptoria phrygia	43.15	11.6	E. Montanaro Gallitelli. 1973. Ricerche eseguite negli anni 1941-1942 sopra i Coralli delle scogliere emerse di Massaua e Gibuti [Research done between 1941 and 1942 on emersed coral reefs of Massawa and Djibouti]. Missione Geologica dell'Azienda Generale Italiana Petroli (AGIP) nella Dancalia Meridionale e sugli Altipiani Hararini (1936-1938) 4(2):446-519
Leptoria phrygia	35.4667	27.6833	W-C. Dullo. 1990. Facies, Fossil Record, and Age of Pleistocene Reefs from the Red Sea (Saudi Arabia). Facies 22:1-46
Leptoseris cucullata	-81.3667	19.3667	I. G. Hunter and B. Jones. 1996. Coral associations of the Pleistocene Ironshore Formation, Grand Cayman. Coral Reefs 15(4):249-267
Leptoseris cucullata	-81.5667	24.6667	N. E. Weisbord. 1974. Late Cenozoic corals of south Florida. Bulletins of American Paleontology 66(285):259-544
Leptoseris mycetoseroides	129.928	28.3214	T. Nakamori. 1986. Community Structures of Recent and Pleistocene Hermatypic Corals in the Ryukyu Islands, Japan. Tohoku University Science Reports, Second Series, Geology 56(2):71-133
Leptoseris yabei	35.4667	27.6833	W-C. Dullo. 1990. Facies, Fossil Record, and Age of Pleistocene Reefs from the Red Sea (Saudi Arabia). Facies 22:1-46
Lithophyllon concinna	43.15	11.6	E. Montanaro Gallitelli. 1973. Ricerche eseguite negli anni 1941-1942 sopra i Coralli delle scogliere emerse di Massaua e Gibuti [Research done between 1941 and 1942 on emersed coral reefs of Massawa and Djibouti]. Missione Geologica dell'Azienda Generale Italiana Petroli (AGIP) nella Dancalia Meridionale e sugli Altipiani Hararini (1936-1938) 4(2):446-519
Lithophyllon concinna	40	15.15	J. H. Bruggemann, R. T. Buffler, and M. M. M. Guillaume, R. C. Walter, R. v. Cosel, B. N. Ghebretensae, S. M. Berhe. 2004. Stratigraphy, palaeoenvironments and model for the deposition of the Abdur Reef Limestone: context for an important archaeological site from the last interglacial on the Red Sea coast of Eritrea. Palaeogeography, Palaeoclimatology, Palaeoecology 203(3):179-206
Lithophyllon concinna	39.4667	15.6167	E. Montanaro Gallitelli. 1973. Ricerche eseguite negli anni 1941-1942 sopra i Coralli delle scogliere emerse di Massaua e Gibuti [Research done between 1941 and 1942 on emersed coral reefs of Massawa and Djibouti]. Missione Geologica dell'Azienda Generale Italiana Petroli (AGIP) nella Dancalia Meridionale e sugli Altipiani Hararini (1936-1938) 4(2):446-519
Lithophyllon concinna	35.4667	27.6833	W-C. Dullo. 1990. Facies, Fossil Record, and Age of Pleistocene Reefs from the Red Sea (Saudi Arabia). Facies 22:1-46
Lithophyllon repanda	40	15.15	J. H. Bruggemann, R. T. Buffler, and M. M. M. Guillaume, R. C. Walter, R. v. Cosel, B. N. Ghebretensae, S. M. Berhe. 2004. Stratigraphy, palaeoenvironments and model for the deposition of the Abdur Reef Limestone: context for an important archaeological site from the last interglacial on the Red Sea coast of Eritrea. Palaeogeography, Palaeoclimatology, Palaeoecology 203(3):179-206
Lithophyllon repanda	39.4667	15.6167	E. Montanaro Gallitelli. 1973. Ricerche eseguite negli anni 1941-1942 sopra i Coralli delle scogliere emerse di Massaua e Gibuti [Research done between 1941 and 1942 on emersed coral reefs of Massawa and Djibouti]. Missione Geologica dell'Azienda Generale Italiana Petroli (AGIP) nella Dancalia Meridionale e sugli Altipiani Hararini (1936-1938) 4(2):446-519
Lithophyllon repanda	35.4667	27.6833	W-C. Dullo. 1990. Facies, Fossil Record, and Age of Pleistocene Reefs from the Red Sea (Saudi Arabia). Facies 22:1-46
Lobactis scutaria	35.4667	27.6833	W-C. Dullo. 1990. Facies, Fossil Record, and Age of Pleistocene Reefs from the Red Sea (Saudi Arabia). Facies 22:1-46
Lobophyllia corymbosa	153.367	-29.1	J. Pickett. 1981. A Late Pleistocene coral fauna from Evans Head, N.S.W. Alcheringa 5:71-83
Lobophyllia corymbosa	147.783	-6.31667	J. M. Pandolfi. 1996. Limited membership in Pleistocene reef coral assemblages from the Huon Peninsula, Papua New Guinea: constancy during global change. Paleobiology 22(2):152-176
Lobophyllia corymbosa	147.6	-6.08333	J. M. Pandolfi. 1996. Limited membership in Pleistocene reef coral assemblages from the Huon Peninsula, Papua New Guinea: constancy during global change. Paleobiology 22(2):152-176
Lobophyllia corymbosa	39.4833	-4.45	J. A. Crame. 1981. Ecological stratification in the Pleistocene coral reefs of the Kenya coast. Palaeontology 24(3):609-646
Lobophyllia corymbosa	39.5833	-4.28333	J. A. Crame. 1981. Ecological stratification in the Pleistocene coral reefs of the Kenya coast. Palaeontology 24(3):609-646
Lobophyllia corymbosa	40.1333	-3.25	J. A. Crame. 1980. Succession and diversity in the Pleistocene coral reefs of the Kenya Coast. Palaeontology 23(1):1-37
Lobophyllia corymbosa	39.4667	15.6167	E. Montanaro Gallitelli. 1973. Ricerche eseguite negli anni 1941-1942 sopra i Coralli delle scogliere emerse di Massaua e Gibuti [Research done between 1941 and 1942 on emersed coral reefs of Massawa and Djibouti]. Missione Geologica dell'Azienda Generale Italiana Petroli (AGIP) nella Dancalia Meridionale e sugli Altipiani Hararini (1936-1938) 4(2):446-519
Lobophyllia corymbosa	124.258	24.5042	H. L. Foster. 1965. Geology of Ishigaki-shima Ryukyu-retto. United States Geological Survey Professional Paper 399(A):1-119
Lobophyllia corymbosa	35.4667	27.6833	W-C. Dullo. 1990. Facies, Fossil Record, and Age of Pleistocene Reefs from the Red Sea (Saudi Arabia). Facies 22:1-46
Lobophyllia corymbosa	34.2253	27.7886	H. Mewis. 2011. Field work Sinai.
Lobophyllia corymbosa	34.2253	27.7889	H. Mewis. 2011. Field work Sinai.
Lobophyllia corymbosa	33.5	27.9333	A. S. El-Sorogy. 2002. Paleontology and depositional environments of the Pleistocene coral reefs of the Gulf of Suez, Egypt. Neues Jahrbuch fÃ¼r Geologie und PalÃ¤ontologie, Abhandlungen 225(3):337-371
Lobophyllia corymbosa	34.5339	28.5681	H. Mewis. 2011. Field work Sinai.
Lobophyllia hemprichii	168.255	-17.5772	H. Mewis. 2011. Field work Vanuatu.
Lobophyllia hemprichii	39.5833	-4.28333	J. A. Crame. 1981. Ecological stratification in the Pleistocene coral reefs of the Kenya coast. Palaeontology 24(3):609-646
Lobophyllia hemprichii	34.035	26.555	L. R. Casazza. 2012. Symbiosis in the Fossil Record: Eocene Nummulites and Pleistocene Reefs of Egypt.
Lobophyllia hemprichii	35.4667	27.6833	W-C. Dullo. 1990. Facies, Fossil Record, and Age of Pleistocene Reefs from the Red Sea (Saudi Arabia). Facies 22:1-46
Lobophyllia hemprichii	34.5208	28.5553	H. Mewis. 2011. Field work Sinai.
Madracis decactis	-81.4	19.3667	I. G. Hunter and B. Jones. 1996. Coral associations of the Pleistocene Ironshore Formation, Grand Cayman. Coral Reefs 15(4):249-267
Manicina areolata	-88	17	E. Gischler. 2007. Pleistocene facies of Belize barrier and atoll reefs. Facies 53(1):27-41
Manicina areolata	-76.3167	17.8667	S. F. Mitchell, R. K. Pickerill, and T. A. Stemann. 2001. The Port Morant Formation (Upper Pleistocene, Jamaica): high resolution sedimentology and paleoenvironmental analysis of a mixed carbonate clastic lagoonal succession. Sedimentary Geology 144:291-306
Manicina areolata	-81.3667	19.2667	I. G. Hunter and B. Jones. 1996. Coral associations of the Pleistocene Ironshore Formation, Grand Cayman. Coral Reefs 15(4):249-267
Manicina areolata	-81.3833	19.2667	I. G. Hunter and B. Jones. 1996. Coral associations of the Pleistocene Ironshore Formation, Grand Cayman. Coral Reefs 15(4):249-267
Manicina areolata	-81.3333	19.2833	I. G. Hunter and B. Jones. 1996. Coral associations of the Pleistocene Ironshore Formation, Grand Cayman. Coral Reefs 15(4):249-267
Manicina areolata	-81.3833	19.2833	I. G. Hunter and B. Jones. 1996. Coral associations of the Pleistocene Ironshore Formation, Grand Cayman. Coral Reefs 15(4):249-267
Manicina areolata	-81.2	19.3	I. G. Hunter and B. Jones. 1996. Coral associations of the Pleistocene Ironshore Formation, Grand Cayman. Coral Reefs 15(4):249-267
Manicina areolata	-81.3333	19.3	I. G. Hunter and B. Jones. 1996. Coral associations of the Pleistocene Ironshore Formation, Grand Cayman. Coral Reefs 15(4):249-267
Manicina areolata	-81.3667	19.3	I. G. Hunter and B. Jones. 1996. Coral associations of the Pleistocene Ironshore Formation, Grand Cayman. Coral Reefs 15(4):249-267
Manicina areolata	-81.3667	19.3167	I. G. Hunter and B. Jones. 1996. Coral associations of the Pleistocene Ironshore Formation, Grand Cayman. Coral Reefs 15(4):249-267
Manicina areolata	-81.3667	19.35	I. G. Hunter and B. Jones. 1996. Coral associations of the Pleistocene Ironshore Formation, Grand Cayman. Coral Reefs 15(4):249-267
Manicina areolata	-81.3833	19.3667	I. G. Hunter and B. Jones. 1996. Coral associations of the Pleistocene Ironshore Formation, Grand Cayman. Coral Reefs 15(4):249-267
Manicina areolata	-81.3667	19.3667	I. G. Hunter and B. Jones. 1996. Coral associations of the Pleistocene Ironshore Formation, Grand Cayman. Coral Reefs 15(4):249-267
Manicina areolata	-81.4167	19.3667	I. G. Hunter and B. Jones. 1996. Coral associations of the Pleistocene Ironshore Formation, Grand Cayman. Coral Reefs 15(4):249-267
Manicina areolata	-81.4	19.3667	I. G. Hunter and B. Jones. 1996. Coral associations of the Pleistocene Ironshore Formation, Grand Cayman. Coral Reefs 15(4):249-267
Manicina areolata	-81.3667	19.3833	I. G. Hunter and B. Jones. 1996. Coral associations of the Pleistocene Ironshore Formation, Grand Cayman. Coral Reefs 15(4):249-267
Manicina areolata	-81.4	19.3833	I. G. Hunter and B. Jones. 1996. Coral associations of the Pleistocene Ironshore Formation, Grand Cayman. Coral Reefs 15(4):249-267
Manicina areolata	-81.3833	19.3833	I. G. Hunter and B. Jones. 1996. Coral associations of the Pleistocene Ironshore Formation, Grand Cayman. Coral Reefs 15(4):249-267
Manicina areolata	-73.6833	21.0167	A. F. Budd and J. M. Pandolfi. 2004. Overlapping species boundaries and hybridization within the Montastrea "annularis" reef coral complex in the Pleistocene of the Bahama Islands. Paleobiology 30(3):396-425
Manicina areolata	-74.5167	24.0833	A. F. Budd and J. M. Pandolfi. 2004. Overlapping species boundaries and hybridization within the Montastrea "annularis" reef coral complex in the Pleistocene of the Bahama Islands. Paleobiology 30(3):396-425
Manicina areolata	-81.5667	24.6667	N. E. Weisbord. 1974. Late Cenozoic corals of south Florida. Bulletins of American Paleontology 66(285):259-544
Meandrina meandrites	-69.1333	12.3	J. M. Pandolfi. 2001. Community structure of Pleistocene coral reefs of Curacao, Netherlands Antilles. Ecological Monographs 71(1):49-67
Meandrina meandrites	-81.7167	12.5	J. M. Pandolfi and J. B. C. Jackson. 2007. Broad-scale patterns in Pleistocene coral reef communities from the Caribbean: implications for ecology and management. In R. B. Aronson (ed.), Geological approaches to coral reef ecology. Ecological Studies 192:201-236
Meandrina meandrites	-81.7167	12.5667	J. M. Pandolfi and J. B. C. Jackson. 2007. Broad-scale patterns in Pleistocene coral reef communities from the Caribbean: implications for ecology and management. In R. B. Aronson (ed.), Geological approaches to coral reef ecology. Ecological Studies 192:201-236
Meandrina meandrites	-81.3833	19.2667	I. G. Hunter and B. Jones. 1996. Coral associations of the Pleistocene Ironshore Formation, Grand Cayman. Coral Reefs 15(4):249-267
Meandrina meandrites	-81.4167	19.3667	I. G. Hunter and B. Jones. 1996. Coral associations of the Pleistocene Ironshore Formation, Grand Cayman. Coral Reefs 15(4):249-267
Meandrina meandrites	-81.4	19.3667	I. G. Hunter and B. Jones. 1996. Coral associations of the Pleistocene Ironshore Formation, Grand Cayman. Coral Reefs 15(4):249-267
Meandrina meandrites	-81.4	19.3833	I. G. Hunter and B. Jones. 1996. Coral associations of the Pleistocene Ironshore Formation, Grand Cayman. Coral Reefs 15(4):249-267
Meandrina meandrites	-81.3833	19.3833	I. G. Hunter and B. Jones. 1996. Coral associations of the Pleistocene Ironshore Formation, Grand Cayman. Coral Reefs 15(4):249-267
Meandrina meandrites	-87.1208	20.5778	E. JordÃ¡n-Dahlgren. 1997. A Caribbean coral reef community of the Pleistocene. Proceedings of the 8th International Coral Reef Symposium 2:1681-1686
Meandrina meandrites	-81.5667	24.6667	W. Kiessling, C. Simpson, and B. Beck, J. Pandolfi. 2011. Taxonomic vetting of Pleistocene coral occurrence data.
Montastraea cavernosa	-64.6167	11.85	C. Schubert. 1997. Pleistocene marine terraces of la Blanquilla island, Venezuela, and their diagenesis. Proceedings, Third International Coral Reef Symposium 2:149-154
Montastraea cavernosa	-59.5333	13.0667	G. Schellmann and U. Radtke. 2004. A revised morpho- and chronostratigraphy of the Late and Middle\r\nPleistocene coral reef terraces on Southern Barbados (West Indies). Earth-Science Reviews 64:157-187
Montastraea cavernosa	-76.3167	17.8667	S. F. Mitchell, R. K. Pickerill, and T. A. Stemann. 2001. The Port Morant Formation (Upper Pleistocene, Jamaica): high resolution sedimentology and paleoenvironmental analysis of a mixed carbonate clastic lagoonal succession. Sedimentary Geology 144:291-306
Montastraea cavernosa	-76.333	17.8687	J. S. H. Collins, S. K. Donovan, and T. A. Stemann. 2009. Fossil Crustacea of the Late Pleistocene Port Morant Formation, west Port Morant Harbour, southeastern Jamaica. Scripta Geologica 138:23-53
Montastraea cavernosa	-76.3167	17.8833	S. A. James. 2006. Coral Biodiversity and Zonation on a Pleistocene Reef, Southeastern Jamaica. Jamaica Clearing House Mechanism
Montastraea cavernosa	-87.8167	18.1167	S. J. Mazzullo. 2006. Late Pliocene to Holocene platform evolution in northern Belize, and comparison with coeval deposits in southern Belize and the Bahamas. Sedimentology 53:1015-1047
Montastraea cavernosa	-69.5167	18.4167	J. S. Klaus and A. F. Budd. 2003. Comparison of Caribbean coral reef communities before and after Plio-Pleistocene faunal turnover: Analyses of two Dominican Republic reef sequences. Palaios 18(1):3-21
Montastraea cavernosa	-77.3333	18.5	S. K. Boss and W. D. Liddell. 1987. Back-reef and Fore-reef Analogs in the Pleistocene of North Jamaica: Implications for Facies Recognition and Sediment Flux in Fossil reefs. Palaios 2:219-228
Montastraea cavernosa	-81.3833	19.2667	I. G. Hunter and B. Jones. 1996. Coral associations of the Pleistocene Ironshore Formation, Grand Cayman. Coral Reefs 15(4):249-267
Montastraea cavernosa	-81.3333	19.2667	I. G. Hunter and B. Jones. 1996. Coral associations of the Pleistocene Ironshore Formation, Grand Cayman. Coral Reefs 15(4):249-267
Montastraea cavernosa	-81.3833	19.2833	I. G. Hunter and B. Jones. 1996. Coral associations of the Pleistocene Ironshore Formation, Grand Cayman. Coral Reefs 15(4):249-267
Montastraea cavernosa	-81.15	19.2833	I. G. Hunter and B. Jones. 1996. Coral associations of the Pleistocene Ironshore Formation, Grand Cayman. Coral Reefs 15(4):249-267
Montastraea cavernosa	-81.3667	19.3167	I. G. Hunter and B. Jones. 1996. Coral associations of the Pleistocene Ironshore Formation, Grand Cayman. Coral Reefs 15(4):249-267
Montastraea cavernosa	-81.3667	19.35	I. G. Hunter and B. Jones. 1996. Coral associations of the Pleistocene Ironshore Formation, Grand Cayman. Coral Reefs 15(4):249-267
Montastraea cavernosa	-81.0833	19.35	I. G. Hunter and B. Jones. 1996. Coral associations of the Pleistocene Ironshore Formation, Grand Cayman. Coral Reefs 15(4):249-267
Montastraea cavernosa	-81.3667	19.3667	I. G. Hunter and B. Jones. 1996. Coral associations of the Pleistocene Ironshore Formation, Grand Cayman. Coral Reefs 15(4):249-267
Montastraea cavernosa	-81.3833	19.3667	I. G. Hunter and B. Jones. 1996. Coral associations of the Pleistocene Ironshore Formation, Grand Cayman. Coral Reefs 15(4):249-267
Montastraea cavernosa	-81.4	19.3667	I. G. Hunter and B. Jones. 1996. Coral associations of the Pleistocene Ironshore Formation, Grand Cayman. Coral Reefs 15(4):249-267
Montastraea cavernosa	-81.4	19.3833	I. G. Hunter and B. Jones. 1996. Coral associations of the Pleistocene Ironshore Formation, Grand Cayman. Coral Reefs 15(4):249-267
Montastraea cavernosa	-81.3833	19.3833	I. G. Hunter and B. Jones. 1996. Coral associations of the Pleistocene Ironshore Formation, Grand Cayman. Coral Reefs 15(4):249-267
Montastraea cavernosa	-80.1	19.65	D. R. Stoddart. 1980. Geology and geomorphology of Little Cayman. Atoll Research Bulletin 241:11-16
Montastraea cavernosa	-87.1208	20.5778	E. JordÃ¡n-Dahlgren. 1997. A Caribbean coral reef community of the Pleistocene. Proceedings of the 8th International Coral Reef Symposium 2:1681-1686
Montastraea cavernosa	-73.6833	21.0167	A. F. Budd and J. M. Pandolfi. 2004. Overlapping species boundaries and hybridization within the Montastrea "annularis" reef coral complex in the Pleistocene of the Bahama Islands. Paleobiology 30(3):396-425
Montastraea cavernosa	-74.5333	24.05	A. F. Budd and J. M. Pandolfi. 2004. Overlapping species boundaries and hybridization within the Montastrea "annularis" reef coral complex in the Pleistocene of the Bahama Islands. Paleobiology 30(3):396-425
Montastraea cavernosa	-81.5667	24.6667	N. E. Weisbord. 1974. Late Cenozoic corals of south Florida. Bulletins of American Paleontology 66(285):259-544
Montastraea cavernosa	-80.3833	25.1333	B. J. Greenstein, H. A. Curran, and J. M. Pandolfi. 1998. Shifting ecological baselines and the demise of Acropora cervicornis in the western North Atlantic and Caribbean Province: a Pleistocene perspective. Coral Reefs 17:249-261
Montastraea cavernosa	-80.35	25.1833	D. R. Muhs, K. R. Simmons, and R. R. Schumann, R. B. Halley. 2011. Sea-level history of the past two interglacial periods: new evidence from U-series dating of reef corals from south Florida. Quaternary Science Reviews 30:570-590
Montastraea cavernosa	-64.7667	32.2667	D. R. Muhs, K. R. Simmons, and B. Steinke. 2002. Timing and warmth of the Last Interglacial period: new U-series evidence from Hawaii and Bermuda and a new fossil compilation for North America. Quaternary Science Reviews 21:1355-1383
Montipora angulata	69	22.4167	D. K. Pandey and R. Singh. 2010. Early Pliocene - Holocene Favia from the northern and northwestern coastal areas of Saurashtra Peninsula, western India. Journal of the Palaeontological Society of India 55(2):107-120
Montipora capricornis	69	22.4167	D. K. Pandey and R. Singh. 2010. Early Pliocene - Holocene Favia from the northern and northwestern coastal areas of Saurashtra Peninsula, western India. Journal of the Palaeontological Society of India 55(2):107-120
Montipora spongiosa	33.5833	27.65	A. S. El-Sorogy. 2002. Paleontology and depositional environments of the Pleistocene coral reefs of the Gulf of Suez, Egypt. Neues Jahrbuch fÃ¼r Geologie und PalÃ¤ontologie, Abhandlungen 225(3):337-371
Mussa angulosa	-76.3167	17.8667	S. F. Mitchell, R. K. Pickerill, and T. A. Stemann. 2001. The Port Morant Formation (Upper Pleistocene, Jamaica): high resolution sedimentology and paleoenvironmental analysis of a mixed carbonate clastic lagoonal succession. Sedimentary Geology 144:291-306
Mussa angulosa	-81.3833	19.3833	I. G. Hunter and B. Jones. 1996. Coral associations of the Pleistocene Ironshore Formation, Grand Cayman. Coral Reefs 15(4):249-267
Mussa angulosa	-87.1208	20.5778	E. JordÃ¡n-Dahlgren. 1997. A Caribbean coral reef community of the Pleistocene. Proceedings of the 8th International Coral Reef Symposium 2:1681-1686
Mussa angulosa	-74.55	23.95	D. E. Hattin and V. L. Warren. 1989. Stratigraphic analysis of a fossil Neogoniolithon-capped patch reef and associated facies, San Salvador, Bahamas. Coral Reefs (8):19-30
Mussa angulosa	-81.5667	24.6667	N. E. Weisbord. 1974. Late Cenozoic corals of south Florida. Bulletins of American Paleontology 66(285):259-544
Mycedium elephantotus	153.367	-29.1	J. Pickett. 1981. A Late Pleistocene coral fauna from Evans Head, N.S.W. Alcheringa 5:71-83
Mycedium elephantotus	35.4667	27.6833	W-C. Dullo. 1990. Facies, Fossil Record, and Age of Pleistocene Reefs from the Red Sea (Saudi Arabia). Facies 22:1-46
Mycetophyllia ferox	-76.3167	17.8667	S. F. Mitchell, R. K. Pickerill, and T. A. Stemann. 2001. The Port Morant Formation (Upper Pleistocene, Jamaica): high resolution sedimentology and paleoenvironmental analysis of a mixed carbonate clastic lagoonal succession. Sedimentary Geology 144:291-306
Mycetophyllia lamarckiana	-76.3167	17.8667	S. F. Mitchell, R. K. Pickerill, and T. A. Stemann. 2001. The Port Morant Formation (Upper Pleistocene, Jamaica): high resolution sedimentology and paleoenvironmental analysis of a mixed carbonate clastic lagoonal succession. Sedimentary Geology 144:291-306
Mycetophyllia lamarckiana	-74.5167	24.0333	B. J. Greenstein, L. A. Harris, and H. A. Curran. 1998. Comparison of recent coral life and death assemblages to Pleistocene reef communities: implications for rapid faunal replacement on recent reefs. Carbonates and Evaporites 13(1):23-31
Mycetophyllia lamarckiana	-81.5667	24.6667	N. E. Weisbord. 1974. Late Cenozoic corals of south Florida. Bulletins of American Paleontology 66(285):259-544
Orbicella annularis	43.15	11.6	E. Montanaro Gallitelli. 1973. Ricerche eseguite negli anni 1941-1942 sopra i Coralli delle scogliere emerse di Massaua e Gibuti [Research done between 1941 and 1942 on emersed coral reefs of Massawa and Djibouti]. Missione Geologica dell'Azienda Generale Italiana Petroli (AGIP) nella Dancalia Meridionale e sugli Altipiani Hararini (1936-1938) 4(2):446-519
Orbicella annularis	-64.6167	11.85	C. Schubert. 1997. Pleistocene marine terraces of la Blanquilla island, Venezuela, and their diagenesis. Proceedings, Third International Coral Reef Symposium 2:149-154
Orbicella annularis	-68.9833	12.1333	J. M. Pandolfi. 2001. Community structure of Pleistocene coral reefs of Curacao, Netherlands Antilles. Ecological Monographs 71(1):49-67
Orbicella annularis	-68.8833	12.1667	J. M. Pandolfi. 2001. Community structure of Pleistocene coral reefs of Curacao, Netherlands Antilles. Ecological Monographs 71(1):49-67
Orbicella annularis	-69.0833	12.2	J. M. Pandolfi. 2001. Community structure of Pleistocene coral reefs of Curacao, Netherlands Antilles. Ecological Monographs 71(1):49-67
Orbicella annularis	-69.0167	12.2333	J. M. Pandolfi. 2001. Community structure of Pleistocene coral reefs of Curacao, Netherlands Antilles. Ecological Monographs 71(1):49-67
Orbicella annularis	-69.0667	12.2833	J. M. Pandolfi, G. Llewellyn, and J. B. C. Jackson. 1999. Pleistocene reef environments, constituent grains, and coral community structure: Curacao, Netherlands Antilles. Coral Reefs 18:107-122
Orbicella annularis	-69.1333	12.3	J. M. Pandolfi. 2001. Community structure of Pleistocene coral reefs of Curacao, Netherlands Antilles. Ecological Monographs 71(1):49-67
Orbicella annularis	-69.1	12.3667	J. M. Pandolfi. 2001. Community structure of Pleistocene coral reefs of Curacao, Netherlands Antilles. Ecological Monographs 71(1):49-67
Orbicella annularis	-81.7167	12.5	J. M. Pandolfi and J. B. C. Jackson. 2007. Broad-scale patterns in Pleistocene coral reef communities from the Caribbean: implications for ecology and management. In R. B. Aronson (ed.), Geological approaches to coral reef ecology. Ecological Studies 192:201-236
Orbicella annularis	-81.7	12.5	J. M. Pandolfi and J. B. C. Jackson. 2007. Broad-scale patterns in Pleistocene coral reef communities from the Caribbean: implications for ecology and management. In R. B. Aronson (ed.), Geological approaches to coral reef ecology. Ecological Studies 192:201-236
Orbicella annularis	-81.7	12.5333	J. M. Pandolfi and J. B. C. Jackson. 2007. Broad-scale patterns in Pleistocene coral reef communities from the Caribbean: implications for ecology and management. In R. B. Aronson (ed.), Geological approaches to coral reef ecology. Ecological Studies 192:201-236
Orbicella annularis	-81.7167	12.5667	J. M. Pandolfi and J. B. C. Jackson. 2007. Broad-scale patterns in Pleistocene coral reef communities from the Caribbean: implications for ecology and management. In R. B. Aronson (ed.), Geological approaches to coral reef ecology. Ecological Studies 192:201-236
Orbicella annularis	-59.5333	13.0667	G. Schellmann and U. Radtke. 2004. A revised morpho- and chronostratigraphy of the Late and Middle\r\nPleistocene coral reef terraces on Southern Barbados (West Indies). Earth-Science Reviews 64:157-187
Orbicella annularis	-81.3667	13.35	J. M. Pandolfi and J. B. C. Jackson. 2007. Broad-scale patterns in Pleistocene coral reef communities from the Caribbean: implications for ecology and management. In R. B. Aronson (ed.), Geological approaches to coral reef ecology. Ecological Studies 192:201-236
Orbicella annularis	39.4667	15.6167	E. Montanaro Gallitelli. 1973. Ricerche eseguite negli anni 1941-1942 sopra i Coralli delle scogliere emerse di Massaua e Gibuti [Research done between 1941 and 1942 on emersed coral reefs of Massawa and Djibouti]. Missione Geologica dell'Azienda Generale Italiana Petroli (AGIP) nella Dancalia Meridionale e sugli Altipiani Hararini (1936-1938) 4(2):446-519
Orbicella annularis	-64.6	17.75	M. A. Toscano, I. G. Macintyre, and J. Lundberg. 2012. Last interglacial reef limestones, northeastern St. Croix, US Virgin Islands â€” evidence of tectonic tilting and subsidence since MIS 5.5. Coral Reefs 31(1):27-38
Orbicella annularis	-64.7	17.75	M. A. Toscano, I. G. Macintyre, and J. Lundberg. 2012. Last interglacial reef limestones, northeastern St. Croix, US Virgin Islands â€” evidence of tectonic tilting and subsidence since MIS 5.5. Coral Reefs 31(1):27-38
Orbicella annularis	-76.3167	17.8667	S. F. Mitchell, R. K. Pickerill, and T. A. Stemann. 2001. The Port Morant Formation (Upper Pleistocene, Jamaica): high resolution sedimentology and paleoenvironmental analysis of a mixed carbonate clastic lagoonal succession. Sedimentary Geology 144:291-306
Orbicella annularis	-76.3167	17.8833	S. A. James. 2006. Coral Biodiversity and Zonation on a Pleistocene Reef, Southeastern Jamaica. Jamaica Clearing House Mechanism
Orbicella annularis	-87.9	18	S. J. Mazzullo. 2006. Late Pliocene to Holocene platform evolution in northern Belize, and comparison with coeval deposits in southern Belize and the Bahamas. Sedimentology 53:1015-1047
Orbicella annularis	-87.8167	18.1167	S. J. Mazzullo. 2006. Late Pliocene to Holocene platform evolution in northern Belize, and comparison with coeval deposits in southern Belize and the Bahamas. Sedimentology 53:1015-1047
Orbicella annularis	-69.5167	18.4167	J. S. Klaus and A. F. Budd. 2003. Comparison of Caribbean coral reef communities before and after Plio-Pleistocene faunal turnover: Analyses of two Dominican Republic reef sequences. Palaios 18(1):3-21
Orbicella annularis	-77.3333	18.5	S. K. Boss and W. D. Liddell. 1987. Back-reef and Fore-reef Analogs in the Pleistocene of North Jamaica: Implications for Facies Recognition and Sediment Flux in Fossil reefs. Palaios 2:219-228
Orbicella annularis	-81.3833	19.2667	I. G. Hunter and B. Jones. 1996. Coral associations of the Pleistocene Ironshore Formation, Grand Cayman. Coral Reefs 15(4):249-267
Orbicella annularis	-81.3667	19.2667	I. G. Hunter and B. Jones. 1996. Coral associations of the Pleistocene Ironshore Formation, Grand Cayman. Coral Reefs 15(4):249-267
Orbicella annularis	-81.3333	19.2667	I. G. Hunter and B. Jones. 1996. Coral associations of the Pleistocene Ironshore Formation, Grand Cayman. Coral Reefs 15(4):249-267
Orbicella annularis	-81.35	19.2833	I. G. Hunter and B. Jones. 1996. Coral associations of the Pleistocene Ironshore Formation, Grand Cayman. Coral Reefs 15(4):249-267
Orbicella annularis	-81.3333	19.2833	I. G. Hunter and B. Jones. 1996. Coral associations of the Pleistocene Ironshore Formation, Grand Cayman. Coral Reefs 15(4):249-267
Orbicella annularis	-81.3833	19.2833	I. G. Hunter and B. Jones. 1996. Coral associations of the Pleistocene Ironshore Formation, Grand Cayman. Coral Reefs 15(4):249-267
Orbicella annularis	-81.15	19.2833	I. G. Hunter and B. Jones. 1996. Coral associations of the Pleistocene Ironshore Formation, Grand Cayman. Coral Reefs 15(4):249-267
Orbicella annularis	-81.2	19.3	I. G. Hunter and B. Jones. 1996. Coral associations of the Pleistocene Ironshore Formation, Grand Cayman. Coral Reefs 15(4):249-267
Orbicella annularis	-81.3333	19.3	I. G. Hunter and B. Jones. 1996. Coral associations of the Pleistocene Ironshore Formation, Grand Cayman. Coral Reefs 15(4):249-267
Orbicella annularis	-81.3667	19.3	I. G. Hunter and B. Jones. 1996. Coral associations of the Pleistocene Ironshore Formation, Grand Cayman. Coral Reefs 15(4):249-267
Orbicella annularis	-81.3667	19.3167	I. G. Hunter and B. Jones. 1996. Coral associations of the Pleistocene Ironshore Formation, Grand Cayman. Coral Reefs 15(4):249-267
Orbicella annularis	-81.3667	19.35	I. G. Hunter and B. Jones. 1996. Coral associations of the Pleistocene Ironshore Formation, Grand Cayman. Coral Reefs 15(4):249-267
Orbicella annularis	-81.0833	19.35	I. G. Hunter and B. Jones. 1996. Coral associations of the Pleistocene Ironshore Formation, Grand Cayman. Coral Reefs 15(4):249-267
Orbicella annularis	-81.3833	19.3667	I. G. Hunter and B. Jones. 1996. Coral associations of the Pleistocene Ironshore Formation, Grand Cayman. Coral Reefs 15(4):249-267
Orbicella annularis	-81.3667	19.3667	I. G. Hunter and B. Jones. 1996. Coral associations of the Pleistocene Ironshore Formation, Grand Cayman. Coral Reefs 15(4):249-267
Orbicella annularis	-81.4	19.3667	I. G. Hunter and B. Jones. 1996. Coral associations of the Pleistocene Ironshore Formation, Grand Cayman. Coral Reefs 15(4):249-267
Orbicella annularis	-81.4167	19.3667	I. G. Hunter and B. Jones. 1996. Coral associations of the Pleistocene Ironshore Formation, Grand Cayman. Coral Reefs 15(4):249-267
Orbicella annularis	-81.3667	19.3833	I. G. Hunter and B. Jones. 1996. Coral associations of the Pleistocene Ironshore Formation, Grand Cayman. Coral Reefs 15(4):249-267
Orbicella annularis	-81.4	19.3833	I. G. Hunter and B. Jones. 1996. Coral associations of the Pleistocene Ironshore Formation, Grand Cayman. Coral Reefs 15(4):249-267
Orbicella annularis	-81.3833	19.3833	I. G. Hunter and B. Jones. 1996. Coral associations of the Pleistocene Ironshore Formation, Grand Cayman. Coral Reefs 15(4):249-267
Orbicella annularis	-80.1	19.65	D. R. Stoddart. 1980. Geology and geomorphology of Little Cayman. Atoll Research Bulletin 241:11-16
Orbicella annularis	-87.1208	20.5778	E. JordÃ¡n-Dahlgren. 1997. A Caribbean coral reef community of the Pleistocene. Proceedings of the 8th International Coral Reef Symposium 2:1681-1686
Orbicella annularis	-73.7167	21.0167	J. H. Chen, H. A. Curren, and B. White, G. J. Wasserburg. 1991. Precise chronology of the last interglacial period: 234U-230Th data from fossil coral reefs in the Bahamas. Geological Society America Bulletin 103:82-97
Orbicella annularis	-73.6833	21.0167	A. F. Budd and J. M. Pandolfi. 2004. Overlapping species boundaries and hybridization within the Montastrea "annularis" reef coral complex in the Pleistocene of the Bahama Islands. Paleobiology 30(3):396-425
Orbicella annularis	-74.55	23.95	D. E. Hattin and V. L. Warren. 1989. Stratigraphic analysis of a fossil Neogoniolithon-capped patch reef and associated facies, San Salvador, Bahamas. Coral Reefs (8):19-30
Orbicella annularis	-74.5167	24.0333	B. J. Greenstein, L. A. Harris, and H. A. Curran. 1998. Comparison of recent coral life and death assemblages to Pleistocene reef communities: implications for rapid faunal replacement on recent reefs. Carbonates and Evaporites 13(1):23-31
Orbicella annularis	-74.5333	24.05	A. F. Budd and J. M. Pandolfi. 2004. Overlapping species boundaries and hybridization within the Montastrea "annularis" reef coral complex in the Pleistocene of the Bahama Islands. Paleobiology 30(3):396-425
Orbicella annularis	-74.5167	24.0833	A. F. Budd and J. M. Pandolfi. 2004. Overlapping species boundaries and hybridization within the Montastrea "annularis" reef coral complex in the Pleistocene of the Bahama Islands. Paleobiology 30(3):396-425
Orbicella annularis	-81.5667	24.6667	N. E. Weisbord. 1974. Late Cenozoic corals of south Florida. Bulletins of American Paleontology 66(285):259-544
Orbicella annularis	-81.5831	24.6672	G. Multer, E. Gischler, and J. Lundberg, K. R. Simmons, E. A. Shinn. 2002. Key Largo Limestone Revisited: Pleistocene Shelf-edge Facies, Florida Keys, USA. Facies 46:229-272
Orbicella annularis	-80.9667	24.7333	D. R. Muhs, K. R. Simmons, and R. R. Schumann, R. B. Halley. 2011. Sea-level history of the past two interglacial periods: new evidence from U-series dating of reef corals from south Florida. Quaternary Science Reviews 30:570-590
Orbicella annularis	-80.95	24.75	D. R. Muhs, K. R. Simmons, and R. R. Schumann, R. B. Halley. 2011. Sea-level history of the past two interglacial periods: new evidence from U-series dating of reef corals from south Florida. Quaternary Science Reviews 30:570-590
Orbicella annularis	-80.5833	24.9333	B. J. Greenstein, H. A. Curran, and J. M. Pandolfi. 1998. Shifting ecological baselines and the demise of Acropora cervicornis in the western North Atlantic and Caribbean Province: a Pleistocene perspective. Coral Reefs 17:249-261
Orbicella annularis	-80.6	24.9333	D. R. Muhs, K. R. Simmons, and R. R. Schumann, R. B. Halley. 2011. Sea-level history of the past two interglacial periods: new evidence from U-series dating of reef corals from south Florida. Quaternary Science Reviews 30:570-590
Orbicella annularis	-77.9333	24.9833	A. F. Budd and J. M. Pandolfi. 2004. Overlapping species boundaries and hybridization within the Montastrea "annularis" reef coral complex in the Pleistocene of the Bahama Islands. Paleobiology 30(3):396-425
Orbicella annularis	-78	25.1333	A. F. Budd and J. M. Pandolfi. 2004. Overlapping species boundaries and hybridization within the Montastrea "annularis" reef coral complex in the Pleistocene of the Bahama Islands. Paleobiology 30(3):396-425
Orbicella annularis	-80.3833	25.1333	B. J. Greenstein, H. A. Curran, and J. M. Pandolfi. 1998. Shifting ecological baselines and the demise of Acropora cervicornis in the western North Atlantic and Caribbean Province: a Pleistocene perspective. Coral Reefs 17:249-261
Orbicella annularis	-80.3667	25.1667	D. R. Muhs, K. R. Simmons, and R. R. Schumann, R. B. Halley. 2011. Sea-level history of the past two interglacial periods: new evidence from U-series dating of reef corals from south Florida. Quaternary Science Reviews 30:570-590
Orbicella annularis	-80.35	25.1667	D. R. Muhs, K. R. Simmons, and R. R. Schumann, R. B. Halley. 2011. Sea-level history of the past two interglacial periods: new evidence from U-series dating of reef corals from south Florida. Quaternary Science Reviews 30:570-590
Orbicella annularis	-80.35	25.1833	D. R. Muhs, K. R. Simmons, and R. R. Schumann, R. B. Halley. 2011. Sea-level history of the past two interglacial periods: new evidence from U-series dating of reef corals from south Florida. Quaternary Science Reviews 30:570-590
Orbicella faveolata	-68.9833	12.1333	J. M. Pandolfi. 2001. Community structure of Pleistocene coral reefs of Curacao, Netherlands Antilles. Ecological Monographs 71(1):49-67
Orbicella faveolata	-68.8833	12.1667	J. M. Pandolfi. 2001. Community structure of Pleistocene coral reefs of Curacao, Netherlands Antilles. Ecological Monographs 71(1):49-67
Orbicella faveolata	-69.0833	12.2	J. M. Pandolfi. 2001. Community structure of Pleistocene coral reefs of Curacao, Netherlands Antilles. Ecological Monographs 71(1):49-67
Orbicella faveolata	-69.0167	12.2333	J. M. Pandolfi. 2001. Community structure of Pleistocene coral reefs of Curacao, Netherlands Antilles. Ecological Monographs 71(1):49-67
Orbicella faveolata	-69.0667	12.2833	J. M. Pandolfi, G. Llewellyn, and J. B. C. Jackson. 1999. Pleistocene reef environments, constituent grains, and coral community structure: Curacao, Netherlands Antilles. Coral Reefs 18:107-122
Orbicella faveolata	-69.1333	12.3	J. M. Pandolfi. 2001. Community structure of Pleistocene coral reefs of Curacao, Netherlands Antilles. Ecological Monographs 71(1):49-67
Orbicella faveolata	-69.1	12.3667	J. M. Pandolfi. 2001. Community structure of Pleistocene coral reefs of Curacao, Netherlands Antilles. Ecological Monographs 71(1):49-67
Orbicella faveolata	-81.7167	12.5	J. M. Pandolfi and J. B. C. Jackson. 2007. Broad-scale patterns in Pleistocene coral reef communities from the Caribbean: implications for ecology and management. In R. B. Aronson (ed.), Geological approaches to coral reef ecology. Ecological Studies 192:201-236
Orbicella faveolata	-81.7	12.5	J. M. Pandolfi and J. B. C. Jackson. 2007. Broad-scale patterns in Pleistocene coral reef communities from the Caribbean: implications for ecology and management. In R. B. Aronson (ed.), Geological approaches to coral reef ecology. Ecological Studies 192:201-236
Orbicella faveolata	-81.7	12.5333	J. M. Pandolfi and J. B. C. Jackson. 2007. Broad-scale patterns in Pleistocene coral reef communities from the Caribbean: implications for ecology and management. In R. B. Aronson (ed.), Geological approaches to coral reef ecology. Ecological Studies 192:201-236
Orbicella faveolata	-81.7167	12.5667	J. M. Pandolfi and J. B. C. Jackson. 2007. Broad-scale patterns in Pleistocene coral reef communities from the Caribbean: implications for ecology and management. In R. B. Aronson (ed.), Geological approaches to coral reef ecology. Ecological Studies 192:201-236
Orbicella faveolata	-81.3667	13.35	J. M. Pandolfi and J. B. C. Jackson. 2007. Broad-scale patterns in Pleistocene coral reef communities from the Caribbean: implications for ecology and management. In R. B. Aronson (ed.), Geological approaches to coral reef ecology. Ecological Studies 192:201-236
Orbicella faveolata	-76.3167	17.8667	S. F. Mitchell, R. K. Pickerill, and T. A. Stemann. 2001. The Port Morant Formation (Upper Pleistocene, Jamaica): high resolution sedimentology and paleoenvironmental analysis of a mixed carbonate clastic lagoonal succession. Sedimentary Geology 144:291-306
Orbicella faveolata	-69.5167	18.4167	J. S. Klaus and A. F. Budd. 2003. Comparison of Caribbean coral reef communities before and after Plio-Pleistocene faunal turnover: Analyses of two Dominican Republic reef sequences. Palaios 18(1):3-21
Orbicella faveolata	-73.6833	21.0167	A. F. Budd and J. M. Pandolfi. 2004. Overlapping species boundaries and hybridization within the Montastrea "annularis" reef coral complex in the Pleistocene of the Bahama Islands. Paleobiology 30(3):396-425
Orbicella faveolata	-74.5333	24.05	A. F. Budd and J. M. Pandolfi. 2004. Overlapping species boundaries and hybridization within the Montastrea "annularis" reef coral complex in the Pleistocene of the Bahama Islands. Paleobiology 30(3):396-425
Orbicella faveolata	-74.5167	24.0833	A. F. Budd and J. M. Pandolfi. 2004. Overlapping species boundaries and hybridization within the Montastrea "annularis" reef coral complex in the Pleistocene of the Bahama Islands. Paleobiology 30(3):396-425
Orbicella faveolata	-78	25.1333	A. F. Budd and J. M. Pandolfi. 2004. Overlapping species boundaries and hybridization within the Montastrea "annularis" reef coral complex in the Pleistocene of the Bahama Islands. Paleobiology 30(3):396-425
Orbicella franksi	-69.5167	18.4167	J. S. Klaus and A. F. Budd. 2003. Comparison of Caribbean coral reef communities before and after Plio-Pleistocene faunal turnover: Analyses of two Dominican Republic reef sequences. Palaios 18(1):3-21
Orbicella franksi	-87.1208	20.5778	E. JordÃ¡n-Dahlgren. 1997. A Caribbean coral reef community of the Pleistocene. Proceedings of the 8th International Coral Reef Symposium 2:1681-1686
Orbicella franksi	-73.6833	21.0167	A. F. Budd and J. M. Pandolfi. 2004. Overlapping species boundaries and hybridization within the Montastrea "annularis" reef coral complex in the Pleistocene of the Bahama Islands. Paleobiology 30(3):396-425
Orbicella franksi	-74.5333	24.05	A. F. Budd and J. M. Pandolfi. 2004. Overlapping species boundaries and hybridization within the Montastrea "annularis" reef coral complex in the Pleistocene of the Bahama Islands. Paleobiology 30(3):396-425
Pachyseris speciosa	39.4667	15.6167	E. Montanaro Gallitelli. 1973. Ricerche eseguite negli anni 1941-1942 sopra i Coralli delle scogliere emerse di Massaua e Gibuti [Research done between 1941 and 1942 on emersed coral reefs of Massawa and Djibouti]. Missione Geologica dell'Azienda Generale Italiana Petroli (AGIP) nella Dancalia Meridionale e sugli Altipiani Hararini (1936-1938) 4(2):446-519
Paragoniastrea australensis	115.517	-32	W. Kiessling, C. Simpson, and B. Beck, J. Pandolfi. 2011. Taxonomic vetting of Pleistocene coral occurrence data.
Paragoniastrea australensis	115.5	-32	B. J. Greenstein and J. M. Pandolfi. 2008. Escaping the heat: range shifts of reef coral taxa in coastal Western Australia. Global Change Biology 14:513-528
Paragoniastrea australensis	113.483	-24.4667	B. J. Greenstein and J. M. Pandolfi. 2008. Escaping the heat: range shifts of reef coral taxa in coastal Western Australia. Global Change Biology 14:513-528
Paragoniastrea australensis	113.383	-24.2167	B. J. Greenstein and J. M. Pandolfi. 2008. Escaping the heat: range shifts of reef coral taxa in coastal Western Australia. Global Change Biology 14:513-528
Paragoniastrea australensis	113.433	-24.0333	B. J. Greenstein and J. M. Pandolfi. 2008. Escaping the heat: range shifts of reef coral taxa in coastal Western Australia. Global Change Biology 14:513-528
Paragoniastrea australensis	114.217	-22.45	W. Kiessling, C. Simpson, and B. Beck, J. Pandolfi. 2011. Taxonomic vetting of Pleistocene coral occurrence data.
Paragoniastrea australensis	114.117	-21.8	W. Kiessling, C. Simpson, and B. Beck, J. Pandolfi. 2011. Taxonomic vetting of Pleistocene coral occurrence data.
Paragoniastrea australensis	43.15	11.6	E. Montanaro Gallitelli. 1973. Ricerche eseguite negli anni 1941-1942 sopra i Coralli delle scogliere emerse di Massaua e Gibuti [Research done between 1941 and 1942 on emersed coral reefs of Massawa and Djibouti]. Missione Geologica dell'Azienda Generale Italiana Petroli (AGIP) nella Dancalia Meridionale e sugli Altipiani Hararini (1936-1938) 4(2):446-519
Paramontastraea peresi	35.4667	27.6833	W-C. Dullo. 1990. Facies, Fossil Record, and Age of Pleistocene Reefs from the Red Sea (Saudi Arabia). Facies 22:1-46
Paramontastraea peresi	33.5	27.9333	A. S. El-Sorogy. 2002. Paleontology and depositional environments of the Pleistocene coral reefs of the Gulf of Suez, Egypt. Neues Jahrbuch fÃ¼r Geologie und PalÃ¤ontologie, Abhandlungen 225(3):337-371
Paramontastraea peresi	34.5303	28.5664	H. Mewis. 2011. Field work Sinai.
Pavona cactus	35.4667	27.6833	W-C. Dullo. 1990. Facies, Fossil Record, and Age of Pleistocene Reefs from the Red Sea (Saudi Arabia). Facies 22:1-46
Pavona cactus	34.5211	28.5556	H. Mewis. 2011. Field work Sinai.
Pavona clavus	-109.817	24.0333	R. A. Lopez-Perez. 2008. Fossil corals from the Gulf of California, Mexico: still a depauperate fauna but it bears more species than previously thought. Proceedings of the California Academy of Sciences, 4 59(12):503-519
Pavona clavus	-111.267	26.1	R. A. Lopez-Perez. 2008. Fossil corals from the Gulf of California, Mexico: still a depauperate fauna but it bears more species than previously thought. Proceedings of the California Academy of Sciences, 4 59(12):503-519
Pavona explanulata	35.4667	27.6833	W. Kiessling, C. Simpson, and B. Beck, J. Pandolfi. 2011. Taxonomic vetting of Pleistocene coral occurrence data.
Pavona frondifera	34.5208	28.5553	H. Mewis. 2011. Field work Sinai.
Pavona gigantea	-111.267	26.1	R. A. Lopez-Perez. 2008. Fossil corals from the Gulf of California, Mexico: still a depauperate fauna but it bears more species than previously thought. Proceedings of the California Academy of Sciences, 4 59(12):503-519
Pavona minuta	35.4667	27.6833	W-C. Dullo. 1990. Facies, Fossil Record, and Age of Pleistocene Reefs from the Red Sea (Saudi Arabia). Facies 22:1-46
Pavona varians	43.15	11.6	E. Montanaro Gallitelli. 1973. Ricerche eseguite negli anni 1941-1942 sopra i Coralli delle scogliere emerse di Massaua e Gibuti [Research done between 1941 and 1942 on emersed coral reefs of Massawa and Djibouti]. Missione Geologica dell'Azienda Generale Italiana Petroli (AGIP) nella Dancalia Meridionale e sugli Altipiani Hararini (1936-1938) 4(2):446-519
Platygyra crosslandi	34.2253	27.7886	H. Mewis. 2011. Field work Sinai.
Platygyra daedalea	147.783	-6.31667	J. M. Pandolfi. 1996. Limited membership in Pleistocene reef coral assemblages from the Huon Peninsula, Papua New Guinea: constancy during global change. Paleobiology 22(2):152-176
Platygyra daedalea	147.683	-6.25	W. Kiessling, C. Simpson, and B. Beck, J. Pandolfi. 2011. Taxonomic vetting of Pleistocene coral occurrence data.
Platygyra daedalea	147.667	-6.21667	J. M. Pandolfi. 1996. Limited membership in Pleistocene reef coral assemblages from the Huon Peninsula, Papua New Guinea: constancy during global change. Paleobiology 22(2):152-176
Platygyra daedalea	147.6	-6.08333	J. M. Pandolfi. 1996. Limited membership in Pleistocene reef coral assemblages from the Huon Peninsula, Papua New Guinea: constancy during global change. Paleobiology 22(2):152-176
Platygyra daedalea	43.15	11.6	E. Montanaro Gallitelli. 1973. Ricerche eseguite negli anni 1941-1942 sopra i Coralli delle scogliere emerse di Massaua e Gibuti [Research done between 1941 and 1942 on emersed coral reefs of Massawa and Djibouti]. Missione Geologica dell'Azienda Generale Italiana Petroli (AGIP) nella Dancalia Meridionale e sugli Altipiani Hararini (1936-1938) 4(2):446-519
Platygyra daedalea	38.9333	22.8	A. El-Sorogy, M. Youssef, and M. Al-Sabrouty, N. Al-Otaiby. 2013. Facies pattern and molluscan fauna of the Late Pleistocene raised coral reef of Rabigh area, Red Sea coast, Saudi Arabia.
Platygyra daedalea	34.25	26.15	A. S. El-Sorogy. 2008. Contributions to the Pleistocene coral reefs of the Red Sea coast, Egypt. Arab Gulf Journal of Scientific Research 26:63-85
Platygyra daedalea	34.035	26.555	L. R. Casazza. 2012. Symbiosis in the Fossil Record: Eocene Nummulites and Pleistocene Reefs of Egypt.
Platygyra daedalea	33.9111	26.9661	L. R. Casazza. 2012. Symbiosis in the Fossil Record: Eocene Nummulites and Pleistocene Reefs of Egypt.
Platygyra daedalea	33.5833	27.65	A. S. El-Sorogy. 2002. Paleontology and depositional environments of the Pleistocene coral reefs of the Gulf of Suez, Egypt. Neues Jahrbuch fÃ¼r Geologie und PalÃ¤ontologie, Abhandlungen 225(3):337-371
Platygyra daedalea	35.4667	27.6833	W. Kiessling, C. Simpson, and B. Beck, J. Pandolfi. 2011. Taxonomic vetting of Pleistocene coral occurrence data.
Platygyra daedalea	34.5208	28.5553	H. Mewis. 2011. Field work Sinai.
Platygyra daedalea	34.5339	28.5681	H. Mewis. 2011. Field work Sinai.
Platygyra lamellina	153.367	-29.1	J. Pickett. 1981. A Late Pleistocene coral fauna from Evans Head, N.S.W. Alcheringa 5:71-83
Platygyra lamellina	147.583	-6.11667	M. Stein, G. J. Wasserburg, and P. Aharon, J. H. Chen, Z. R. Chu, A. Bloom, J. Chappell. 1993. TIMS U-series dating and stable isotopes of the last interglacial event in Papua New Guinea. Geochimica et Cosmochimica Acta 57:2541-2554
Platygyra lamellina	39.4833	-4.45	J. A. Crame. 1981. Ecological stratification in the Pleistocene coral reefs of the Kenya coast. Palaeontology 24(3):609-646
Platygyra lamellina	39.5833	-4.28333	J. A. Crame. 1981. Ecological stratification in the Pleistocene coral reefs of the Kenya coast. Palaeontology 24(3):609-646
Platygyra lamellina	39.6667	-4.03333	J. A. Crame. 1981. Ecological stratification in the Pleistocene coral reefs of the Kenya coast. Palaeontology 24(3):609-646
Platygyra lamellina	39.7	-4	J. A. Crame. 1980. Succession and diversity in the Pleistocene coral reefs of the Kenya Coast. Palaeontology 23(1):1-37
Platygyra lamellina	40.1333	-3.25	J. A. Crame. 1980. Succession and diversity in the Pleistocene coral reefs of the Kenya Coast. Palaeontology 23(1):1-37
Platygyra lamellina	43.15	11.6	E. Montanaro Gallitelli. 1973. Ricerche eseguite negli anni 1941-1942 sopra i Coralli delle scogliere emerse di Massaua e Gibuti [Research done between 1941 and 1942 on emersed coral reefs of Massawa and Djibouti]. Missione Geologica dell'Azienda Generale Italiana Petroli (AGIP) nella Dancalia Meridionale e sugli Altipiani Hararini (1936-1938) 4(2):446-519
Platygyra lamellina	40	15.15	J. H. Bruggemann, R. T. Buffler, and M. M. M. Guillaume, R. C. Walter, R. v. Cosel, B. N. Ghebretensae, S. M. Berhe. 2004. Stratigraphy, palaeoenvironments and model for the deposition of the Abdur Reef Limestone: context for an important archaeological site from the last interglacial on the Red Sea coast of Eritrea. Palaeogeography, Palaeoclimatology, Palaeoecology 203(3):179-206
Platygyra lamellina	39.4667	15.6167	E. Montanaro Gallitelli. 1973. Ricerche eseguite negli anni 1941-1942 sopra i Coralli delle scogliere emerse di Massaua e Gibuti [Research done between 1941 and 1942 on emersed coral reefs of Massawa and Djibouti]. Missione Geologica dell'Azienda Generale Italiana Petroli (AGIP) nella Dancalia Meridionale e sugli Altipiani Hararini (1936-1938) 4(2):446-519
Platygyra lamellina	34.2386	27.7869	H. Mewis. 2011. Field work Sinai.
Platygyra lamellina	34.2253	27.7889	H. Mewis. 2011. Field work Sinai.
Platygyra lamellina	34.5208	28.5553	H. Mewis. 2011. Field work Sinai.
Platygyra lamellina	34.5211	28.5556	H. Mewis. 2011. Field work Sinai.
Platygyra lamellina	34.5303	28.5664	H. Mewis. 2011. Field work Sinai.
Platygyra lamellina	34.5339	28.5681	H. Mewis. 2011. Field work Sinai.
Platygyra lamellina	34.5356	28.57	H. Mewis. 2011. Field work Sinai.
Platygyra pini	168.254	-17.5817	H. Mewis. 2011. Field work Vanuatu.
Platygyra pini	168.255	-17.5772	H. Mewis. 2011. Field work Vanuatu.
Platygyra pini	147.783	-6.31667	J. M. Pandolfi. 1996. Limited membership in Pleistocene reef coral assemblages from the Huon Peninsula, Papua New Guinea: constancy during global change. Paleobiology 22(2):152-176
Platygyra pini	147.683	-6.25	J. M. Pandolfi. 1996. Limited membership in Pleistocene reef coral assemblages from the Huon Peninsula, Papua New Guinea: constancy during global change. Paleobiology 22(2):152-176
Platygyra pini	147.667	-6.21667	J. M. Pandolfi. 1996. Limited membership in Pleistocene reef coral assemblages from the Huon Peninsula, Papua New Guinea: constancy during global change. Paleobiology 22(2):152-176
Platygyra pini	147.6	-6.08333	J. M. Pandolfi. 1996. Limited membership in Pleistocene reef coral assemblages from the Huon Peninsula, Papua New Guinea: constancy during global change. Paleobiology 22(2):152-176
Platygyra ryukyuensis	147.783	-6.31667	J. M. Pandolfi. 1996. Limited membership in Pleistocene reef coral assemblages from the Huon Peninsula, Papua New Guinea: constancy during global change. Paleobiology 22(2):152-176
Platygyra ryukyuensis	147.6	-6.08333	J. M. Pandolfi. 1996. Limited membership in Pleistocene reef coral assemblages from the Huon Peninsula, Papua New Guinea: constancy during global change. Paleobiology 22(2):152-176
Platygyra sinensis	167.417	-22.55	J. Launay. 1985. Paleoniveaux marins et neotectonique a l'Ile des Pins (Nouvelle-Caledonie) [Marine paleolevels and neotectonics at Ile des Pins (New Caledonia)]. Geologie de la France 1:77-81
Platygyra sinensis	166.55	-13.1333	F. W. Taylor, C. Jouannic, and A. L. Bloom. 1985. Quaternary uplift of the Torres Islands, northern New Hebrides frontal arc: comparison with Santo and Malekula Islands, central New Hebrides frontal arc. Journal of Geology 93:419-438
Platygyra sinensis	147.783	-6.31667	J. M. Pandolfi. 1996. Limited membership in Pleistocene reef coral assemblages from the Huon Peninsula, Papua New Guinea: constancy during global change. Paleobiology 22(2):152-176
Platygyra sinensis	147.683	-6.25	J. M. Pandolfi. 1996. Limited membership in Pleistocene reef coral assemblages from the Huon Peninsula, Papua New Guinea: constancy during global change. Paleobiology 22(2):152-176
Platygyra sinensis	147.667	-6.21667	J. M. Pandolfi. 1996. Limited membership in Pleistocene reef coral assemblages from the Huon Peninsula, Papua New Guinea: constancy during global change. Paleobiology 22(2):152-176
Platygyra sinensis	147.6	-6.08333	J. M. Pandolfi. 1996. Limited membership in Pleistocene reef coral assemblages from the Huon Peninsula, Papua New Guinea: constancy during global change. Paleobiology 22(2):152-176
Platygyra sinensis	147.567	-6.06667	M. Stein, G. J. Wasserburg, and P. Aharon, J. H. Chen, Z. R. Chu, A. Bloom, J. Chappell. 1993. TIMS U-series dating and stable isotopes of the last interglacial event in Papua New Guinea. Geochimica et Cosmochimica Acta 57:2541-2554
Platygyra sinensis	69	22.4167	D. K. Pandey and R. Singh. 2010. Early Pliocene - Holocene Favia from the northern and northwestern coastal areas of Saurashtra Peninsula, western India. Journal of the Palaeontological Society of India 55(2):107-120
Plerogyra sinuosa	35.4667	27.6833	W-C. Dullo. 1990. Facies, Fossil Record, and Age of Pleistocene Reefs from the Red Sea (Saudi Arabia). Facies 22:1-46
Plesiastrea versipora	147.783	-6.31667	J. M. Pandolfi. 1996. Limited membership in Pleistocene reef coral assemblages from the Huon Peninsula, Papua New Guinea: constancy during global change. Paleobiology 22(2):152-176
Plesiastrea versipora	147.667	-6.21667	J. M. Pandolfi. 1996. Limited membership in Pleistocene reef coral assemblages from the Huon Peninsula, Papua New Guinea: constancy during global change. Paleobiology 22(2):152-176
Plesiastrea versipora	147.6	-6.08333	J. M. Pandolfi. 1996. Limited membership in Pleistocene reef coral assemblages from the Huon Peninsula, Papua New Guinea: constancy during global change. Paleobiology 22(2):152-176
Plesiastrea versipora	39.5833	-4.28333	J. A. Crame. 1981. Ecological stratification in the Pleistocene coral reefs of the Kenya coast. Palaeontology 24(3):609-646
Pleuractis granulosa	40	15.15	J. H. Bruggemann, R. T. Buffler, and M. M. M. Guillaume, R. C. Walter, R. v. Cosel, B. N. Ghebretensae, S. M. Berhe. 2004. Stratigraphy, palaeoenvironments and model for the deposition of the Abdur Reef Limestone: context for an important archaeological site from the last interglacial on the Red Sea coast of Eritrea. Palaeogeography, Palaeoclimatology, Palaeoecology 203(3):179-206
Pleuractis granulosa	35.4667	27.6833	W-C. Dullo. 1990. Facies, Fossil Record, and Age of Pleistocene Reefs from the Red Sea (Saudi Arabia). Facies 22:1-46
Pleuractis paumotensis	39.4667	15.6167	E. Montanaro Gallitelli. 1973. Ricerche eseguite negli anni 1941-1942 sopra i Coralli delle scogliere emerse di Massaua e Gibuti [Research done between 1941 and 1942 on emersed coral reefs of Massawa and Djibouti]. Missione Geologica dell'Azienda Generale Italiana Petroli (AGIP) nella Dancalia Meridionale e sugli Altipiani Hararini (1936-1938) 4(2):446-519
Pocillopora capitata	-109.417	23.4333	R. A. Lopez-Perez. 2008. Fossil corals from the Gulf of California, Mexico: still a depauperate fauna but it bears more species than previously thought. Proceedings of the California Academy of Sciences, 4 59(12):503-519
Pocillopora capitata	-109.817	24.0333	R. A. Lopez-Perez. 2008. Fossil corals from the Gulf of California, Mexico: still a depauperate fauna but it bears more species than previously thought. Proceedings of the California Academy of Sciences, 4 59(12):503-519
Pocillopora capitata	-110.733	24.5333	R. A. Lopez-Perez. 2008. Fossil corals from the Gulf of California, Mexico: still a depauperate fauna but it bears more species than previously thought. Proceedings of the California Academy of Sciences, 4 59(12):503-519
Pocillopora capitata	-110.933	25.2667	R. A. Lopez-Perez. 2008. Fossil corals from the Gulf of California, Mexico: still a depauperate fauna but it bears more species than previously thought. Proceedings of the California Academy of Sciences, 4 59(12):503-519
Pocillopora capitata	-111.2	25.8167	R. A. Lopez-Perez. 2008. Fossil corals from the Gulf of California, Mexico: still a depauperate fauna but it bears more species than previously thought. Proceedings of the California Academy of Sciences, 4 59(12):503-519
Pocillopora capitata	-111.267	26.1	R. A. Lopez-Perez. 2008. Fossil corals from the Gulf of California, Mexico: still a depauperate fauna but it bears more species than previously thought. Proceedings of the California Academy of Sciences, 4 59(12):503-519
Pocillopora damicornis	153.367	-29.1	J. Pickett. 1981. A Late Pleistocene coral fauna from Evans Head, N.S.W. Alcheringa 5:71-83
Pocillopora damicornis	113.733	-28.4167	B. J. Greenstein and J. M. Pandolfi. 2008. Escaping the heat: range shifts of reef coral taxa in coastal Western Australia. Global Change Biology 14:513-528
Pocillopora damicornis	43.6333	-23.4	G. F. Camoin, L. F. Montaggioni, and C. J. R. Braithwaite. 2004. Late glacial to post glacial sea levels in the western Indian Ocean. Marine Geology 206:119-146
Pocillopora damicornis	57.5	-20.3333	L. F. Montaggioni. 1982. Pleistocene marine depositional environments from Mauritius island, Indian Ocean. Geobios 15(2):161-179
Pocillopora damicornis	43.15	11.6	E. Montanaro Gallitelli. 1973. Ricerche eseguite negli anni 1941-1942 sopra i Coralli delle scogliere emerse di Massaua e Gibuti [Research done between 1941 and 1942 on emersed coral reefs of Massawa and Djibouti]. Missione Geologica dell'Azienda Generale Italiana Petroli (AGIP) nella Dancalia Meridionale e sugli Altipiani Hararini (1936-1938) 4(2):446-519
Pocillopora damicornis	38.9333	22.8	A. El-Sorogy, M. Youssef, and M. Al-Sabrouty, N. Al-Otaiby. 2013. Facies pattern and molluscan fauna of the Late Pleistocene raised coral reef of Rabigh area, Red Sea coast, Saudi Arabia.
Pocillopora damicornis	-109.417	23.4333	R. A. Lopez-Perez. 2008. Fossil corals from the Gulf of California, Mexico: still a depauperate fauna but it bears more species than previously thought. Proceedings of the California Academy of Sciences, 4 59(12):503-519
Pocillopora damicornis	-109.817	24.0333	R. A. Lopez-Perez. 2008. Fossil corals from the Gulf of California, Mexico: still a depauperate fauna but it bears more species than previously thought. Proceedings of the California Academy of Sciences, 4 59(12):503-519
Pocillopora damicornis	-110.733	24.5333	R. A. Lopez-Perez. 2008. Fossil corals from the Gulf of California, Mexico: still a depauperate fauna but it bears more species than previously thought. Proceedings of the California Academy of Sciences, 4 59(12):503-519
Pocillopora damicornis	-110.933	25.2667	R. A. Lopez-Perez. 2008. Fossil corals from the Gulf of California, Mexico: still a depauperate fauna but it bears more species than previously thought. Proceedings of the California Academy of Sciences, 4 59(12):503-519
Pocillopora damicornis	34.4847	25.7856	L. R. Casazza. 2012. Symbiosis in the Fossil Record: Eocene Nummulites and Pleistocene Reefs of Egypt.
Pocillopora damicornis	34.25	26.15	A. S. El-Sorogy. 1997. Progressive diagenetic sequence from Pleistocene coral reefs in the area between Quseir and Mersa Alam, Red Sea coast, Egypt. Egyptian journal of geology 41(1):519-540
Pocillopora damicornis	34.035	26.555	L. R. Casazza. 2012. Symbiosis in the Fossil Record: Eocene Nummulites and Pleistocene Reefs of Egypt.
Pocillopora damicornis	33.9111	26.9661	L. R. Casazza. 2012. Symbiosis in the Fossil Record: Eocene Nummulites and Pleistocene Reefs of Egypt.
Pocillopora damicornis	35.4667	27.6833	W-C. Dullo. 1990. Facies, Fossil Record, and Age of Pleistocene Reefs from the Red Sea (Saudi Arabia). Facies 22:1-46
Pocillopora elegans	-109.417	23.4333	D. F. Squires. 1959. Results of the Puritan-American Museum of Natural History expedition to western Mexico. Part 7: Corals and coral reefs in the Gulf of California. Bulletin of the American Museum of Natural History 118:367-432
Pocillopora elegans	-110.933	25.2667	R. A. Lopez-Perez. 2008. Fossil corals from the Gulf of California, Mexico: still a depauperate fauna but it bears more species than previously thought. Proceedings of the California Academy of Sciences, 4 59(12):503-519
Pocillopora eydouxi	113.733	-28.4167	B. J. Greenstein and J. M. Pandolfi. 2008. Escaping the heat: range shifts of reef coral taxa in coastal Western Australia. Global Change Biology 14:513-528
Pocillopora eydouxi	46.4467	-9.42194	J. D. Taylor. 1978. Faunal response to the instability of reef habitats: Pleistocene molluscan assemblages of Aldabra Atoll. Palaeontology 21(1):1-30
Pocillopora verrucosa	114.9	-29.2667	B. J. Greenstein and J. M. Pandolfi. 2008. Escaping the heat: range shifts of reef coral taxa in coastal Western Australia. Global Change Biology 14:513-528
Pocillopora verrucosa	113.733	-28.4167	B. J. Greenstein and J. M. Pandolfi. 2008. Escaping the heat: range shifts of reef coral taxa in coastal Western Australia. Global Change Biology 14:513-528
Pocillopora verrucosa	-149.4	-17.4833	P. Blanchon, M. Granados-Corea, and E. Abbey, J. C. Braga, C. Braithwaite. 2014. Postglacial Fringing-Reef to Barrier-Reef\r\nconversion on Tahiti links Darwin's reef types. Scientific Reports 4(4997):1-9
Pocillopora verrucosa	145.333	-15.4167	J. M. Webster and P. J. Davies. 2003. Coral variation in two deep drill cores: significance for the Pleistocene development of the Great Barrier Reef. Sedimentary Geology 159(1-2):61-80
Pocillopora verrucosa	38.9333	22.8	A. El-Sorogy, M. Youssef, and M. Al-Sabrouty, N. Al-Otaiby. 2013. Facies pattern and molluscan fauna of the Late Pleistocene raised coral reef of Rabigh area, Red Sea coast, Saudi Arabia.
Pocillopora verrucosa	-109.417	23.4333	R. A. Lopez-Perez. 2008. Fossil corals from the Gulf of California, Mexico: still a depauperate fauna but it bears more species than previously thought. Proceedings of the California Academy of Sciences, 4 59(12):503-519
Pocillopora verrucosa	-110.933	25.2667	R. A. Lopez-Perez. 2008. Fossil corals from the Gulf of California, Mexico: still a depauperate fauna but it bears more species than previously thought. Proceedings of the California Academy of Sciences, 4 59(12):503-519
Pocillopora verrucosa	34.25	26.15	A. S. El-Sorogy. 2008. Contributions to the Pleistocene coral reefs of the Red Sea coast, Egypt. Arab Gulf Journal of Scientific Research 26:63-85
Pocillopora verrucosa	35.4667	27.6833	W-C. Dullo. 1990. Facies, Fossil Record, and Age of Pleistocene Reefs from the Red Sea (Saudi Arabia). Facies 22:1-46
Pocillopora verrucosa	34.5303	28.5664	H. Mewis. 2011. Field work Sinai.
Porites astreoides	-68.9833	12.1333	W. Kiessling, C. Simpson, and B. Beck, J. Pandolfi. 2011. Taxonomic vetting of Pleistocene coral occurrence data.
Porites astreoides	-68.8833	12.1667	W. Kiessling, C. Simpson, and B. Beck, J. Pandolfi. 2011. Taxonomic vetting of Pleistocene coral occurrence data.
Porites astreoides	-69.0833	12.2	W. Kiessling, C. Simpson, and B. Beck, J. Pandolfi. 2011. Taxonomic vetting of Pleistocene coral occurrence data.
Porites astreoides	-69.0167	12.2333	W. Kiessling, C. Simpson, and B. Beck, J. Pandolfi. 2011. Taxonomic vetting of Pleistocene coral occurrence data.
Porites astreoides	-69.1333	12.3	W. Kiessling, C. Simpson, and B. Beck, J. Pandolfi. 2011. Taxonomic vetting of Pleistocene coral occurrence data.
Porites astreoides	-81.7167	12.5	W. Kiessling, C. Simpson, and B. Beck, J. Pandolfi. 2011. Taxonomic vetting of Pleistocene coral occurrence data.
Porites astreoides	-81.7	12.5	J. M. Pandolfi and J. B. C. Jackson. 2007. Broad-scale patterns in Pleistocene coral reef communities from the Caribbean: implications for ecology and management. In R. B. Aronson (ed.), Geological approaches to coral reef ecology. Ecological Studies 192:201-236
Porites astreoides	-81.7	12.5333	J. M. Pandolfi and J. B. C. Jackson. 2007. Broad-scale patterns in Pleistocene coral reef communities from the Caribbean: implications for ecology and management. In R. B. Aronson (ed.), Geological approaches to coral reef ecology. Ecological Studies 192:201-236
Porites astreoides	-81.7167	12.5667	W. Kiessling, C. Simpson, and B. Beck, J. Pandolfi. 2011. Taxonomic vetting of Pleistocene coral occurrence data.
Porites astreoides	-81.3667	13.35	J. M. Pandolfi and J. B. C. Jackson. 2007. Broad-scale patterns in Pleistocene coral reef communities from the Caribbean: implications for ecology and management. In R. B. Aronson (ed.), Geological approaches to coral reef ecology. Ecological Studies 192:201-236
Porites astreoides	-64.6	17.75	M. A. Toscano, I. G. Macintyre, and J. Lundberg. 2012. Last interglacial reef limestones, northeastern St. Croix, US Virgin Islands â€” evidence of tectonic tilting and subsidence since MIS 5.5. Coral Reefs 31(1):27-38
Porites astreoides	-76.3167	17.8667	S. F. Mitchell, R. K. Pickerill, and T. A. Stemann. 2001. The Port Morant Formation (Upper Pleistocene, Jamaica): high resolution sedimentology and paleoenvironmental analysis of a mixed carbonate clastic lagoonal succession. Sedimentary Geology 144:291-306
Porites astreoides	-76.3167	17.8833	S. A. James. 2006. Coral Biodiversity and Zonation on a Pleistocene Reef, Southeastern Jamaica. Jamaica Clearing House Mechanism
Porites astreoides	-77.3333	18.5	S. K. Boss and W. D. Liddell. 1987. Back-reef and Fore-reef Analogs in the Pleistocene of North Jamaica: Implications for Facies Recognition and Sediment Flux in Fossil reefs. Palaios 2:219-228
Porites astreoides	-81.3833	19.2667	I. G. Hunter and B. Jones. 1996. Coral associations of the Pleistocene Ironshore Formation, Grand Cayman. Coral Reefs 15(4):249-267
Porites astreoides	-81.3333	19.2833	I. G. Hunter and B. Jones. 1996. Coral associations of the Pleistocene Ironshore Formation, Grand Cayman. Coral Reefs 15(4):249-267
Porites astreoides	-81.3833	19.2833	I. G. Hunter and B. Jones. 1996. Coral associations of the Pleistocene Ironshore Formation, Grand Cayman. Coral Reefs 15(4):249-267
Porites astreoides	-81.3667	19.3	I. G. Hunter and B. Jones. 1996. Coral associations of the Pleistocene Ironshore Formation, Grand Cayman. Coral Reefs 15(4):249-267
Porites astreoides	-81.3667	19.3167	I. G. Hunter and B. Jones. 1996. Coral associations of the Pleistocene Ironshore Formation, Grand Cayman. Coral Reefs 15(4):249-267
Porites astreoides	-81.3667	19.35	I. G. Hunter and B. Jones. 1996. Coral associations of the Pleistocene Ironshore Formation, Grand Cayman. Coral Reefs 15(4):249-267
Porites astreoides	-81.3667	19.3667	I. G. Hunter and B. Jones. 1996. Coral associations of the Pleistocene Ironshore Formation, Grand Cayman. Coral Reefs 15(4):249-267
Porites astreoides	-81.3833	19.3667	I. G. Hunter and B. Jones. 1996. Coral associations of the Pleistocene Ironshore Formation, Grand Cayman. Coral Reefs 15(4):249-267
Porites astreoides	-81.4	19.3667	I. G. Hunter and B. Jones. 1996. Coral associations of the Pleistocene Ironshore Formation, Grand Cayman. Coral Reefs 15(4):249-267
Porites astreoides	-81.4167	19.3667	I. G. Hunter and B. Jones. 1996. Coral associations of the Pleistocene Ironshore Formation, Grand Cayman. Coral Reefs 15(4):249-267
Porites astreoides	-81.3667	19.3833	I. G. Hunter and B. Jones. 1996. Coral associations of the Pleistocene Ironshore Formation, Grand Cayman. Coral Reefs 15(4):249-267
Porites astreoides	-81.4	19.3833	I. G. Hunter and B. Jones. 1996. Coral associations of the Pleistocene Ironshore Formation, Grand Cayman. Coral Reefs 15(4):249-267
Porites astreoides	-81.3833	19.3833	I. G. Hunter and B. Jones. 1996. Coral associations of the Pleistocene Ironshore Formation, Grand Cayman. Coral Reefs 15(4):249-267
Porites astreoides	-87.1208	20.5778	E. JordÃ¡n-Dahlgren. 1997. A Caribbean coral reef community of the Pleistocene. Proceedings of the 8th International Coral Reef Symposium 2:1681-1686
Porites astreoides	-73.6833	21.0167	A. F. Budd and J. M. Pandolfi. 2004. Overlapping species boundaries and hybridization within the Montastrea "annularis" reef coral complex in the Pleistocene of the Bahama Islands. Paleobiology 30(3):396-425
Porites astreoides	-74.55	23.95	D. E. Hattin and V. L. Warren. 1989. Stratigraphic analysis of a fossil Neogoniolithon-capped patch reef and associated facies, San Salvador, Bahamas. Coral Reefs (8):19-30
Porites astreoides	-74.5167	24.0333	B. J. Greenstein, L. A. Harris, and H. A. Curran. 1998. Comparison of recent coral life and death assemblages to Pleistocene reef communities: implications for rapid faunal replacement on recent reefs. Carbonates and Evaporites 13(1):23-31
Porites astreoides	-74.5333	24.05	A. F. Budd and J. M. Pandolfi. 2004. Overlapping species boundaries and hybridization within the Montastrea "annularis" reef coral complex in the Pleistocene of the Bahama Islands. Paleobiology 30(3):396-425
Porites astreoides	-74.5167	24.0833	A. F. Budd and J. M. Pandolfi. 2004. Overlapping species boundaries and hybridization within the Montastrea "annularis" reef coral complex in the Pleistocene of the Bahama Islands. Paleobiology 30(3):396-425
Porites astreoides	-81.5667	24.6667	N. E. Weisbord. 1974. Late Cenozoic corals of south Florida. Bulletins of American Paleontology 66(285):259-544
Porites astreoides	-81.5831	24.6672	G. Multer, E. Gischler, and J. Lundberg, K. R. Simmons, E. A. Shinn. 2002. Key Largo Limestone Revisited: Pleistocene Shelf-edge Facies, Florida Keys, USA. Facies 46:229-272
Porites astreoides	-80.5833	24.9333	B. J. Greenstein, H. A. Curran, and J. M. Pandolfi. 1998. Shifting ecological baselines and the demise of Acropora cervicornis in the western North Atlantic and Caribbean Province: a Pleistocene perspective. Coral Reefs 17:249-261
Porites astreoides	-80.3833	25.1333	B. J. Greenstein, H. A. Curran, and J. M. Pandolfi. 1998. Shifting ecological baselines and the demise of Acropora cervicornis in the western North Atlantic and Caribbean Province: a Pleistocene perspective. Coral Reefs 17:249-261
Porites australiensis	145.333	-15.4167	J. M. Webster and P. J. Davies. 2003. Coral variation in two deep drill cores: significance for the Pleistocene development of the Great Barrier Reef. Sedimentary Geology 159(1-2):61-80
Porites columnaris	35.4667	27.6833	W-C. Dullo. 1990. Facies, Fossil Record, and Age of Pleistocene Reefs from the Red Sea (Saudi Arabia). Facies 22:1-46
Porites compressa	40	15.15	J. H. Bruggemann, R. T. Buffler, and M. M. M. Guillaume, R. C. Walter, R. v. Cosel, B. N. Ghebretensae, S. M. Berhe. 2004. Stratigraphy, palaeoenvironments and model for the deposition of the Abdur Reef Limestone: context for an important archaeological site from the last interglacial on the Red Sea coast of Eritrea. Palaeogeography, Palaeoclimatology, Palaeoecology 203(3):179-206
Porites compressa	35.4667	27.6833	W-C. Dullo. 1990. Facies, Fossil Record, and Age of Pleistocene Reefs from the Red Sea (Saudi Arabia). Facies 22:1-46
Porites divaricata	-69.1	12.3667	J. M. Pandolfi. 2001. Community structure of Pleistocene coral reefs of Curacao, Netherlands Antilles. Ecological Monographs 71(1):49-67
Porites divaricata	-76.3167	17.8667	S. F. Mitchell, R. K. Pickerill, and T. A. Stemann. 2001. The Port Morant Formation (Upper Pleistocene, Jamaica): high resolution sedimentology and paleoenvironmental analysis of a mixed carbonate clastic lagoonal succession. Sedimentary Geology 144:291-306
Porites divaricata	-81.35	19.2833	I. G. Hunter and B. Jones. 1996. Coral associations of the Pleistocene Ironshore Formation, Grand Cayman. Coral Reefs 15(4):249-267
Porites divaricata	-81.3333	19.2833	I. G. Hunter and B. Jones. 1996. Coral associations of the Pleistocene Ironshore Formation, Grand Cayman. Coral Reefs 15(4):249-267
Porites divaricata	-81.3	19.3	I. G. Hunter and B. Jones. 1996. Coral associations of the Pleistocene Ironshore Formation, Grand Cayman. Coral Reefs 15(4):249-267
Porites divaricata	-81.3333	19.3	I. G. Hunter and B. Jones. 1996. Coral associations of the Pleistocene Ironshore Formation, Grand Cayman. Coral Reefs 15(4):249-267
Porites divaricata	-81.3667	19.3167	I. G. Hunter and B. Jones. 1996. Coral associations of the Pleistocene Ironshore Formation, Grand Cayman. Coral Reefs 15(4):249-267
Porites divaricata	-81.3667	19.3667	I. G. Hunter and B. Jones. 1996. Coral associations of the Pleistocene Ironshore Formation, Grand Cayman. Coral Reefs 15(4):249-267
Porites divaricata	-81.3833	19.3667	I. G. Hunter and B. Jones. 1996. Coral associations of the Pleistocene Ironshore Formation, Grand Cayman. Coral Reefs 15(4):249-267
Porites divaricata	-81.3667	19.3833	I. G. Hunter and B. Jones. 1996. Coral associations of the Pleistocene Ironshore Formation, Grand Cayman. Coral Reefs 15(4):249-267
Porites divaricata	-81.5667	24.6667	N. E. Weisbord. 1974. Late Cenozoic corals of south Florida. Bulletins of American Paleontology 66(285):259-544
Porites divaricata	-80.5833	24.9333	B. J. Greenstein, H. A. Curran, and J. M. Pandolfi. 1998. Shifting ecological baselines and the demise of Acropora cervicornis in the western North Atlantic and Caribbean Province: a Pleistocene perspective. Coral Reefs 17:249-261
Porites divaricata	-80.3833	25.1333	B. J. Greenstein, H. A. Curran, and J. M. Pandolfi. 1998. Shifting ecological baselines and the demise of Acropora cervicornis in the western North Atlantic and Caribbean Province: a Pleistocene perspective. Coral Reefs 17:249-261
Porites furcata	-68.9833	12.1333	J. M. Pandolfi. 2001. Community structure of Pleistocene coral reefs of Curacao, Netherlands Antilles. Ecological Monographs 71(1):49-67
Porites furcata	-68.8833	12.1667	J. M. Pandolfi. 2001. Community structure of Pleistocene coral reefs of Curacao, Netherlands Antilles. Ecological Monographs 71(1):49-67
Porites furcata	-81.7167	12.5	J. M. Pandolfi and J. B. C. Jackson. 2007. Broad-scale patterns in Pleistocene coral reef communities from the Caribbean: implications for ecology and management. In R. B. Aronson (ed.), Geological approaches to coral reef ecology. Ecological Studies 192:201-236
Porites furcata	-81.7167	12.5667	J. M. Pandolfi and J. B. C. Jackson. 2007. Broad-scale patterns in Pleistocene coral reef communities from the Caribbean: implications for ecology and management. In R. B. Aronson (ed.), Geological approaches to coral reef ecology. Ecological Studies 192:201-236
Porites furcata	-81.3667	13.35	J. M. Pandolfi and J. B. C. Jackson. 2007. Broad-scale patterns in Pleistocene coral reef communities from the Caribbean: implications for ecology and management. In R. B. Aronson (ed.), Geological approaches to coral reef ecology. Ecological Studies 192:201-236
Porites furcata	-76.3167	17.8667	S. F. Mitchell, R. K. Pickerill, and T. A. Stemann. 2001. The Port Morant Formation (Upper Pleistocene, Jamaica): high resolution sedimentology and paleoenvironmental analysis of a mixed carbonate clastic lagoonal succession. Sedimentary Geology 144:291-306
Porites furcata	-76.3167	17.8833	S. A. James. 2006. Coral Biodiversity and Zonation on a Pleistocene Reef, Southeastern Jamaica. Jamaica Clearing House Mechanism
Porites furcata	-77.3333	18.5	S. K. Boss and W. D. Liddell. 1987. Back-reef and Fore-reef Analogs in the Pleistocene of North Jamaica: Implications for Facies Recognition and Sediment Flux in Fossil reefs. Palaios 2:219-228
Porites furcata	-87.1208	20.5778	E. JordÃ¡n-Dahlgren. 1997. A Caribbean coral reef community of the Pleistocene. Proceedings of the 8th International Coral Reef Symposium 2:1681-1686
Porites furcata	-73.6833	21.0167	A. F. Budd and J. M. Pandolfi. 2004. Overlapping species boundaries and hybridization within the Montastrea "annularis" reef coral complex in the Pleistocene of the Bahama Islands. Paleobiology 30(3):396-425
Porites furcata	-74.5333	24.05	A. F. Budd and J. M. Pandolfi. 2004. Overlapping species boundaries and hybridization within the Montastrea "annularis" reef coral complex in the Pleistocene of the Bahama Islands. Paleobiology 30(3):396-425
Porites furcata	-74.5167	24.0833	A. F. Budd and J. M. Pandolfi. 2004. Overlapping species boundaries and hybridization within the Montastrea "annularis" reef coral complex in the Pleistocene of the Bahama Islands. Paleobiology 30(3):396-425
Porites furcata	-81.5667	24.6667	N. E. Weisbord. 1974. Late Cenozoic corals of south Florida. Bulletins of American Paleontology 66(285):259-544
Porites furcata	-80.5833	24.9333	B. J. Greenstein, H. A. Curran, and J. M. Pandolfi. 1998. Shifting ecological baselines and the demise of Acropora cervicornis in the western North Atlantic and Caribbean Province: a Pleistocene perspective. Coral Reefs 17:249-261
Porites furcata	-80.3833	25.1333	B. J. Greenstein, H. A. Curran, and J. M. Pandolfi. 1998. Shifting ecological baselines and the demise of Acropora cervicornis in the western North Atlantic and Caribbean Province: a Pleistocene perspective. Coral Reefs 17:249-261
Porites lobata	153.367	-29.1	J. Pickett. 1981. A Late Pleistocene coral fauna from Evans Head, N.S.W. Alcheringa 5:71-83
Porites lobata	145.333	-15.4167	J. M. Webster and P. J. Davies. 2003. Coral variation in two deep drill cores: significance for the Pleistocene development of the Great Barrier Reef. Sedimentary Geology 159(1-2):61-80
Porites lobata	39.4667	15.6167	E. Montanaro Gallitelli. 1973. Ricerche eseguite negli anni 1941-1942 sopra i Coralli delle scogliere emerse di Massaua e Gibuti [Research done between 1941 and 1942 on emersed coral reefs of Massawa and Djibouti]. Missione Geologica dell'Azienda Generale Italiana Petroli (AGIP) nella Dancalia Meridionale e sugli Altipiani Hararini (1936-1938) 4(2):446-519
Porites lobata	-109.417	23.4333	R. A. Lopez-Perez. 2008. Fossil corals from the Gulf of California, Mexico: still a depauperate fauna but it bears more species than previously thought. Proceedings of the California Academy of Sciences, 4 59(12):503-519
Porites lobata	34.5208	28.5558	H. Mewis. 2011. Field work Sinai.
Porites lutea	145.333	-15.4167	J. M. Webster and P. J. Davies. 2003. Coral variation in two deep drill cores: significance for the Pleistocene development of the Great Barrier Reef. Sedimentary Geology 159(1-2):61-80
Porites lutea	147.6	-6.1	M. Stein, G. J. Wasserburg, and P. Aharon, J. H. Chen, Z. R. Chu, A. Bloom, J. Chappell. 1993. TIMS U-series dating and stable isotopes of the last interglacial event in Papua New Guinea. Geochimica et Cosmochimica Acta 57:2541-2554
Porites lutea	38.9333	22.8	A. El-Sorogy, M. Youssef, and M. Al-Sabrouty, N. Al-Otaiby. 2013. Facies pattern and molluscan fauna of the Late Pleistocene raised coral reef of Rabigh area, Red Sea coast, Saudi Arabia.
Porites lutea	34.25	26.15	A. S. El-Sorogy. 2008. Contributions to the Pleistocene coral reefs of the Red Sea coast, Egypt. Arab Gulf Journal of Scientific Research 26:63-85
Porites lutea	35.4667	27.6833	W-C. Dullo. 1990. Facies, Fossil Record, and Age of Pleistocene Reefs from the Red Sea (Saudi Arabia). Facies 22:1-46
Porites lutea	34.5208	28.5553	H. Mewis. 2011. Field work Sinai.
Porites lutea	34.5303	28.5664	H. Mewis. 2011. Field work Sinai.
Porites nigrescens	46.4467	-9.42194	J. D. Taylor. 1978. Faunal response to the instability of reef habitats: Pleistocene molluscan assemblages of Aldabra Atoll. Palaeontology 21(1):1-30
Porites nodifera	34.2319	27.7956	H. Mewis. 2011. Field work Sinai.
Porites nodifera	34.5208	28.5553	H. Mewis. 2011. Field work Sinai.
Porites nodifera	34.5211	28.5556	H. Mewis. 2011. Field work Sinai.
Porites nodifera	34.5208	28.5558	H. Mewis. 2011. Field work Sinai.
Porites nodifera	34.5211	28.5606	H. Mewis. 2011. Field work Sinai.
Porites nodifera	34.5339	28.5681	H. Mewis. 2011. Field work Sinai.
Porites nodifera	34.5356	28.57	H. Mewis. 2011. Field work Sinai.
Porites panamensis	-109.417	23.4333	R. A. Lopez-Perez. 2008. Fossil corals from the Gulf of California, Mexico: still a depauperate fauna but it bears more species than previously thought. Proceedings of the California Academy of Sciences, 4 59(12):503-519
Porites panamensis	-109.817	24.0333	R. A. Lopez-Perez. 2008. Fossil corals from the Gulf of California, Mexico: still a depauperate fauna but it bears more species than previously thought. Proceedings of the California Academy of Sciences, 4 59(12):503-519
Porites panamensis	-110.233	24.3	L. Sirkin, B. J. Szabo, and G. Padilla-Arredondo, S. Pedrin-Aviles, E. Diaz-Rivera. 1990. Uranium-series ages of marine terraces, La Paz Peninsula, Baja California Sur, Mexico. Coral Reefs 9:25-30
Porites panamensis	-110.733	24.5333	R. A. Lopez-Perez. 2008. Fossil corals from the Gulf of California, Mexico: still a depauperate fauna but it bears more species than previously thought. Proceedings of the California Academy of Sciences, 4 59(12):503-519
Porites panamensis	-110.783	24.6333	T. DeDiego-Forbis, R. Douglas, and D. Gorsline, E. Nava-Sanchez, L. Mack, J. Banner. 2004. Late Pleistocene (Last Interglacial) terrace deposits, Bahia Coyote, Baja California Sur, Mexico. Quaternary International 120:29-40
Porites panamensis	-110.7	25.2	D. F. Squires. 1959. Results of the Puritan-American Museum of Natural History expedition to western Mexico. Part 7: Corals and coral reefs in the Gulf of California. Bulletin of the American Museum of Natural History 118:367-432
Porites panamensis	-110.933	25.2667	R. A. Lopez-Perez. 2008. Fossil corals from the Gulf of California, Mexico: still a depauperate fauna but it bears more species than previously thought. Proceedings of the California Academy of Sciences, 4 59(12):503-519
Porites panamensis	-111.2	25.8167	R. A. Lopez-Perez. 2008. Fossil corals from the Gulf of California, Mexico: still a depauperate fauna but it bears more species than previously thought. Proceedings of the California Academy of Sciences, 4 59(12):503-519
Porites panamensis	-111.133	25.9833	M. E. Johnson, R. A. Lopez-Perez, and C. R. Ransom, J. Ledesma-Vazquez. 2007. Late Pleistocene coral-reef development on Isla Coronados, Gulf of California. Ciencias Marinas 33(2):105-120
Porites panamensis	-111.267	26.1	M. E. Johnson, R. A. Lopez-Perez, and C. R. Ransom, J. Ledesma-Vazquez. 2007. Late Pleistocene coral-reef development on Isla Coronados, Gulf of California. Ciencias Marinas 33(2):105-120
Porites panamensis	-111.467	26.5167	R. A. Lopez-Perez. 2008. Fossil corals from the Gulf of California, Mexico: still a depauperate fauna but it bears more species than previously thought. Proceedings of the California Academy of Sciences, 4 59(12):503-519
Porites panamensis	-111.967	27.05	L. K. Libbey and M. E. Johnson. 1997. Upper Pleistocene Rocky Shores and Intertidal Biotas at Playa La Palmita (Baja California Sur,Mexico). Journal of Coastal Research 13(1):216-225
Porites panamensis	-111.95	27.0667	R. A. Lopez-Perez. 2008. Fossil corals from the Gulf of California, Mexico: still a depauperate fauna but it bears more species than previously thought. Proceedings of the California Academy of Sciences, 4 59(12):503-519
Porites panamensis	-111.975	27.0689	B. G. Baarli, A. Santos, and C. M. da Silva, J. Ledesma-Vazquez, E. Mayoral, M. Cachao, M. E. Johnson. 2012. Diverse Macroids and Rhodoliths from the Upper Pleistocene of Baja California Sur, Mexico. Journal of Coastal Research 28(1):296-305
Porites porites	-68.9833	12.1333	J. M. Pandolfi. 2001. Community structure of Pleistocene coral reefs of Curacao, Netherlands Antilles. Ecological Monographs 71(1):49-67
Porites porites	-81.7167	12.5	J. M. Pandolfi and J. B. C. Jackson. 2007. Broad-scale patterns in Pleistocene coral reef communities from the Caribbean: implications for ecology and management. In R. B. Aronson (ed.), Geological approaches to coral reef ecology. Ecological Studies 192:201-236
Porites porites	-81.7	12.5333	J. M. Pandolfi and J. B. C. Jackson. 2007. Broad-scale patterns in Pleistocene coral reef communities from the Caribbean: implications for ecology and management. In R. B. Aronson (ed.), Geological approaches to coral reef ecology. Ecological Studies 192:201-236
Porites porites	-81.7167	12.5667	J. M. Pandolfi and J. B. C. Jackson. 2007. Broad-scale patterns in Pleistocene coral reef communities from the Caribbean: implications for ecology and management. In R. B. Aronson (ed.), Geological approaches to coral reef ecology. Ecological Studies 192:201-236
Porites porites	-64.6	17.75	M. A. Toscano, I. G. Macintyre, and J. Lundberg. 2012. Last interglacial reef limestones, northeastern St. Croix, US Virgin Islands â€” evidence of tectonic tilting and subsidence since MIS 5.5. Coral Reefs 31(1):27-38
Porites porites	-81.3833	19.2667	I. G. Hunter and B. Jones. 1996. Coral associations of the Pleistocene Ironshore Formation, Grand Cayman. Coral Reefs 15(4):249-267
Porites porites	-81.3667	19.2667	I. G. Hunter and B. Jones. 1996. Coral associations of the Pleistocene Ironshore Formation, Grand Cayman. Coral Reefs 15(4):249-267
Porites porites	-81.3333	19.2833	I. G. Hunter and B. Jones. 1996. Coral associations of the Pleistocene Ironshore Formation, Grand Cayman. Coral Reefs 15(4):249-267
Porites porites	-81.3833	19.2833	I. G. Hunter and B. Jones. 1996. Coral associations of the Pleistocene Ironshore Formation, Grand Cayman. Coral Reefs 15(4):249-267
Porites porites	-81.3333	19.3	I. G. Hunter and B. Jones. 1996. Coral associations of the Pleistocene Ironshore Formation, Grand Cayman. Coral Reefs 15(4):249-267
Porites porites	-81.3667	19.3	I. G. Hunter and B. Jones. 1996. Coral associations of the Pleistocene Ironshore Formation, Grand Cayman. Coral Reefs 15(4):249-267
Porites porites	-81.3667	19.3167	I. G. Hunter and B. Jones. 1996. Coral associations of the Pleistocene Ironshore Formation, Grand Cayman. Coral Reefs 15(4):249-267
Porites porites	-81.3667	19.35	I. G. Hunter and B. Jones. 1996. Coral associations of the Pleistocene Ironshore Formation, Grand Cayman. Coral Reefs 15(4):249-267
Porites porites	-81.0833	19.35	I. G. Hunter and B. Jones. 1996. Coral associations of the Pleistocene Ironshore Formation, Grand Cayman. Coral Reefs 15(4):249-267
Porites porites	-81.3833	19.3667	I. G. Hunter and B. Jones. 1996. Coral associations of the Pleistocene Ironshore Formation, Grand Cayman. Coral Reefs 15(4):249-267
Porites porites	-81.3667	19.3667	I. G. Hunter and B. Jones. 1996. Coral associations of the Pleistocene Ironshore Formation, Grand Cayman. Coral Reefs 15(4):249-267
Porites porites	-81.4	19.3667	I. G. Hunter and B. Jones. 1996. Coral associations of the Pleistocene Ironshore Formation, Grand Cayman. Coral Reefs 15(4):249-267
Porites porites	-81.4167	19.3667	I. G. Hunter and B. Jones. 1996. Coral associations of the Pleistocene Ironshore Formation, Grand Cayman. Coral Reefs 15(4):249-267
Porites porites	-81.3667	19.3833	I. G. Hunter and B. Jones. 1996. Coral associations of the Pleistocene Ironshore Formation, Grand Cayman. Coral Reefs 15(4):249-267
Porites porites	-81.4	19.3833	I. G. Hunter and B. Jones. 1996. Coral associations of the Pleistocene Ironshore Formation, Grand Cayman. Coral Reefs 15(4):249-267
Porites porites	-81.3833	19.3833	I. G. Hunter and B. Jones. 1996. Coral associations of the Pleistocene Ironshore Formation, Grand Cayman. Coral Reefs 15(4):249-267
Porites porites	-80.1	19.65	D. R. Stoddart. 1980. Geology and geomorphology of Little Cayman. Atoll Research Bulletin 241:11-16
Porites porites	-87.1208	20.5778	E. JordÃ¡n-Dahlgren. 1997. A Caribbean coral reef community of the Pleistocene. Proceedings of the 8th International Coral Reef Symposium 2:1681-1686
Porites porites	-81.5667	24.6667	N. E. Weisbord. 1974. Late Cenozoic corals of south Florida. Bulletins of American Paleontology 66(285):259-544
Porites porites	-81.5831	24.6672	G. Multer, E. Gischler, and J. Lundberg, K. R. Simmons, E. A. Shinn. 2002. Key Largo Limestone Revisited: Pleistocene Shelf-edge Facies, Florida Keys, USA. Facies 46:229-272
Porites porites	-80.3833	25.1333	B. J. Greenstein, H. A. Curran, and J. M. Pandolfi. 1998. Shifting ecological baselines and the demise of Acropora cervicornis in the western North Atlantic and Caribbean Province: a Pleistocene perspective. Coral Reefs 17:249-261
Porites solida	39.4667	15.6167	E. Montanaro Gallitelli. 1973. Ricerche eseguite negli anni 1941-1942 sopra i Coralli delle scogliere emerse di Massaua e Gibuti [Research done between 1941 and 1942 on emersed coral reefs of Massawa and Djibouti]. Missione Geologica dell'Azienda Generale Italiana Petroli (AGIP) nella Dancalia Meridionale e sugli Altipiani Hararini (1936-1938) 4(2):446-519
Porites solida	38.9333	22.8	A. El-Sorogy, M. Youssef, and M. Al-Sabrouty, N. Al-Otaiby. 2013. Facies pattern and molluscan fauna of the Late Pleistocene raised coral reef of Rabigh area, Red Sea coast, Saudi Arabia.
Porites solida	34.25	26.15	A. S. El-Sorogy. 1997. Progressive diagenetic sequence from Pleistocene coral reefs in the area between Quseir and Mersa Alam, Red Sea coast, Egypt. Egyptian journal of geology 41(1):519-540
Porites solida	35.4667	27.6833	W-C. Dullo. 1990. Facies, Fossil Record, and Age of Pleistocene Reefs from the Red Sea (Saudi Arabia). Facies 22:1-46
Porites sverdrupi	-111.2	25.8167	R. A. Lopez-Perez. 2008. Fossil corals from the Gulf of California, Mexico: still a depauperate fauna but it bears more species than previously thought. Proceedings of the California Academy of Sciences, 4 59(12):503-519
Psammocora stellata	-110.733	24.5333	R. A. Lopez-Perez. 2008. Fossil corals from the Gulf of California, Mexico: still a depauperate fauna but it bears more species than previously thought. Proceedings of the California Academy of Sciences, 4 59(12):503-519
Psammocora stellata	-111.2	25.8167	R. A. Lopez-Perez. 2008. Fossil corals from the Gulf of California, Mexico: still a depauperate fauna but it bears more species than previously thought. Proceedings of the California Academy of Sciences, 4 59(12):503-519
Psammocora stellata	-111.267	26.1	R. A. Lopez-Perez. 2008. Fossil corals from the Gulf of California, Mexico: still a depauperate fauna but it bears more species than previously thought. Proceedings of the California Academy of Sciences, 4 59(12):503-519
Pseudodiploria clivosa	-68.9833	12.1333	J. M. Pandolfi. 2001. Community structure of Pleistocene coral reefs of Curacao, Netherlands Antilles. Ecological Monographs 71(1):49-67
Pseudodiploria clivosa	-68.8833	12.1667	J. M. Pandolfi. 2001. Community structure of Pleistocene coral reefs of Curacao, Netherlands Antilles. Ecological Monographs 71(1):49-67
Pseudodiploria clivosa	-69.0833	12.2	J. M. Pandolfi. 2001. Community structure of Pleistocene coral reefs of Curacao, Netherlands Antilles. Ecological Monographs 71(1):49-67
Pseudodiploria clivosa	-69.0167	12.2333	J. M. Pandolfi. 2001. Community structure of Pleistocene coral reefs of Curacao, Netherlands Antilles. Ecological Monographs 71(1):49-67
Pseudodiploria clivosa	-69.0667	12.2833	J. M. Pandolfi, G. Llewellyn, and J. B. C. Jackson. 1999. Pleistocene reef environments, constituent grains, and coral community structure: Curacao, Netherlands Antilles. Coral Reefs 18:107-122
Pseudodiploria clivosa	-69.1333	12.3	J. M. Pandolfi. 2001. Community structure of Pleistocene coral reefs of Curacao, Netherlands Antilles. Ecological Monographs 71(1):49-67
Pseudodiploria clivosa	-69.1	12.3667	J. M. Pandolfi. 2001. Community structure of Pleistocene coral reefs of Curacao, Netherlands Antilles. Ecological Monographs 71(1):49-67
Pseudodiploria clivosa	-81.7	12.5333	J. M. Pandolfi and J. B. C. Jackson. 2007. Broad-scale patterns in Pleistocene coral reef communities from the Caribbean: implications for ecology and management. In R. B. Aronson (ed.), Geological approaches to coral reef ecology. Ecological Studies 192:201-236
Pseudodiploria clivosa	-69.5167	18.4167	J. S. Klaus and A. F. Budd. 2003. Comparison of Caribbean coral reef communities before and after Plio-Pleistocene faunal turnover: Analyses of two Dominican Republic reef sequences. Palaios 18(1):3-21
Pseudodiploria clivosa	-81.3833	19.2667	I. G. Hunter and B. Jones. 1996. Coral associations of the Pleistocene Ironshore Formation, Grand Cayman. Coral Reefs 15(4):249-267
Pseudodiploria clivosa	-81.3333	19.2667	I. G. Hunter and B. Jones. 1996. Coral associations of the Pleistocene Ironshore Formation, Grand Cayman. Coral Reefs 15(4):249-267
Pseudodiploria clivosa	-81.15	19.2833	I. G. Hunter and B. Jones. 1996. Coral associations of the Pleistocene Ironshore Formation, Grand Cayman. Coral Reefs 15(4):249-267
Pseudodiploria clivosa	-81.3667	19.35	I. G. Hunter and B. Jones. 1996. Coral associations of the Pleistocene Ironshore Formation, Grand Cayman. Coral Reefs 15(4):249-267
Pseudodiploria clivosa	-81.0833	19.35	I. G. Hunter and B. Jones. 1996. Coral associations of the Pleistocene Ironshore Formation, Grand Cayman. Coral Reefs 15(4):249-267
Pseudodiploria clivosa	-81.3667	19.3667	I. G. Hunter and B. Jones. 1996. Coral associations of the Pleistocene Ironshore Formation, Grand Cayman. Coral Reefs 15(4):249-267
Pseudodiploria clivosa	-81.4	19.3667	I. G. Hunter and B. Jones. 1996. Coral associations of the Pleistocene Ironshore Formation, Grand Cayman. Coral Reefs 15(4):249-267
Pseudodiploria clivosa	-73.7167	21.0167	J. H. Chen, H. A. Curren, and B. White, G. J. Wasserburg. 1991. Precise chronology of the last interglacial period: 234U-230Th data from fossil coral reefs in the Bahamas. Geological Society America Bulletin 103:82-97
Pseudodiploria clivosa	-73.6833	21.0167	A. F. Budd and J. M. Pandolfi. 2004. Overlapping species boundaries and hybridization within the Montastrea "annularis" reef coral complex in the Pleistocene of the Bahama Islands. Paleobiology 30(3):396-425
Pseudodiploria clivosa	-74.5167	24.0333	B. J. Greenstein, L. A. Harris, and H. A. Curran. 1998. Comparison of recent coral life and death assemblages to Pleistocene reef communities: implications for rapid faunal replacement on recent reefs. Carbonates and Evaporites 13(1):23-31
Pseudodiploria clivosa	-81.5667	24.6667	N. E. Weisbord. 1974. Late Cenozoic corals of south Florida. Bulletins of American Paleontology 66(285):259-544
Pseudodiploria clivosa	-78	25.1333	A. F. Budd and J. M. Pandolfi. 2004. Overlapping species boundaries and hybridization within the Montastrea "annularis" reef coral complex in the Pleistocene of the Bahama Islands. Paleobiology 30(3):396-425
Pseudodiploria strigosa	-68.9833	12.1333	J. M. Pandolfi. 2001. Community structure of Pleistocene coral reefs of Curacao, Netherlands Antilles. Ecological Monographs 71(1):49-67
Pseudodiploria strigosa	-68.8833	12.1667	J. M. Pandolfi. 2001. Community structure of Pleistocene coral reefs of Curacao, Netherlands Antilles. Ecological Monographs 71(1):49-67
Pseudodiploria strigosa	-69.0833	12.2	J. M. Pandolfi. 2001. Community structure of Pleistocene coral reefs of Curacao, Netherlands Antilles. Ecological Monographs 71(1):49-67
Pseudodiploria strigosa	-69.0167	12.2333	J. M. Pandolfi. 2001. Community structure of Pleistocene coral reefs of Curacao, Netherlands Antilles. Ecological Monographs 71(1):49-67
Pseudodiploria strigosa	-69.0667	12.2833	J. M. Pandolfi, G. Llewellyn, and J. B. C. Jackson. 1999. Pleistocene reef environments, constituent grains, and coral community structure: Curacao, Netherlands Antilles. Coral Reefs 18:107-122
Pseudodiploria strigosa	-69.1333	12.3	J. M. Pandolfi. 2001. Community structure of Pleistocene coral reefs of Curacao, Netherlands Antilles. Ecological Monographs 71(1):49-67
Pseudodiploria strigosa	-69.1	12.3667	J. M. Pandolfi. 2001. Community structure of Pleistocene coral reefs of Curacao, Netherlands Antilles. Ecological Monographs 71(1):49-67
Pseudodiploria strigosa	-81.7167	12.5	J. M. Pandolfi and J. B. C. Jackson. 2007. Broad-scale patterns in Pleistocene coral reef communities from the Caribbean: implications for ecology and management. In R. B. Aronson (ed.), Geological approaches to coral reef ecology. Ecological Studies 192:201-236
Pseudodiploria strigosa	-81.7	12.5	J. M. Pandolfi and J. B. C. Jackson. 2007. Broad-scale patterns in Pleistocene coral reef communities from the Caribbean: implications for ecology and management. In R. B. Aronson (ed.), Geological approaches to coral reef ecology. Ecological Studies 192:201-236
Pseudodiploria strigosa	-81.7	12.5333	J. M. Pandolfi and J. B. C. Jackson. 2007. Broad-scale patterns in Pleistocene coral reef communities from the Caribbean: implications for ecology and management. In R. B. Aronson (ed.), Geological approaches to coral reef ecology. Ecological Studies 192:201-236
Pseudodiploria strigosa	-81.7167	12.5667	J. M. Pandolfi and J. B. C. Jackson. 2007. Broad-scale patterns in Pleistocene coral reef communities from the Caribbean: implications for ecology and management. In R. B. Aronson (ed.), Geological approaches to coral reef ecology. Ecological Studies 192:201-236
Pseudodiploria strigosa	-81.3667	13.35	J. M. Pandolfi and J. B. C. Jackson. 2007. Broad-scale patterns in Pleistocene coral reef communities from the Caribbean: implications for ecology and management. In R. B. Aronson (ed.), Geological approaches to coral reef ecology. Ecological Studies 192:201-236
Pseudodiploria strigosa	-76.3167	17.8667	S. F. Mitchell, R. K. Pickerill, and T. A. Stemann. 2001. The Port Morant Formation (Upper Pleistocene, Jamaica): high resolution sedimentology and paleoenvironmental analysis of a mixed carbonate clastic lagoonal succession. Sedimentary Geology 144:291-306
Pseudodiploria strigosa	-76.333	17.8687	J. S. H. Collins, S. K. Donovan, and T. A. Stemann. 2009. Fossil Crustacea of the Late Pleistocene Port Morant Formation, west Port Morant Harbour, southeastern Jamaica. Scripta Geologica 138:23-53
Pseudodiploria strigosa	-76.3167	17.8833	S. A. James. 2006. Coral Biodiversity and Zonation on a Pleistocene Reef, Southeastern Jamaica. Jamaica Clearing House Mechanism
Pseudodiploria strigosa	-77.3333	18.5	S. K. Boss and W. D. Liddell. 1987. Back-reef and Fore-reef Analogs in the Pleistocene of North Jamaica: Implications for Facies Recognition and Sediment Flux in Fossil reefs. Palaios 2:219-228
Pseudodiploria strigosa	-81.3833	19.2667	I. G. Hunter and B. Jones. 1996. Coral associations of the Pleistocene Ironshore Formation, Grand Cayman. Coral Reefs 15(4):249-267
Pseudodiploria strigosa	-81.3333	19.2667	I. G. Hunter and B. Jones. 1996. Coral associations of the Pleistocene Ironshore Formation, Grand Cayman. Coral Reefs 15(4):249-267
Pseudodiploria strigosa	-81.3833	19.2833	I. G. Hunter and B. Jones. 1996. Coral associations of the Pleistocene Ironshore Formation, Grand Cayman. Coral Reefs 15(4):249-267
Pseudodiploria strigosa	-81.15	19.2833	I. G. Hunter and B. Jones. 1996. Coral associations of the Pleistocene Ironshore Formation, Grand Cayman. Coral Reefs 15(4):249-267
Pseudodiploria strigosa	-81.3333	19.3	I. G. Hunter and B. Jones. 1996. Coral associations of the Pleistocene Ironshore Formation, Grand Cayman. Coral Reefs 15(4):249-267
Pseudodiploria strigosa	-81.3667	19.35	I. G. Hunter and B. Jones. 1996. Coral associations of the Pleistocene Ironshore Formation, Grand Cayman. Coral Reefs 15(4):249-267
Pseudodiploria strigosa	-81.0833	19.35	I. G. Hunter and B. Jones. 1996. Coral associations of the Pleistocene Ironshore Formation, Grand Cayman. Coral Reefs 15(4):249-267
Pseudodiploria strigosa	-81.3667	19.3667	I. G. Hunter and B. Jones. 1996. Coral associations of the Pleistocene Ironshore Formation, Grand Cayman. Coral Reefs 15(4):249-267
Pseudodiploria strigosa	-81.3833	19.3667	I. G. Hunter and B. Jones. 1996. Coral associations of the Pleistocene Ironshore Formation, Grand Cayman. Coral Reefs 15(4):249-267
Pseudodiploria strigosa	-81.4	19.3667	I. G. Hunter and B. Jones. 1996. Coral associations of the Pleistocene Ironshore Formation, Grand Cayman. Coral Reefs 15(4):249-267
Pseudodiploria strigosa	-81.4167	19.3667	I. G. Hunter and B. Jones. 1996. Coral associations of the Pleistocene Ironshore Formation, Grand Cayman. Coral Reefs 15(4):249-267
Pseudodiploria strigosa	-81.4	19.3833	I. G. Hunter and B. Jones. 1996. Coral associations of the Pleistocene Ironshore Formation, Grand Cayman. Coral Reefs 15(4):249-267
Pseudodiploria strigosa	-81.3833	19.3833	I. G. Hunter and B. Jones. 1996. Coral associations of the Pleistocene Ironshore Formation, Grand Cayman. Coral Reefs 15(4):249-267
Pseudodiploria strigosa	-80.1	19.65	D. R. Stoddart. 1980. Geology and geomorphology of Little Cayman. Atoll Research Bulletin 241:11-16
Pseudodiploria strigosa	-87.1208	20.5778	E. JordÃ¡n-Dahlgren. 1997. A Caribbean coral reef community of the Pleistocene. Proceedings of the 8th International Coral Reef Symposium 2:1681-1686
Pseudodiploria strigosa	-73.7167	21.0167	J. H. Chen, H. A. Curren, and B. White, G. J. Wasserburg. 1991. Precise chronology of the last interglacial period: 234U-230Th data from fossil coral reefs in the Bahamas. Geological Society America Bulletin 103:82-97
Pseudodiploria strigosa	-73.6833	21.0167	A. F. Budd and J. M. Pandolfi. 2004. Overlapping species boundaries and hybridization within the Montastrea "annularis" reef coral complex in the Pleistocene of the Bahama Islands. Paleobiology 30(3):396-425
Pseudodiploria strigosa	-74.55	23.95	D. E. Hattin and V. L. Warren. 1989. Stratigraphic analysis of a fossil Neogoniolithon-capped patch reef and associated facies, San Salvador, Bahamas. Coral Reefs (8):19-30
Pseudodiploria strigosa	-74.5167	24.0333	B. J. Greenstein, L. A. Harris, and H. A. Curran. 1998. Comparison of recent coral life and death assemblages to Pleistocene reef communities: implications for rapid faunal replacement on recent reefs. Carbonates and Evaporites 13(1):23-31
Pseudodiploria strigosa	-74.5333	24.05	A. F. Budd and J. M. Pandolfi. 2004. Overlapping species boundaries and hybridization within the Montastrea "annularis" reef coral complex in the Pleistocene of the Bahama Islands. Paleobiology 30(3):396-425
Pseudodiploria strigosa	-74.5167	24.0833	A. F. Budd and J. M. Pandolfi. 2004. Overlapping species boundaries and hybridization within the Montastrea "annularis" reef coral complex in the Pleistocene of the Bahama Islands. Paleobiology 30(3):396-425
Pseudodiploria strigosa	-81.5667	24.6667	N. E. Weisbord. 1974. Late Cenozoic corals of south Florida. Bulletins of American Paleontology 66(285):259-544
Pseudodiploria strigosa	-80.5833	24.9333	B. J. Greenstein, H. A. Curran, and J. M. Pandolfi. 1998. Shifting ecological baselines and the demise of Acropora cervicornis in the western North Atlantic and Caribbean Province: a Pleistocene perspective. Coral Reefs 17:249-261
Pseudodiploria strigosa	-80.6	24.9333	D. R. Muhs, K. R. Simmons, and R. R. Schumann, R. B. Halley. 2011. Sea-level history of the past two interglacial periods: new evidence from U-series dating of reef corals from south Florida. Quaternary Science Reviews 30:570-590
Pseudodiploria strigosa	-77.9333	24.9833	A. F. Budd and J. M. Pandolfi. 2004. Overlapping species boundaries and hybridization within the Montastrea "annularis" reef coral complex in the Pleistocene of the Bahama Islands. Paleobiology 30(3):396-425
Pseudodiploria strigosa	-78	25.1333	A. F. Budd and J. M. Pandolfi. 2004. Overlapping species boundaries and hybridization within the Montastrea "annularis" reef coral complex in the Pleistocene of the Bahama Islands. Paleobiology 30(3):396-425
Pseudodiploria strigosa	-80.3833	25.1333	B. J. Greenstein, H. A. Curran, and J. M. Pandolfi. 1998. Shifting ecological baselines and the demise of Acropora cervicornis in the western North Atlantic and Caribbean Province: a Pleistocene perspective. Coral Reefs 17:249-261
Pseudodiploria strigosa	-80.3667	25.1667	D. R. Muhs, K. R. Simmons, and R. R. Schumann, R. B. Halley. 2011. Sea-level history of the past two interglacial periods: new evidence from U-series dating of reef corals from south Florida. Quaternary Science Reviews 30:570-590
Pseudodiploria strigosa	-80.35	25.1833	D. R. Muhs, K. R. Simmons, and R. R. Schumann, R. B. Halley. 2011. Sea-level history of the past two interglacial periods: new evidence from U-series dating of reef corals from south Florida. Quaternary Science Reviews 30:570-590
Pseudosiderastrea tayamai	120.2	-9.46667	W. Kiessling, C. Simpson, and B. Beck, J. Pandolfi. 2011. Taxonomic vetting of Pleistocene coral occurrence data.
Pseudosiderastrea tayamai	69	22.4167	D. K. Pandey and R. Singh. 2010. Early Pliocene - Holocene Favia from the northern and northwestern coastal areas of Saurashtra Peninsula, western India. Journal of the Palaeontological Society of India 55(2):107-120
Scolymia cubensis	-76.3167	17.8667	S. F. Mitchell, R. K. Pickerill, and T. A. Stemann. 2001. The Port Morant Formation (Upper Pleistocene, Jamaica): high resolution sedimentology and paleoenvironmental analysis of a mixed carbonate clastic lagoonal succession. Sedimentary Geology 144:291-306
Scolymia cubensis	-81.3333	19.2833	I. G. Hunter and B. Jones. 1996. Coral associations of the Pleistocene Ironshore Formation, Grand Cayman. Coral Reefs 15(4):249-267
Scolymia cubensis	-81.3667	19.35	I. G. Hunter and B. Jones. 1996. Coral associations of the Pleistocene Ironshore Formation, Grand Cayman. Coral Reefs 15(4):249-267
Scolymia cubensis	-81.3667	19.3667	I. G. Hunter and B. Jones. 1996. Coral associations of the Pleistocene Ironshore Formation, Grand Cayman. Coral Reefs 15(4):249-267
Scolymia cubensis	-81.3833	19.3667	I. G. Hunter and B. Jones. 1996. Coral associations of the Pleistocene Ironshore Formation, Grand Cayman. Coral Reefs 15(4):249-267
Scolymia cubensis	-81.3667	19.3833	I. G. Hunter and B. Jones. 1996. Coral associations of the Pleistocene Ironshore Formation, Grand Cayman. Coral Reefs 15(4):249-267
Seriatopora caliendrum	35.4667	27.6833	W-C. Dullo. 1990. Facies, Fossil Record, and Age of Pleistocene Reefs from the Red Sea (Saudi Arabia). Facies 22:1-46
Seriatopora hystrix	153.367	-29.1	J. Pickett. 1981. A Late Pleistocene coral fauna from Evans Head, N.S.W. Alcheringa 5:71-83
Seriatopora hystrix	113.733	-28.4167	B. J. Greenstein and J. M. Pandolfi. 2008. Escaping the heat: range shifts of reef coral taxa in coastal Western Australia. Global Change Biology 14:513-528
Seriatopora hystrix	168.255	-17.5758	H. Mewis. 2011. Field work Vanuatu.
Seriatopora hystrix	43.15	11.6	E. Montanaro Gallitelli. 1973. Ricerche eseguite negli anni 1941-1942 sopra i Coralli delle scogliere emerse di Massaua e Gibuti [Research done between 1941 and 1942 on emersed coral reefs of Massawa and Djibouti]. Missione Geologica dell'Azienda Generale Italiana Petroli (AGIP) nella Dancalia Meridionale e sugli Altipiani Hararini (1936-1938) 4(2):446-519
Seriatopora hystrix	124.258	24.5042	H. L. Foster. 1965. Geology of Ishigaki-shima Ryukyu-retto. United States Geological Survey Professional Paper 399(A):1-119
Seriatopora hystrix	35.4667	27.6833	W-C. Dullo. 1990. Facies, Fossil Record, and Age of Pleistocene Reefs from the Red Sea (Saudi Arabia). Facies 22:1-46
Siderastrea radians	-68.9833	12.1333	J. M. Pandolfi. 2001. Community structure of Pleistocene coral reefs of Curacao, Netherlands Antilles. Ecological Monographs 71(1):49-67
Siderastrea radians	-69.1	12.3667	J. M. Pandolfi. 2001. Community structure of Pleistocene coral reefs of Curacao, Netherlands Antilles. Ecological Monographs 71(1):49-67
Siderastrea radians	-81.7167	12.5	J. M. Pandolfi and J. B. C. Jackson. 2007. Broad-scale patterns in Pleistocene coral reef communities from the Caribbean: implications for ecology and management. In R. B. Aronson (ed.), Geological approaches to coral reef ecology. Ecological Studies 192:201-236
Siderastrea radians	-81.7	12.5333	J. M. Pandolfi and J. B. C. Jackson. 2007. Broad-scale patterns in Pleistocene coral reef communities from the Caribbean: implications for ecology and management. In R. B. Aronson (ed.), Geological approaches to coral reef ecology. Ecological Studies 192:201-236
Siderastrea radians	-76.3167	17.8667	S. F. Mitchell, R. K. Pickerill, and T. A. Stemann. 2001. The Port Morant Formation (Upper Pleistocene, Jamaica): high resolution sedimentology and paleoenvironmental analysis of a mixed carbonate clastic lagoonal succession. Sedimentary Geology 144:291-306
Siderastrea radians	-81.3667	19.2667	I. G. Hunter and B. Jones. 1996. Coral associations of the Pleistocene Ironshore Formation, Grand Cayman. Coral Reefs 15(4):249-267
Siderastrea radians	-81.3333	19.2833	I. G. Hunter and B. Jones. 1996. Coral associations of the Pleistocene Ironshore Formation, Grand Cayman. Coral Reefs 15(4):249-267
Siderastrea radians	-81.3833	19.2833	I. G. Hunter and B. Jones. 1996. Coral associations of the Pleistocene Ironshore Formation, Grand Cayman. Coral Reefs 15(4):249-267
Siderastrea radians	-81.2	19.3	I. G. Hunter and B. Jones. 1996. Coral associations of the Pleistocene Ironshore Formation, Grand Cayman. Coral Reefs 15(4):249-267
Siderastrea radians	-81.3333	19.3	I. G. Hunter and B. Jones. 1996. Coral associations of the Pleistocene Ironshore Formation, Grand Cayman. Coral Reefs 15(4):249-267
Siderastrea radians	-81.3667	19.3167	I. G. Hunter and B. Jones. 1996. Coral associations of the Pleistocene Ironshore Formation, Grand Cayman. Coral Reefs 15(4):249-267
Siderastrea radians	-81.3667	19.35	I. G. Hunter and B. Jones. 1996. Coral associations of the Pleistocene Ironshore Formation, Grand Cayman. Coral Reefs 15(4):249-267
Siderastrea radians	-81.4	19.3667	I. G. Hunter and B. Jones. 1996. Coral associations of the Pleistocene Ironshore Formation, Grand Cayman. Coral Reefs 15(4):249-267
Siderastrea radians	-81.3667	19.3833	I. G. Hunter and B. Jones. 1996. Coral associations of the Pleistocene Ironshore Formation, Grand Cayman. Coral Reefs 15(4):249-267
Siderastrea radians	-81.4	19.3833	I. G. Hunter and B. Jones. 1996. Coral associations of the Pleistocene Ironshore Formation, Grand Cayman. Coral Reefs 15(4):249-267
Siderastrea radians	-81.5667	24.6667	N. E. Weisbord. 1974. Late Cenozoic corals of south Florida. Bulletins of American Paleontology 66(285):259-544
Siderastrea radians	-77.9333	24.9833	A. F. Budd and J. M. Pandolfi. 2004. Overlapping species boundaries and hybridization within the Montastrea "annularis" reef coral complex in the Pleistocene of the Bahama Islands. Paleobiology 30(3):396-425
Siderastrea savignyana	35.4667	27.6833	W-C. Dullo. 1990. Facies, Fossil Record, and Age of Pleistocene Reefs from the Red Sea (Saudi Arabia). Facies 22:1-46
Siderastrea savignyana	34.2319	27.7956	H. Mewis. 2011. Field work Sinai.
Siderastrea siderea	-64.6167	11.85	C. Schubert. 1997. Pleistocene marine terraces of la Blanquilla island, Venezuela, and their diagenesis. Proceedings, Third International Coral Reef Symposium 2:149-154
Siderastrea siderea	-68.8833	12.1667	J. M. Pandolfi. 2001. Community structure of Pleistocene coral reefs of Curacao, Netherlands Antilles. Ecological Monographs 71(1):49-67
Siderastrea siderea	-69.0833	12.2	J. M. Pandolfi. 2001. Community structure of Pleistocene coral reefs of Curacao, Netherlands Antilles. Ecological Monographs 71(1):49-67
Siderastrea siderea	-69.0167	12.2333	J. M. Pandolfi. 2001. Community structure of Pleistocene coral reefs of Curacao, Netherlands Antilles. Ecological Monographs 71(1):49-67
Siderastrea siderea	-69.0667	12.2833	J. M. Pandolfi, G. Llewellyn, and J. B. C. Jackson. 1999. Pleistocene reef environments, constituent grains, and coral community structure: Curacao, Netherlands Antilles. Coral Reefs 18:107-122
Siderastrea siderea	-69.1333	12.3	J. M. Pandolfi. 2001. Community structure of Pleistocene coral reefs of Curacao, Netherlands Antilles. Ecological Monographs 71(1):49-67
Siderastrea siderea	-69.1	12.3667	J. M. Pandolfi. 2001. Community structure of Pleistocene coral reefs of Curacao, Netherlands Antilles. Ecological Monographs 71(1):49-67
Siderastrea siderea	-81.7167	12.5	J. M. Pandolfi and J. B. C. Jackson. 2007. Broad-scale patterns in Pleistocene coral reef communities from the Caribbean: implications for ecology and management. In R. B. Aronson (ed.), Geological approaches to coral reef ecology. Ecological Studies 192:201-236
Siderastrea siderea	-81.7	12.5	J. M. Pandolfi and J. B. C. Jackson. 2007. Broad-scale patterns in Pleistocene coral reef communities from the Caribbean: implications for ecology and management. In R. B. Aronson (ed.), Geological approaches to coral reef ecology. Ecological Studies 192:201-236
Siderastrea siderea	-81.7167	12.5667	J. M. Pandolfi and J. B. C. Jackson. 2007. Broad-scale patterns in Pleistocene coral reef communities from the Caribbean: implications for ecology and management. In R. B. Aronson (ed.), Geological approaches to coral reef ecology. Ecological Studies 192:201-236
Siderastrea siderea	-88	17	E. Gischler. 2007. Pleistocene facies of Belize barrier and atoll reefs. Facies 53(1):27-41
Siderastrea siderea	-76.3167	17.8667	S. F. Mitchell, R. K. Pickerill, and T. A. Stemann. 2001. The Port Morant Formation (Upper Pleistocene, Jamaica): high resolution sedimentology and paleoenvironmental analysis of a mixed carbonate clastic lagoonal succession. Sedimentary Geology 144:291-306
Siderastrea siderea	-76.3167	17.8833	S. A. James. 2006. Coral Biodiversity and Zonation on a Pleistocene Reef, Southeastern Jamaica. Jamaica Clearing House Mechanism
Siderastrea siderea	-69.5167	18.4167	J. S. Klaus and A. F. Budd. 2003. Comparison of Caribbean coral reef communities before and after Plio-Pleistocene faunal turnover: Analyses of two Dominican Republic reef sequences. Palaios 18(1):3-21
Siderastrea siderea	-81.3333	19.2833	I. G. Hunter and B. Jones. 1996. Coral associations of the Pleistocene Ironshore Formation, Grand Cayman. Coral Reefs 15(4):249-267
Siderastrea siderea	-81.3833	19.2833	I. G. Hunter and B. Jones. 1996. Coral associations of the Pleistocene Ironshore Formation, Grand Cayman. Coral Reefs 15(4):249-267
Siderastrea siderea	-81.3667	19.3167	I. G. Hunter and B. Jones. 1996. Coral associations of the Pleistocene Ironshore Formation, Grand Cayman. Coral Reefs 15(4):249-267
Siderastrea siderea	-81.3667	19.35	I. G. Hunter and B. Jones. 1996. Coral associations of the Pleistocene Ironshore Formation, Grand Cayman. Coral Reefs 15(4):249-267
Siderastrea siderea	-81.3833	19.3667	I. G. Hunter and B. Jones. 1996. Coral associations of the Pleistocene Ironshore Formation, Grand Cayman. Coral Reefs 15(4):249-267
Siderastrea siderea	-81.3667	19.3667	I. G. Hunter and B. Jones. 1996. Coral associations of the Pleistocene Ironshore Formation, Grand Cayman. Coral Reefs 15(4):249-267
Siderastrea siderea	-81.4	19.3667	I. G. Hunter and B. Jones. 1996. Coral associations of the Pleistocene Ironshore Formation, Grand Cayman. Coral Reefs 15(4):249-267
Siderastrea siderea	-81.3667	19.3833	I. G. Hunter and B. Jones. 1996. Coral associations of the Pleistocene Ironshore Formation, Grand Cayman. Coral Reefs 15(4):249-267
Siderastrea siderea	-81.3833	19.3833	I. G. Hunter and B. Jones. 1996. Coral associations of the Pleistocene Ironshore Formation, Grand Cayman. Coral Reefs 15(4):249-267
Siderastrea siderea	-87.1208	20.5778	E. JordÃ¡n-Dahlgren. 1997. A Caribbean coral reef community of the Pleistocene. Proceedings of the 8th International Coral Reef Symposium 2:1681-1686
Siderastrea siderea	-74.5333	24.05	A. F. Budd and J. M. Pandolfi. 2004. Overlapping species boundaries and hybridization within the Montastrea "annularis" reef coral complex in the Pleistocene of the Bahama Islands. Paleobiology 30(3):396-425
Siderastrea siderea	-74.5167	24.0833	A. F. Budd and J. M. Pandolfi. 2004. Overlapping species boundaries and hybridization within the Montastrea "annularis" reef coral complex in the Pleistocene of the Bahama Islands. Paleobiology 30(3):396-425
Siderastrea siderea	-81.5667	24.6667	N. E. Weisbord. 1974. Late Cenozoic corals of south Florida. Bulletins of American Paleontology 66(285):259-544
Siderastrea siderea	-80.5833	24.9333	B. J. Greenstein, H. A. Curran, and J. M. Pandolfi. 1998. Shifting ecological baselines and the demise of Acropora cervicornis in the western North Atlantic and Caribbean Province: a Pleistocene perspective. Coral Reefs 17:249-261
Siderastrea siderea	-77.9333	24.9833	A. F. Budd and J. M. Pandolfi. 2004. Overlapping species boundaries and hybridization within the Montastrea "annularis" reef coral complex in the Pleistocene of the Bahama Islands. Paleobiology 30(3):396-425
Siderastrea siderea	-80.3833	25.1333	B. J. Greenstein, H. A. Curran, and J. M. Pandolfi. 1998. Shifting ecological baselines and the demise of Acropora cervicornis in the western North Atlantic and Caribbean Province: a Pleistocene perspective. Coral Reefs 17:249-261
Siderastrea siderea	-64.7667	32.2667	D. R. Muhs, K. R. Simmons, and B. Steinke. 2002. Timing and warmth of the Last Interglacial period: new U-series evidence from Hawaii and Bermuda and a new fossil compilation for North America. Quaternary Science Reviews 21:1355-1383
Solenastrea bournoni	-64.6167	11.85	C. Schubert. 1997. Pleistocene marine terraces of la Blanquilla island, Venezuela, and their diagenesis. Proceedings, Third International Coral Reef Symposium 2:149-154
Solenastrea hyades	-81.5667	24.6667	N. E. Weisbord. 1974. Late Cenozoic corals of south Florida. Bulletins of American Paleontology 66(285):259-544
Solenastrea hyades	-81.3667	26.8	N. E. Weisbord. 1974. Late Cenozoic corals of south Florida. Bulletins of American Paleontology 66(285):259-544
Stephanocoenia intersepta	-81.7167	12.5	J. M. Pandolfi and J. B. C. Jackson. 2007. Broad-scale patterns in Pleistocene coral reef communities from the Caribbean: implications for ecology and management. In R. B. Aronson (ed.), Geological approaches to coral reef ecology. Ecological Studies 192:201-236
Stephanocoenia intersepta	-81.7167	12.5667	J. M. Pandolfi and J. B. C. Jackson. 2007. Broad-scale patterns in Pleistocene coral reef communities from the Caribbean: implications for ecology and management. In R. B. Aronson (ed.), Geological approaches to coral reef ecology. Ecological Studies 192:201-236
Stephanocoenia intersepta	-69.5167	18.4167	J. S. Klaus and A. F. Budd. 2003. Comparison of Caribbean coral reef communities before and after Plio-Pleistocene faunal turnover: Analyses of two Dominican Republic reef sequences. Palaios 18(1):3-21
Stephanocoenia intersepta	-81.3667	19.35	W. Kiessling, C. Simpson, and B. Beck, J. Pandolfi. 2011. Taxonomic vetting of Pleistocene coral occurrence data.
Stephanocoenia intersepta	-81.3667	19.3667	W. Kiessling, C. Simpson, and B. Beck, J. Pandolfi. 2011. Taxonomic vetting of Pleistocene coral occurrence data.
Stephanocoenia intersepta	-81.3833	19.3833	W. Kiessling, C. Simpson, and B. Beck, J. Pandolfi. 2011. Taxonomic vetting of Pleistocene coral occurrence data.
Stylophora pistillata	43.6333	-23.4	G. F. Camoin, L. F. Montaggioni, and C. J. R. Braithwaite. 2004. Late glacial to post glacial sea levels in the western Indian Ocean. Marine Geology 206:119-146
Stylophora pistillata	113.833	-22.2167	B. J. Greenstein and J. M. Pandolfi. 2008. Escaping the heat: range shifts of reef coral taxa in coastal Western Australia. Global Change Biology 14:513-528
Stylophora pistillata	168.255	-17.5775	H. Mewis. 2011. Field work Vanuatu.
Stylophora pistillata	168.255	-17.5772	H. Mewis. 2011. Field work Vanuatu.
Stylophora pistillata	145.333	-15.4167	J. M. Webster and P. J. Davies. 2003. Coral variation in two deep drill cores: significance for the Pleistocene development of the Great Barrier Reef. Sedimentary Geology 159(1-2):61-80
Stylophora pistillata	145.75	-15.3333	J. M. Webster and P. J. Davies. 2003. Coral variation in two deep drill cores: significance for the Pleistocene development of the Great Barrier Reef. Sedimentary Geology 159(1-2):61-80
Stylophora pistillata	147.783	-6.31667	J. M. Pandolfi. 1996. Limited membership in Pleistocene reef coral assemblages from the Huon Peninsula, Papua New Guinea: constancy during global change. Paleobiology 22(2):152-176
Stylophora pistillata	147.667	-6.21667	J. M. Pandolfi. 1996. Limited membership in Pleistocene reef coral assemblages from the Huon Peninsula, Papua New Guinea: constancy during global change. Paleobiology 22(2):152-176
Stylophora pistillata	147.6	-6.08333	J. M. Pandolfi. 1996. Limited membership in Pleistocene reef coral assemblages from the Huon Peninsula, Papua New Guinea: constancy during global change. Paleobiology 22(2):152-176
Stylophora pistillata	39.6667	-4.03333	J. A. Crame. 1981. Ecological stratification in the Pleistocene coral reefs of the Kenya coast. Palaeontology 24(3):609-646
Stylophora pistillata	43.15	11.6	E. Montanaro Gallitelli. 1973. Ricerche eseguite negli anni 1941-1942 sopra i Coralli delle scogliere emerse di Massaua e Gibuti [Research done between 1941 and 1942 on emersed coral reefs of Massawa and Djibouti]. Missione Geologica dell'Azienda Generale Italiana Petroli (AGIP) nella Dancalia Meridionale e sugli Altipiani Hararini (1936-1938) 4(2):446-519
Stylophora pistillata	43.4	12.0667	H. Faure, C. T. Hoang, and C. Lalou. 1980. Datations 230Th/234U des calcaires coralliens et mouvements verticaux a Djibouti [230Th/234U dating of coral limestones and vertical uplift at Djibouti]. Bulletin de la Societe Geologique de France 22(6):959-962
Stylophora pistillata	39.4667	15.6167	E. Montanaro Gallitelli. 1973. Ricerche eseguite negli anni 1941-1942 sopra i Coralli delle scogliere emerse di Massaua e Gibuti [Research done between 1941 and 1942 on emersed coral reefs of Massawa and Djibouti]. Missione Geologica dell'Azienda Generale Italiana Petroli (AGIP) nella Dancalia Meridionale e sugli Altipiani Hararini (1936-1938) 4(2):446-519
Stylophora pistillata	38.9333	22.8	A. El-Sorogy, M. Youssef, and M. Al-Sabrouty, N. Al-Otaiby. 2013. Facies pattern and molluscan fauna of the Late Pleistocene raised coral reef of Rabigh area, Red Sea coast, Saudi Arabia.
Stylophora pistillata	34.25	26.15	A. S. El-Sorogy. 2008. Contributions to the Pleistocene coral reefs of the Red Sea coast, Egypt. Arab Gulf Journal of Scientific Research 26:63-85
Stylophora pistillata	33.5833	27.65	A. S. El-Sorogy. 2002. Paleontology and depositional environments of the Pleistocene coral reefs of the Gulf of Suez, Egypt. Neues Jahrbuch fÃ¼r Geologie und PalÃ¤ontologie, Abhandlungen 225(3):337-371
Stylophora pistillata	35.4667	27.6833	W-C. Dullo. 1990. Facies, Fossil Record, and Age of Pleistocene Reefs from the Red Sea (Saudi Arabia). Facies 22:1-46
Stylophora pistillata	33.5	27.9333	A. S. El-Sorogy. 2002. Paleontology and depositional environments of the Pleistocene coral reefs of the Gulf of Suez, Egypt. Neues Jahrbuch fÃ¼r Geologie und PalÃ¤ontologie, Abhandlungen 225(3):337-371
Symphyllia agaricia	147.783	-6.31667	J. M. Pandolfi. 1996. Limited membership in Pleistocene reef coral assemblages from the Huon Peninsula, Papua New Guinea: constancy during global change. Paleobiology 22(2):152-176
Symphyllia agaricia	147.6	-6.08333	J. M. Pandolfi. 1996. Limited membership in Pleistocene reef coral assemblages from the Huon Peninsula, Papua New Guinea: constancy during global change. Paleobiology 22(2):152-176
Symphyllia erythraea	39.4667	15.6167	E. Montanaro Gallitelli. 1973. Ricerche eseguite negli anni 1941-1942 sopra i Coralli delle scogliere emerse di Massaua e Gibuti [Research done between 1941 and 1942 on emersed coral reefs of Massawa and Djibouti]. Missione Geologica dell'Azienda Generale Italiana Petroli (AGIP) nella Dancalia Meridionale e sugli Altipiani Hararini (1936-1938) 4(2):446-519
Symphyllia erythraea	35.4667	27.6833	W. Kiessling, C. Simpson, and B. Beck, J. Pandolfi. 2011. Taxonomic vetting of Pleistocene coral occurrence data.
Symphyllia recta	147.783	-6.31667	J. M. Pandolfi. 1996. Limited membership in Pleistocene reef coral assemblages from the Huon Peninsula, Papua New Guinea: constancy during global change. Paleobiology 22(2):152-176
Symphyllia recta	147.6	-6.08333	J. M. Pandolfi. 1996. Limited membership in Pleistocene reef coral assemblages from the Huon Peninsula, Papua New Guinea: constancy during global change. Paleobiology 22(2):152-176
Trachyphyllia geoffroyi	124.258	24.5042	H. L. Foster. 1965. Geology of Ishigaki-shima Ryukyu-retto. United States Geological Survey Professional Paper 399(A):1-119
Turbinaria frondens	153.367	-29.1	J. Pickett. 1981. A Late Pleistocene coral fauna from Evans Head, N.S.W. Alcheringa 5:71-83
Turbinaria mesenterina	35.4667	27.6833	W-C. Dullo. 1990. Facies, Fossil Record, and Age of Pleistocene Reefs from the Red Sea (Saudi Arabia). Facies 22:1-46
Turbinaria peltata	35.4667	27.6833	W-C. Dullo. 1990. Facies, Fossil Record, and Age of Pleistocene Reefs from the Red Sea (Saudi Arabia). Facies 22:1-46
Turbinaria peltata	34.5208	28.5553	H. Mewis. 2011. Field work Sinai.

## Sheet: Training data
Period	Longitude	Latitude
Modern	5	43.125
Modern	13.75	43.125
Modern	16.25	43.125
Modern	13.75	40.625
Modern	18.75	40.625
Modern	2.5	39.375
Modern	23.75	38.125
Modern	13.75	35.625
Modern	-76.25	34.375
Modern	10	34.375
Modern	-77.5	33.125
Modern	35	33.125
Modern	128.75	33.125
Modern	130	33.125
Modern	131.25	33.125
Modern	132.5	33.125
Modern	133.75	33.125
Modern	-80	31.875
Modern	31.25	31.875
Modern	130	31.875
Modern	131.25	30.625
Modern	-93.75	28.125
Modern	-92.5	28.125
Modern	-85	28.125
Modern	-83.75	28.125
Modern	-82.5	28.125
Modern	50	28.125
Modern	-112.5	26.875
Modern	-83.75	26.875
Modern	-82.5	26.875
Modern	50	26.875
Modern	52.5	26.875
Modern	127.5	26.875
Modern	142.5	26.875
Modern	-173.75	25.625
Modern	-170	25.625
Modern	-111.25	25.625
Modern	-83.75	25.625
Modern	-82.5	25.625
Modern	-81.25	25.625
Modern	-80	25.625
Modern	121.25	25.625
Modern	127.5	25.625
Modern	-166.25	24.375
Modern	-110	24.375
Modern	-83.75	24.375
Modern	-82.5	24.375
Modern	-81.25	24.375
Modern	-80	24.375
Modern	-77.5	24.375
Modern	-76.25	24.375
Modern	123.75	24.375
Modern	125	24.375
Modern	-166.25	23.125
Modern	-165	23.125
Modern	-88.75	23.125
Modern	-76.25	23.125
Modern	36.25	23.125
Modern	58.75	23.125
Modern	117.5	23.125
Modern	120	23.125
Modern	-157.5	21.875
Modern	-91.25	21.875
Modern	-88.75	21.875
Modern	-86.25	21.875
Modern	-81.25	21.875
Modern	-72.5	21.875
Modern	-71.25	21.875
Modern	38.75	21.875
Modern	-157.5	20.625
Modern	-156.25	20.625
Modern	-92.5	20.625
Modern	-87.5	20.625
Modern	-78.75	20.625
Modern	-77.5	20.625
Modern	37.5	20.625
Modern	-87.5	19.375
Modern	-87.5	18.125
Modern	-77.5	18.125
Modern	-76.25	18.125
Modern	-67.5	18.125
Modern	-66.25	18.125
Modern	-65	18.125
Modern	-63.75	18.125
Modern	-62.5	18.125
Modern	-87.5	16.875
Modern	-82.5	16.875
Modern	-78.75	16.875
Modern	-63.75	16.875
Modern	120	16.875
Modern	-82.5	15.625
Modern	-81.25	15.625
Modern	42.5	15.625
Modern	115	15.625
Modern	146.25	15.625
Modern	-82.5	14.375
Modern	-81.25	14.375
Modern	42.5	14.375
Modern	-82.5	13.125
Modern	-61.25	13.125
Modern	53.75	13.125
Modern	121.25	13.125
Modern	145	13.125
Modern	-82.5	11.875
Modern	-73.75	11.875
Modern	-72.5	11.875
Modern	-68.75	11.875
Modern	-66.25	11.875
Modern	53.75	11.875
Modern	98.75	11.875
Modern	120	11.875
Modern	162.5	11.875
Modern	165	11.875
Modern	166.25	11.875
Modern	98.75	10.625
Modern	121.25	10.625
Modern	140	10.625
Modern	-80	9.375
Modern	-78.75	9.375
Modern	97.5	9.375
Modern	126.25	9.375
Modern	170	9.375
Modern	-82.5	8.125
Modern	93.75	8.125
Modern	97.5	8.125
Modern	98.75	8.125
Modern	135	8.125
Modern	93.75	6.875
Modern	126.25	6.875
Modern	135	6.875
Modern	151.25	6.875
Modern	152.5	6.875
Modern	158.75	6.875
Modern	171.25	6.875
Modern	72.5	5.625
Modern	95	5.625
Modern	120	5.625
Modern	121.25	5.625
Modern	170	5.625
Modern	72.5	4.375
Modern	73.75	4.375
Modern	118.75	4.375
Modern	120	4.375
Modern	-78.75	3.125
Modern	72.5	3.125
Modern	73.75	3.125
Modern	103.75	3.125
Modern	125	3.125
Modern	103.75	1.875
Modern	105	1.875
Modern	118.75	1.875
Modern	125	1.875
Modern	127.5	1.875
Modern	172.5	1.875
Modern	73.75	0.625
Modern	103.75	0.625
Modern	105	0.625
Modern	122.5	0.625
Modern	125	0.625
Modern	127.5	0.625
Modern	130	0.625
Modern	-43.75	-0.625
Modern	98.75	-0.625
Modern	120	-0.625
Modern	121.25	-0.625
Modern	122.5	-0.625
Modern	127.5	-0.625
Modern	130	-0.625
Modern	131.25	-0.625
Modern	41.25	-1.875
Modern	131.25	-1.875
Modern	127.5	-3.125
Modern	128.75	-3.125
Modern	131.25	-3.125
Modern	132.5	-3.125
Modern	143.75	-3.125
Modern	151.25	-3.125
Modern	40	-4.375
Modern	55	-4.375
Modern	56.25	-4.375
Modern	118.75	-4.375
Modern	133.75	-4.375
Modern	-35	-5.625
Modern	71.25	-5.625
Modern	110	-5.625
Modern	118.75	-5.625
Modern	120	-5.625
Modern	135	-5.625
Modern	150	-5.625
Modern	151.25	-5.625
Modern	40	-6.875
Modern	120	-6.875
Modern	121.25	-6.875
Modern	135	-6.875
Modern	115	-8.125
Modern	117.5	-8.125
Modern	118.75	-8.125
Modern	120	-8.125
Modern	122.5	-8.125
Modern	123.75	-8.125
Modern	125	-8.125
Modern	142.5	-9.375
Modern	143.75	-9.375
Modern	147.5	-9.375
Modern	41.25	-10.625
Modern	123.75	-10.625
Modern	132.5	-10.625
Modern	142.5	-10.625
Modern	143.75	-10.625
Modern	48.75	-11.875
Modern	122.5	-11.875
Modern	131.25	-11.875
Modern	142.5	-11.875
Modern	143.75	-11.875
Modern	167.5	-11.875
Modern	40	-13.125
Modern	45	-13.125
Modern	47.5	-13.125
Modern	48.75	-13.125
Modern	50	-13.125
Modern	122.5	-13.125
Modern	143.75	-13.125
Modern	160	-13.125
Modern	-172.5	-14.375
Modern	-171.25	-14.375
Modern	-148.75	-14.375
Modern	41.25	-14.375
Modern	121.25	-14.375
Modern	125	-14.375
Modern	145	-14.375
Modern	146.25	-14.375
Modern	-38.75	-15.625
Modern	123.75	-15.625
Modern	125	-15.625
Modern	145	-15.625
Modern	146.25	-15.625
Modern	-38.75	-16.875
Modern	60	-16.875
Modern	145	-16.875
Modern	146.25	-16.875
Modern	151.25	-16.875
Modern	177.5	-16.875
Modern	-178.75	-18.125
Modern	-150	-18.125
Modern	-38.75	-18.125
Modern	-37.5	-18.125
Modern	146.25	-18.125
Modern	147.5	-18.125
Modern	162.5	-18.125
Modern	177.5	-18.125
Modern	178.75	-18.125
Modern	36.25	-19.375
Modern	63.75	-19.375
Modern	116.25	-19.375
Modern	121.25	-19.375
Modern	148.75	-19.375
Modern	150	-19.375
Modern	152.5	-19.375
Modern	158.75	-19.375
Modern	163.75	-19.375
Modern	115	-20.625
Modern	116.25	-20.625
Modern	118.75	-20.625
Modern	148.75	-20.625
Modern	150	-20.625
Modern	151.25	-20.625
Modern	152.5	-20.625
Modern	163.75	-20.625
Modern	165	-20.625
Modern	166.25	-20.625
Modern	167.5	-20.625
Modern	113.75	-21.875
Modern	152.5	-21.875
Modern	166.25	-21.875
Modern	-135	-23.125
Modern	113.75	-23.125
Modern	151.25	-23.125
Modern	152.5	-23.125
Modern	167.5	-23.125
Modern	-46.25	-24.375
Modern	113.75	-24.375
Modern	152.5	-24.375
Modern	112.5	-25.625
Modern	113.75	-25.625
Modern	153.75	-26.875
Modern	113.75	-28.125
Modern	113.75	-29.375
Modern	153.75	-29.375
Modern	153.75	-30.625
Modern	30	-31.875
Modern	152.5	-33.125
Modern	18.75	-34.375
Modern	120	-34.375
Modern	122.5	-34.375
Modern	117.5	-35.625
LIG	17.5	40.625
LIG	8.75	39.375
LIG	-1.25	38.125
LIG	27.5	35.625
LIG	-65	31.875
LIG	130	28.125
LIG	-112.5	26.875
LIG	-111.25	26.875
LIG	-81.25	26.875
LIG	-111.25	25.625
LIG	-80	25.625
LIG	-77.5	25.625
LIG	-111.25	24.375
LIG	-110	24.375
LIG	-81.25	24.375
LIG	-80	24.375
LIG	-77.5	24.375
LIG	-75	24.375
LIG	123.75	24.375
LIG	-110	23.125
LIG	38.75	23.125
LIG	68.75	21.875
LIG	-87.5	20.625
LIG	-81.25	19.375
LIG	-80	19.375
LIG	-87.5	18.125
LIG	-77.5	18.125
LIG	-76.25	18.125
LIG	-70	18.125
LIG	-65	18.125
LIG	-87.5	16.875
LIG	-61.25	15.625
LIG	40	15.625
LIG	-81.25	13.125
LIG	-60	13.125
LIG	-68.75	11.875
LIG	-65	11.875
LIG	40	-3.125
LIG	40	-4.375
LIG	56.25	-4.375
LIG	147.5	-5.625
LIG	46.25	-9.375
LIG	120	-9.375
LIG	166.25	-13.125
LIG	145	-15.625
LIG	146.25	-15.625
LIG	-150	-16.875
LIG	168.75	-18.125
LIG	57.5	-20.625
LIG	115	-20.625
LIG	113.75	-21.875
LIG	166.25	-21.875
LIG	167.5	-23.125
LIG	113.75	-24.375
LIG	113.75	-28.125
LIG	153.75	-29.375
