# Supplementary material for: Coupling of palaeontological and neontological reef coral data improves forecasts of biodiversity responses under global climatic change
Source: R Soc Open Sci. 2019 Apr 24;6(4):182111. doi: 10.1098/rsos.182111 (PMC6502368; doi:10.1098/rsos.182111)
Supplement: Supplementary Material 3 [file rsos182111supp3.xlsx]

## Sheet: SM3
Supplementary Material 3: Sum of cells within 5° latitudinal bins for all model classes, binary thresholds and climate scenarios.
LATITUDINAL BIN MIDPOINT (°)	SUM OF CELLS
	COMBINED												MODERN TRAINED												LIG TRAINED
	LIG			MODERN			RCP4.5			RCP8.5			LIG			MODERN			RCP4.5			RCP8.5			LIG			MODERN			RCP4.5			RCP8.5
	5	10	20	5	10	20	5	10	20	5	10	20	5	10	20	5	10	20	5	10	20	5	10	20	5	10	20	5	10	20	5	10	20	5	10	20
87.5	0	0	0	0	0	0	0	0	0	0	0	0	0	0	0	0	0	0	0	0	0	0	0	0	0	0	0	0	0	0	0	0	0	0	0	0
82.5	0	0	0	0	0	0	0	0	0	0	0	0	0	0	0	0	0	0	0	0	0	0	0	0	0	0	0	0	0	0	0	0	0	0	0	0
77.5	0	0	0	0	0	0	0	0	0	0	0	0	0	0	0	0	0	0	0	0	0	0	0	0	0	0	0	0	0	0	0	0	0	0	0	0
72.5	0	0	0	0	0	0	0	0	0	0	0	0	0	0	0	0	0	0	0	0	0	0	0	0	0	0	0	0	0	0	0	0	0	0	0	0
67.5	0	0	0	0	0	0	0	0	0	0	0	0	0	0	0	0	0	0	0	0	0	0	0	0	0	0	0	0	0	0	0	0	0	0	0	0
62.5	0	0	0	0	0	0	0	0	0	0	0	0	0	0	0	0	0	0	0	0	0	0	0	0	0	0	0	0	0	0	0	0	0	0	0	0
57.5	0	0	0	0	0	0	0	0	0	0	0	0	0	0	0	0	0	0	0	0	0	0	0	0	0	0	0	0	0	0	0	0	0	0	0	0
52.5	0	0	0	0	0	0	0	0	0	0	0	0	0	0	0	0	0	0	0	0	0	0	0	0	0	0	0	0	0	0	0	0	0	0	0	0
47.5	0	0	0	0	0	0	0	0	0	0	0	0	0	0	0	0	0	0	0	0	0	0	0	0	0	0	0	0	0	0	0	0	0	0	0	0
42.5	14	8	3	3	0	0	14	7	0	15	13	4	7	0	0	1	0	0	14	0	0	15	13	0	11	8	3	2	0	0	10	7	0	13	12	4
37.5	44	35	27	30	20	15	55	42	34	84	71	49	18	3	0	22	3	0	48	14	2	69	43	8	42	35	27	25	20	15	44	42	34	69	63	49
32.5	89	77	62	109	96	63	114	103	81	127	115	95	77	61	34	108	90	39	111	93	51	125	106	76	67	64	60	82	78	58	80	76	69	77	74	69
27.5	120	105	92	113	110	93	121	116	83	122	118	96	109	71	34	107	98	54	120	107	61	122	108	77	101	99	92	98	94	88	76	73	69	72	67	59
22.5	174	160	122	153	146	129	153	150	124	150	139	87	161	120	68	152	134	108	152	139	98	149	134	69	138	133	105	135	123	113	120	112	96	96	83	59
17.5	167	150	127	155	150	121	146	139	114	143	119	73	163	140	90	154	138	103	146	135	98	143	116	62	120	116	102	108	102	91	83	75	67	45	42	35
12.5	163	151	130	147	138	102	134	122	72	131	103	44	160	145	107	146	132	93	133	121	63	131	103	44	107	104	95	87	85	74	67	64	55	39	34	25
7.5	191	165	135	160	152	103	150	122	59	144	85	15	191	165	132	160	152	96	150	122	57	144	85	14	99	95	87	66	63	54	26	25	21	9	8	8
2.5	116	88	73	105	93	59	120	80	31	124	74	13	116	86	63	105	93	59	120	80	31	124	74	13	52	51	45	35	31	28	15	15	13	6	6	4
-2.5	153	136	116	130	112	90	139	114	48	143	112	22	153	133	102	130	112	89	139	114	47	143	112	22	70	67	65	56	48	35	35	32	25	10	9	3
-7.5	205	194	169	179	164	129	169	122	41	171	128	12	205	194	165	179	164	124	169	122	40	171	128	10	101	95	87	64	59	45	19	17	13	9	9	6
-12.5	194	189	152	194	183	137	180	155	105	158	119	27	194	189	150	194	183	135	180	155	104	158	119	25	123	120	104	98	88	70	51	46	34	14	14	10
-17.5	172	166	138	147	136	100	147	135	94	139	121	62	172	166	133	147	135	96	147	135	90	139	121	58	132	127	115	85	77	49	60	53	34	44	39	29
-22.5	128	118	86	141	132	90	140	131	87	140	126	75	128	118	74	141	129	89	140	128	82	140	126	74	94	93	81	83	74	48	83	72	44	69	54	33
-27.5	71	66	27	66	56	25	71	60	33	80	69	34	71	65	26	65	53	23	70	58	29	75	64	31	16	11	3	23	20	12	26	23	17	34	29	16
-32.5	34	18	6	14	7	3	19	12	5	24	20	7	34	18	6	12	5	3	16	8	3	23	16	6	0	0	0	8	5	1	12	8	3	15	11	3
-37.5	4	0	0	2	1	0	2	1	0	3	1	0	4	0	0	0	0	0	2	0	0	2	0	0	0	0	0	2	1	0	1	1	0	2	1	0
-42.5	0	0	0	0	0	0	0	0	0	0	0	0	0	0	0	0	0	0	0	0	0	0	0	0	0	0	0	0	0	0	0	0	0	0	0	0
-47.5	0	0	0	0	0	0	0	0	0	0	0	0	0	0	0	0	0	0	0	0	0	0	0	0	0	0	0	0	0	0	0	0	0	0	0	0
-52.5	0	0	0	0	0	0	0	0	0	0	0	0	0	0	0	0	0	0	0	0	0	0	0	0	0	0	0	0	0	0	0	0	0	0	0	0
-57.5	0	0	0	0	0	0	0	0	0	0	0	0	0	0	0	0	0	0	0	0	0	0	0	0	0	0	0	0	0	0	0	0	0	0	0	0
-62.5	0	0	0	0	0	0	0	0	0	0	0	0	0	0	0	0	0	0	0	0	0	0	0	0	0	0	0	0	0	0	0	0	0	0	0	0
-67.5	0	0	0	0	0	0	0	0	0	0	0	0	0	0	0	0	0	0	0	0	0	0	0	0	0	0	0	0	0	0	0	0	0	0	0	0
-72.5	0	0	0	0	0	0	0	0	0	0	0	0	0	0	0	0	0	0	0	0	0	0	0	0	0	0	0	0	0	0	0	0	0	0	0	0
-77.5	0	0	0	0	0	0	0	0	0	0	0	0	0	0	0	0	0	0	0	0	0	0	0	0	0	0	0	0	0	0	0	0	0	0	0	0
-82.5	0	0	0	0	0	0	0	0	0	0	0	0	0	0	0	0	0	0	0	0	0	0	0	0	0	0	0	0	0	0	0	0	0	0	0	0
-87.5	0	0	0	0	0	0	0	0	0	0	0	0	0	0	0	0	0	0	0	0	0	0	0	0	0	0	0	0	0	0	0	0	0	0	0	0
